# Supplementary material for: A DFT-metadynamics study disclosing key properties of ring-opening polymerization catalysts to produce polyethercarbonate polyols from cyclic ethylene carbonate as part of an emerging CCU technology
Source: Royal Society of Chemistry journal article supplement (doi:10.1039/d3cp03146b), 2023-01-01
Supplement: d3cp03146b1.pdf [file d3cp03146b1.pdf]

Supporting Information for

**A DFT-metadynamics study disclosing key properties of ring-opening  
polymerization catalysts to produce polyethercarbonate polyols from cyclic  
ethylene carbonate as part of an emerging CCU technology**

Mojgan Heshmat, Matthias Leven, Olga Linker, Marina Sebastian, Christoph  
Gürtler\*, Martin R. Machat\*

### Metadynamics parameters for proton transfer

UNITS LENGTH= Å TIME=ps ENERGY=kcal/mol  
PACE=25 for the first run; PACE=100 for the second run

d1: DISTANCE ATOMS=atom1,atom2 (H $\cdots$ O distance (in ROH starter molecule))  
d2: DISTANCE ATOMS=atom1,atom2 (RO $\cdots$ C=O distance (alkoxide – C=O))

METAD ARG=d1,d2 SIGMA=0.4,0.4 HEIGHT=0.35 LABEL=restraint

UPPER\_WALLS ARG=d1 AT=3.5 KAPPA=250.0 EXP=2 EPS=1 OFFSET=0  
LABEL=uwall1

UPPER\_WALLS ARG=d2 AT=2.5 KAPPA=250.0 EXP=2 EPS=1 OFFSET=0  
LABEL=uwall2

### Metadynamics parameters for ring opening of cEC

UNITS LENGTH= Å TIME=ps ENERGY=kcal/mol  
PACE=25 for the first run; PACE=100 for the second run

d1: DISTANCE ATOMS=atom1,atom2 (RO $\cdots$ C=O (alkoxide – C=O and cEC ring))  
d2: DISTANCE ATOMS=atom1,atom2 (O $\cdots$ C=O distance (first cEC ring))

METAD ARG=d1,d2 SIGMA=0.4,0.4 HEIGHT=0.35 LABEL=restraint

UPPER\_WALLS ARG=d1 AT=3.7 KAPPA=250.0 EXP=2 EPS=1 OFFSET=0  
LABEL=uwall1

UPPER\_WALLS ARG=d2 AT=2.5 KAPPA=250.0 EXP=2 EPS=1 OFFSET=0  
LABEL=uwall2

### Metadynamics parameters for CO<sub>2</sub> release

UNITS LENGTH= Å TIME=ps ENERGY=kcal/mol  
PACE=25 for the first run; PACE=100 for the second run

d1: DISTANCE ATOMS=atom1,atom2 (O $\cdots$ CH<sub>2</sub>-O (negative oxygen of the CAT and CH<sub>2</sub> of cEC))  
d2: DISTANCE ATOMS=atom1,atom2 (O(ethereal) $\cdots$ CH<sub>2</sub> in cEC)

METAD ARG=d1,d2 SIGMA=0.4,0.4 HEIGHT=0.35 LABEL=restraint

UPPER\_WALLS ARG=d1 AT=3.1 KAPPA=250.0 EXP=2 EPS=1 OFFSET=0  
LABEL=uwall1

UPPER\_WALLS ARG=d2 AT=2.5 KAPPA=250.0 EXP=2 EPS=1 OFFSET=0  
LABEL=uwall2

The constraints of the MTD (harmonic walls) are defined such that the walls are at least 1.2 – 2.5 Å longer than the normal bond length in each case.

The accuracy of the calculated free energies is 10E-9, which is the precision applied by “sumhills” command running in Plumed.

### Variation of the collective variables (CVs) for each step of the reaction

In proton-abstraction step, CV1 is the O...H distance of the ROH (that is elongated in the intermediate structure) and CV2 is the RO...C(C=O) distance with a cEC molecule in the proximity of the alkoxide ion generated from the starter ROH molecule (**Scheme 4**). Variations of the CVs alongside the time evolution of the metadynamics simulations for this step are depicted in **Figure S1**. The regions highlighted with gray in each plot indicate the RO-H bond formation (production of the reactant complex with the ROH molecule). As can be seen in **Figure S1**, multiple transitions between the reactant and intermediate states (bond cleavage and/or formation) can be detected from the CVs behavior.

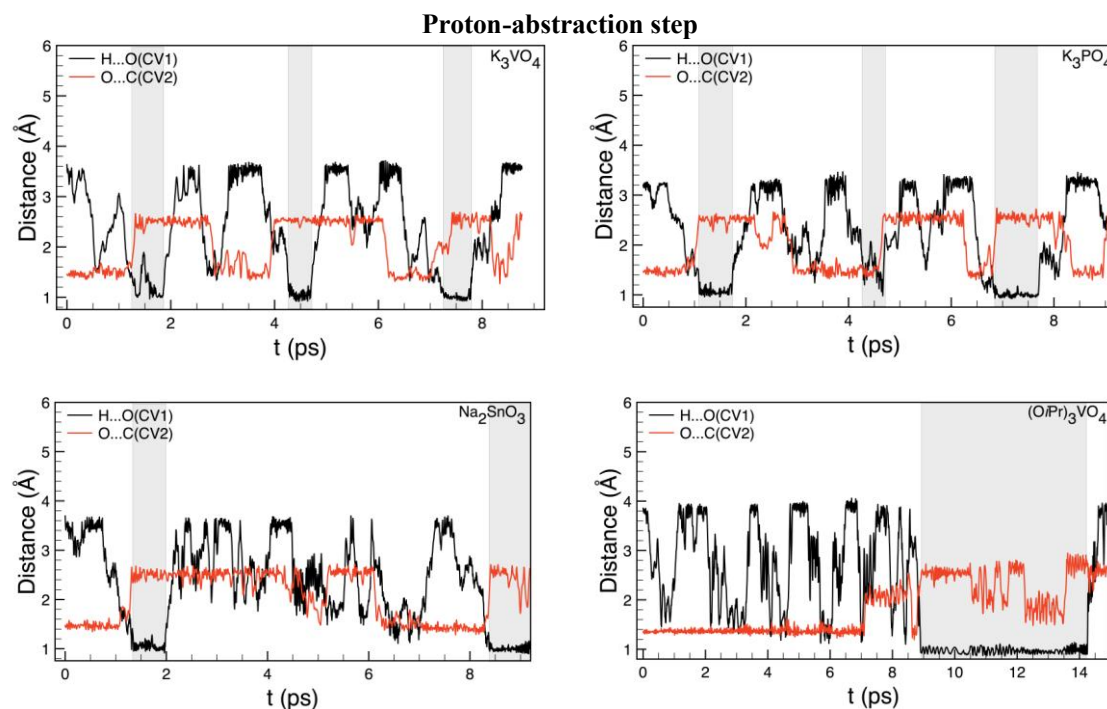

**Figure S1.** Variation of the two CVs alongside the time evolution for the proton abstraction step; the gray highlighted regions show reactant-complex formation (O...H is ca. 1.0 Å).

Variations of the CVs alongside the time evolution for ring opening step are depicted in **Figure S2** and the highlighted regions in each plot indicate the RO-C(C=O) bond formation (producing the product-complex with the longer chain, **Scheme 5**). For the ring-opening step, CV1 is the RO<sup>-</sup>...C(C=O) distance, in which the RO<sup>-</sup> is the alkoxide generated from the first cEC and the C=O is from the second cEC ring. CV2 is the distance between the ethereal O and C inside the second cEC (**Scheme 5**). The starting structure has been singled out with the red box (INT) in **Scheme 5**. Multiple transitions between the intermediate and product molecular complexes indicate the convergence of the FES, which are built upon these CVs.

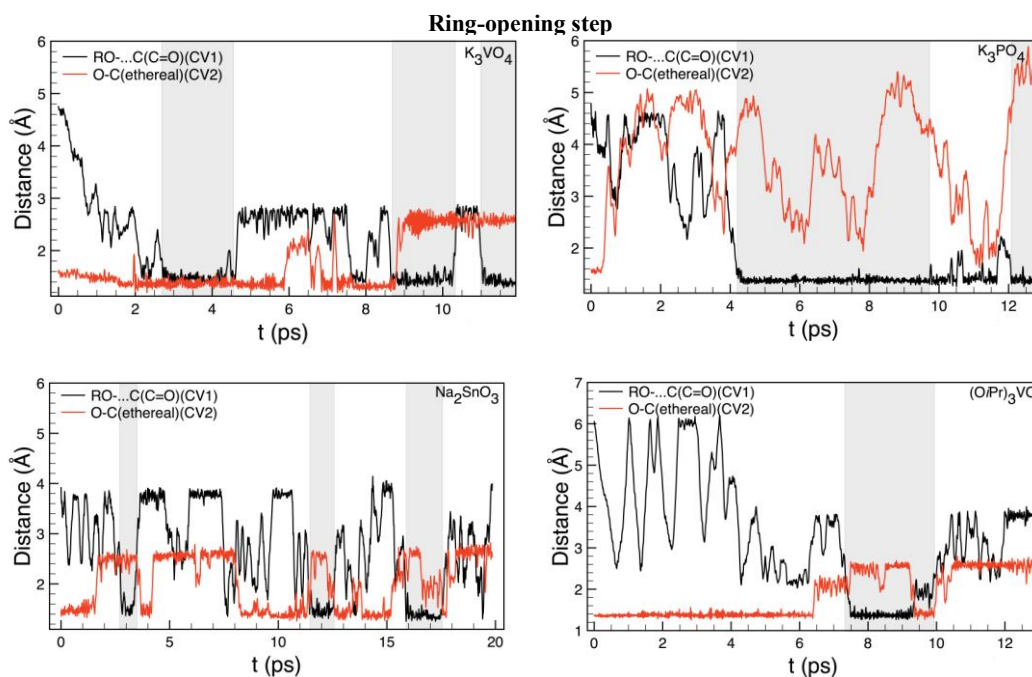

**Figure S2.** Variation of the two CVs alongside the time evolution for the ring-opening step; the gray highlighted regions show product-complex formation (RO<sup>-</sup>...C=O(snd cEC) is ca. 1.4 Å).

### The calculated FES for each step of the reaction

The FESs in **Figures S3 (A-D)** show position of the intermediates and transition states with related energies (kcal/mol) for the molecular systems including  $\text{K}_3\text{VO}_4$ ,  $\text{K}_3\text{PO}_4$ ,  $\text{Na}_2\text{SnO}_3$ , and  $\text{VO}(\text{O}i\text{Pr})_3$  in the proton-abstraction step. In case of the  $\text{K}_3\text{VO}_4$  and  $\text{K}_3\text{PO}_4$  within the molecular cluster the patterns of the FES are rather similar, in which starting from the intermediate state (**I-A** and **I-B**), first the CV2 increases and then CV1 decreases (RO-H bond formation).

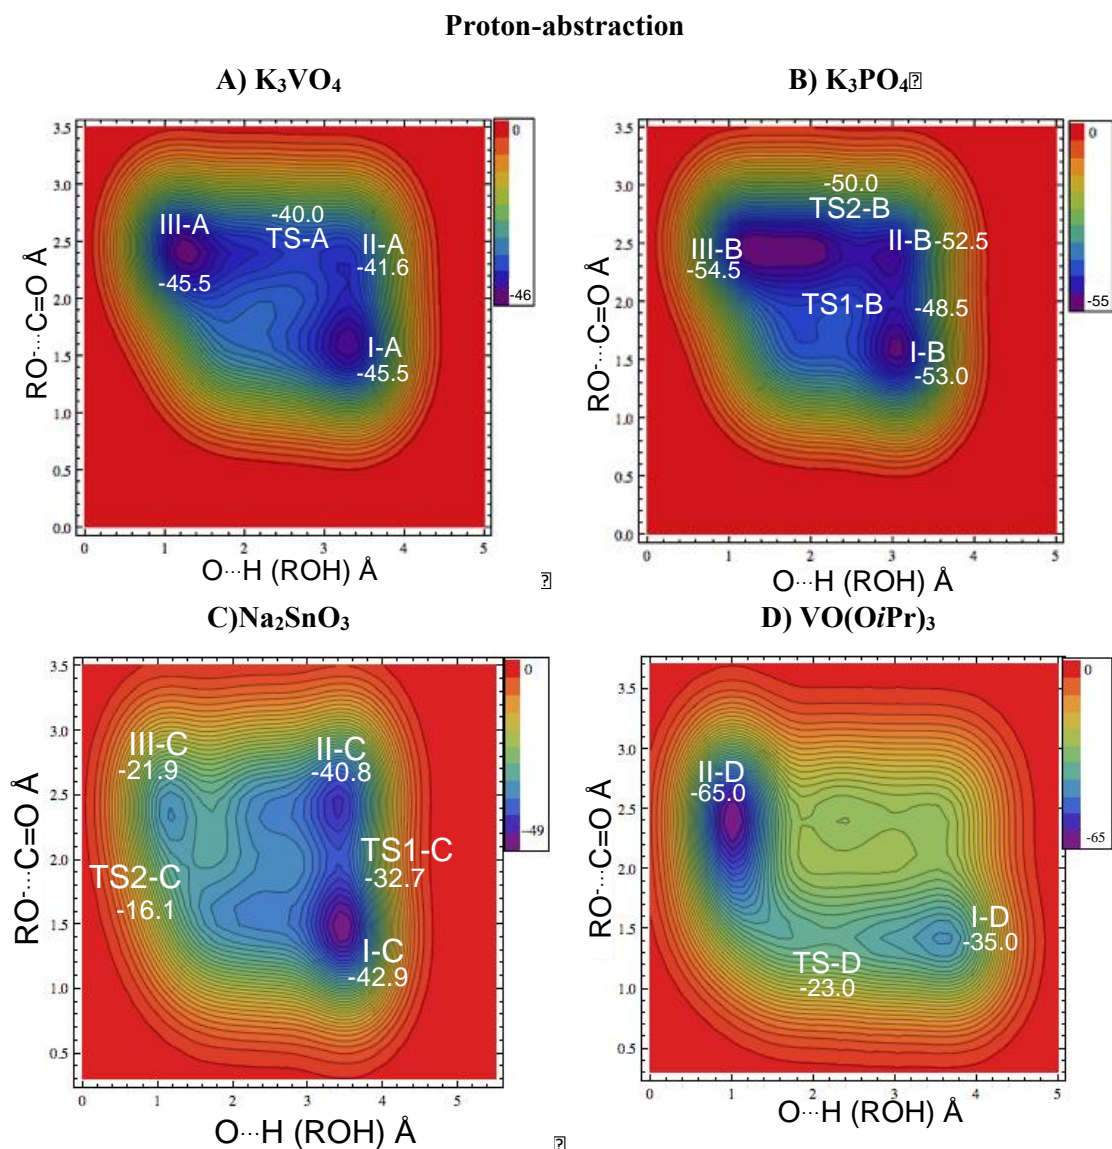

**Figure S3.** Calculated FESs for the proton-abstraction step in molecular systems with  $\text{K}_3\text{VO}_4$ ,  $\text{K}_3\text{PO}_4$ ,  $\text{Na}_2\text{SO}_3$  and  $(\text{O}i\text{Pr})_3\text{VO}$  catalyts.

The higher barrier of conversion of the intermediate **II-C** to the ROH (**III-C**) in case of  $\text{Na}_2\text{SO}_3$  in **Figure S3** indicates higher stabilization of the  $\text{RO}^-$  attached to the  $\text{SnO}_3^{2-}$  anion.

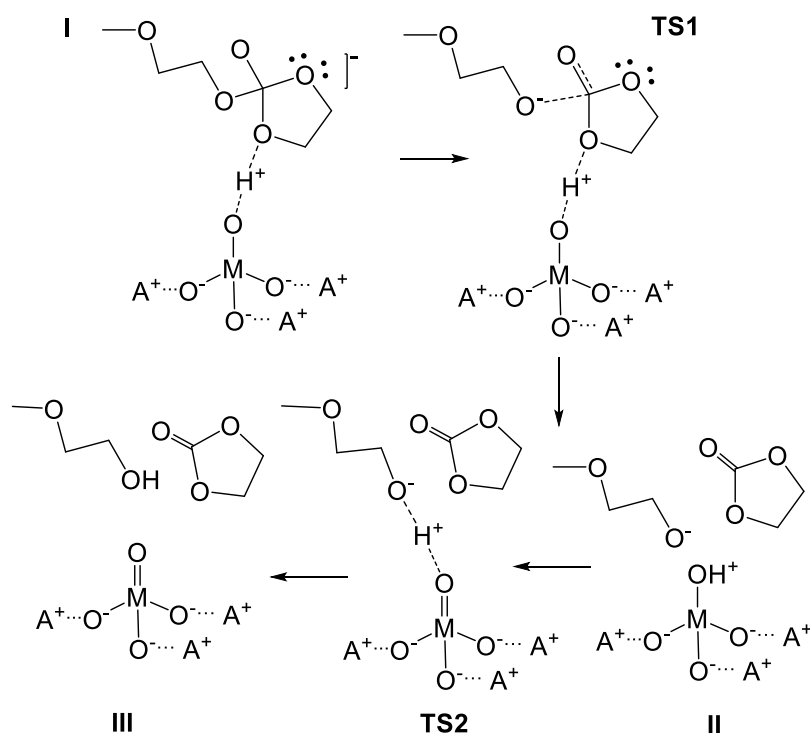

**Scheme S1.** Various states in the FES depicted in **S3** (for simplicity only the reactive molecules are shown and the rest of the cluster is omitted).

FESs for ring-opening step have been depicted in **Figure S4(A-D)**. The FES for  $K_3VO_4$  (**Figure S4-A**) identifies two pathways with rather similar energies. The first pathway starts from **I-A** and passes throughout the **TS1-A**, intermediate **II-A** and **TS2-A** to the product state **III-A**. The **TS1-A** corresponds to the rate-determining-step with a barrier of 7.7 kcal/mol, which correlates to the C-O(etheral) bond cleavage. The second pathway, which is depicted with dotted line, identifies an additional stable state (**II'-A**). Transition from the intermediate **I-A** to the product **III-A** is an exergonic process with a  $\Delta G$  of 7.7 kcal/mol. The FES of the ring-opening for the  $K_3PO_4$ , which is shown in **Figure S4-B**, indicates barriers of 3.5 and 6.9 kcal/mol for the ring-opening and RO-C bond formation.

## Ring-opening of the cEC

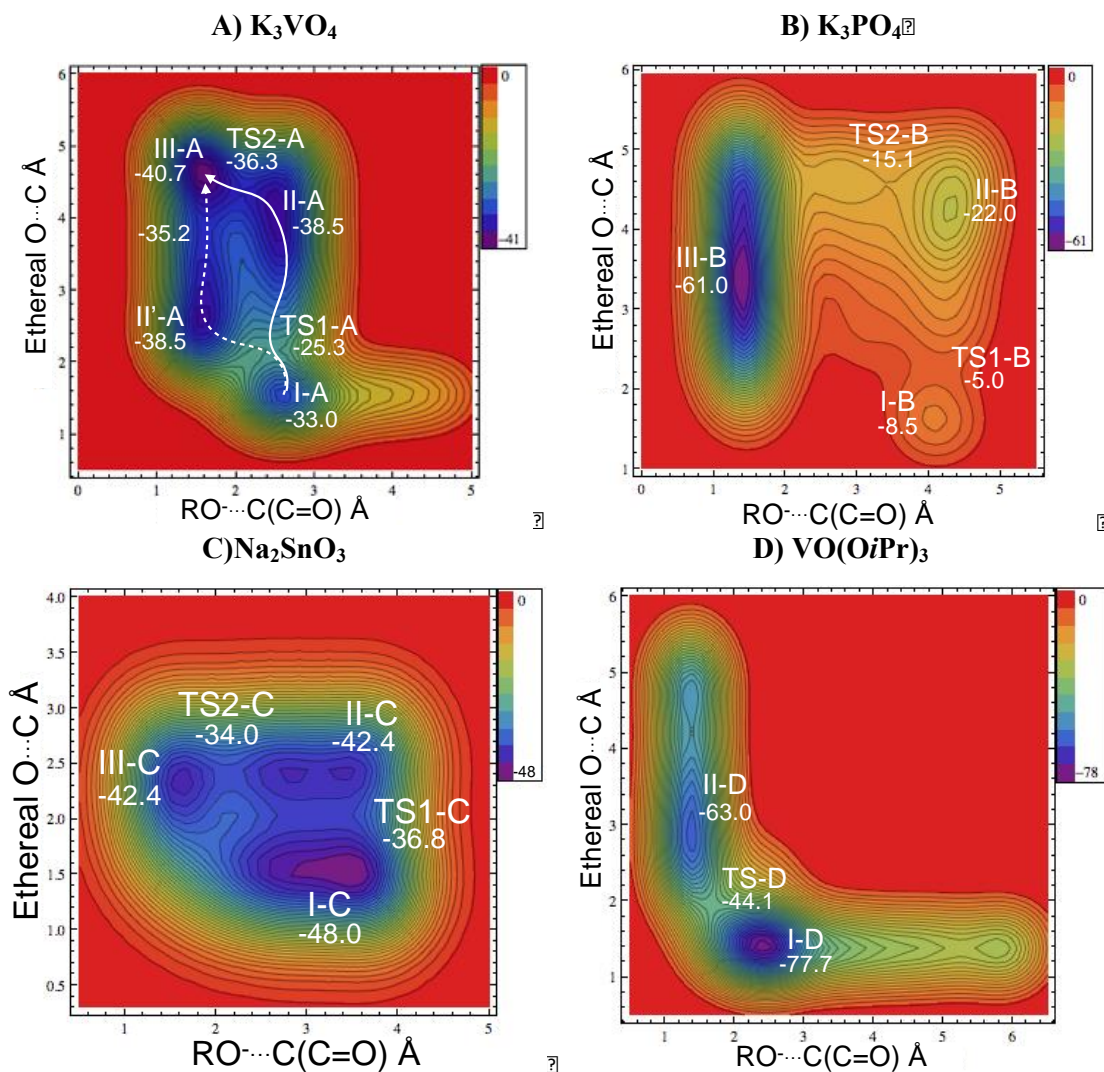

**Figure S4.** Calculated FESs for the ring-opening step in molecular systems with  $K_3VO_4$ ,  $K_3PO_4$ ,  $Na_2SO_3$  and  $(OiPr)_3VO$  catalysts.

In **Figure S4-C** starting from the intermediate state **I-C** and passing through the TS area (**TS1-C**, 11.2 kcal/mol), there is a rather wide flat surface (intermediate **II-C**) with  $RO\cdots C(C=O)$  and ethereal  $O\cdots C$  distance at ca. 3.5 and 2.5 Å. This flat area corresponds to the complexation of the  $RO^-$  to the Sn center (**Figure 2**) that a stable molecular complex is formed with 5.6 kcal/mol higher  $\Delta G$  than the initial state **I-C**. This state then passes through a barrier (**TS2-C**, 8.4 kcal/mol) and the  $RO\cdots C(C=O)$  bond is formed.

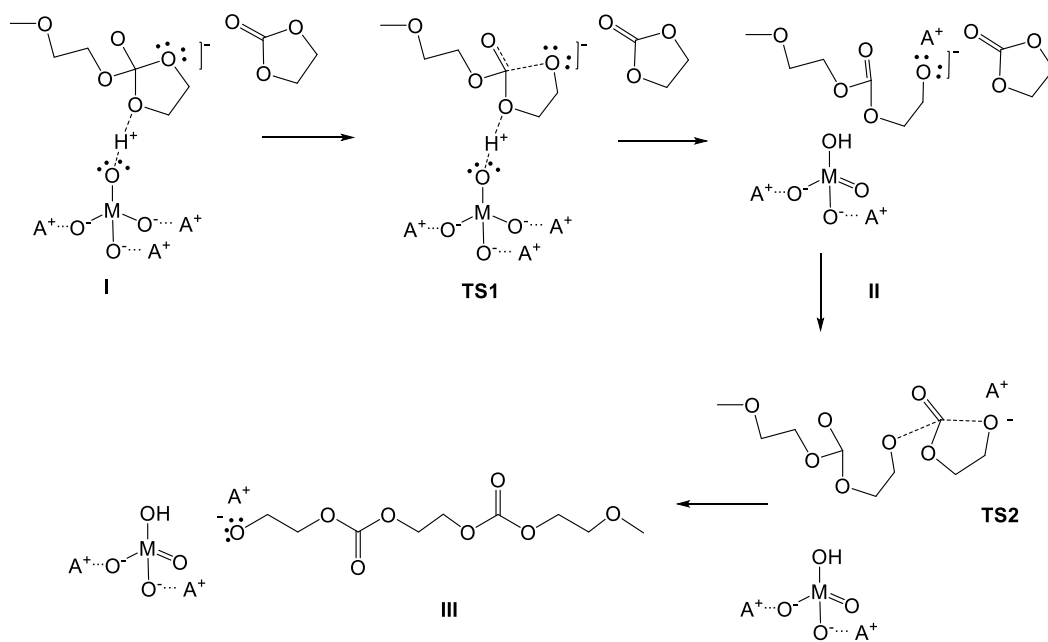

**Scheme S2.** Various states in the FES depicted in **S4** (for simplicity only the reactive molecules are shown and the rest of the cluster is omitted).

#### Variation of the distances alongside the MTD simulations

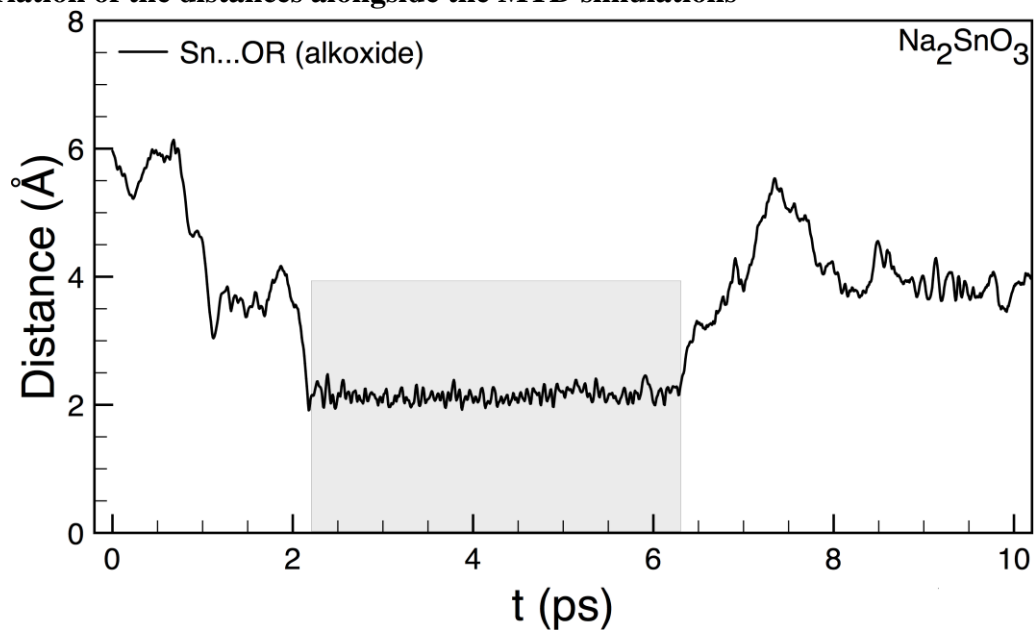

**Figure S5.** A similar behavior (to the ring opening step) of complexation of the  $\text{RO}^-$  to the Sn center can be detected in proton abstraction step.



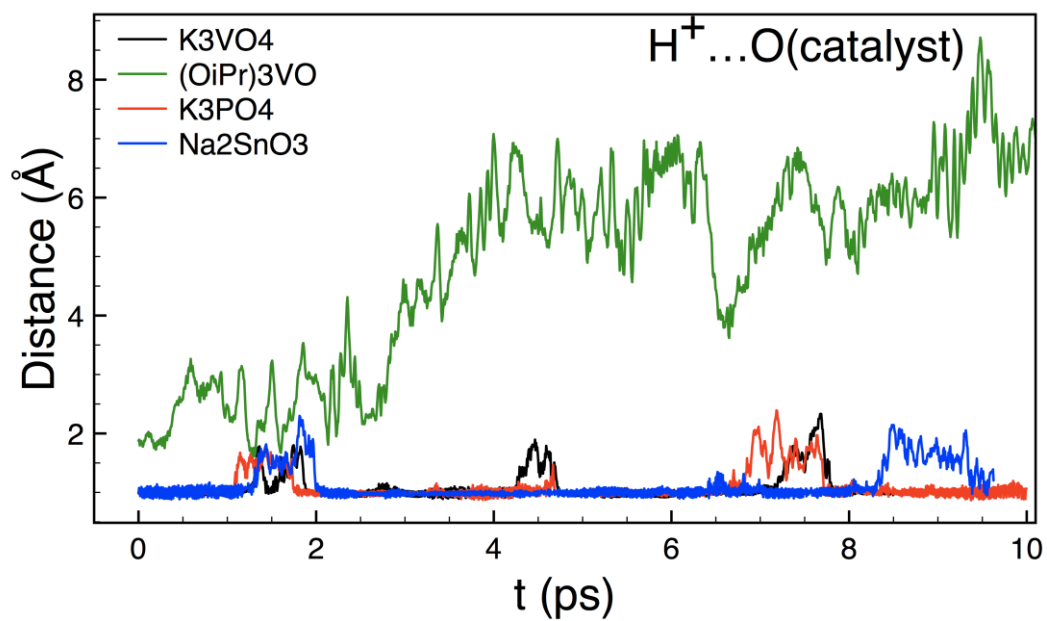

**Figure S6.** H<sup>+</sup>...O(catalyst) distances (Å) vs. simulation time (ps) in the proton abstraction step. The critical H<sup>+</sup>...O(catalyst) distances indicate the role of Brønsted basicity and availability of the anionic oxygen of the catalyst.

### Unbiased equilibrium DFT-MD simulations

Unbiased equilibrium DFT-MD simulations were performed in order to detect the proton exchange between the oxygen of the catalyst-anions and RO<sup>-</sup> from ROH. By probing the distances between the proton and the two oxygen atoms it is observed that in case of stronger Brønsted basic catalysts, such as K<sub>3</sub>VO<sub>4</sub> and Na<sub>2</sub>SnO<sub>3</sub>, proton exchange occurs between the catalyst-oxygen and alcohol oxygen, which is not the case for K<sub>3</sub>PO<sub>4</sub>. The corresponding behavior is shown in **Figure S7**. As can be seen in Figure S7 the average distance between catalyst and proton never approaches to a complete proton transfer (ca. at 1.0Å).

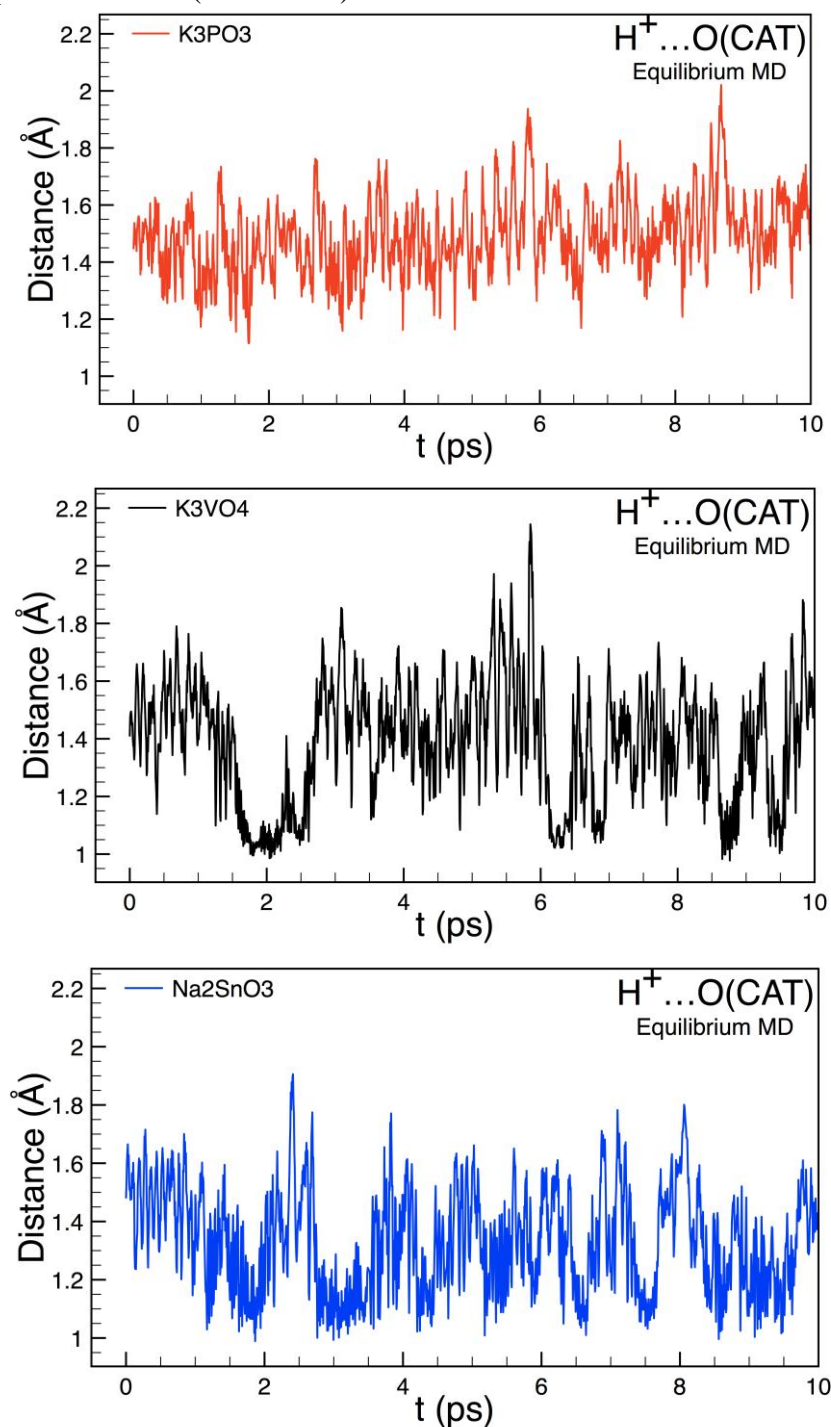

**Figure S7.** Unbiased equilibrium DFT-MD simulations were performed in order to detect the proton exchange between the oxygen of the catalyst-anions and RO<sup>-</sup> from ROH in order to prob the Brønsted basicity of the catalyst anion.

**Variation of the CVs for the CO<sub>2</sub> release mechanism through the nucleophilic attack by the catalyst anion**

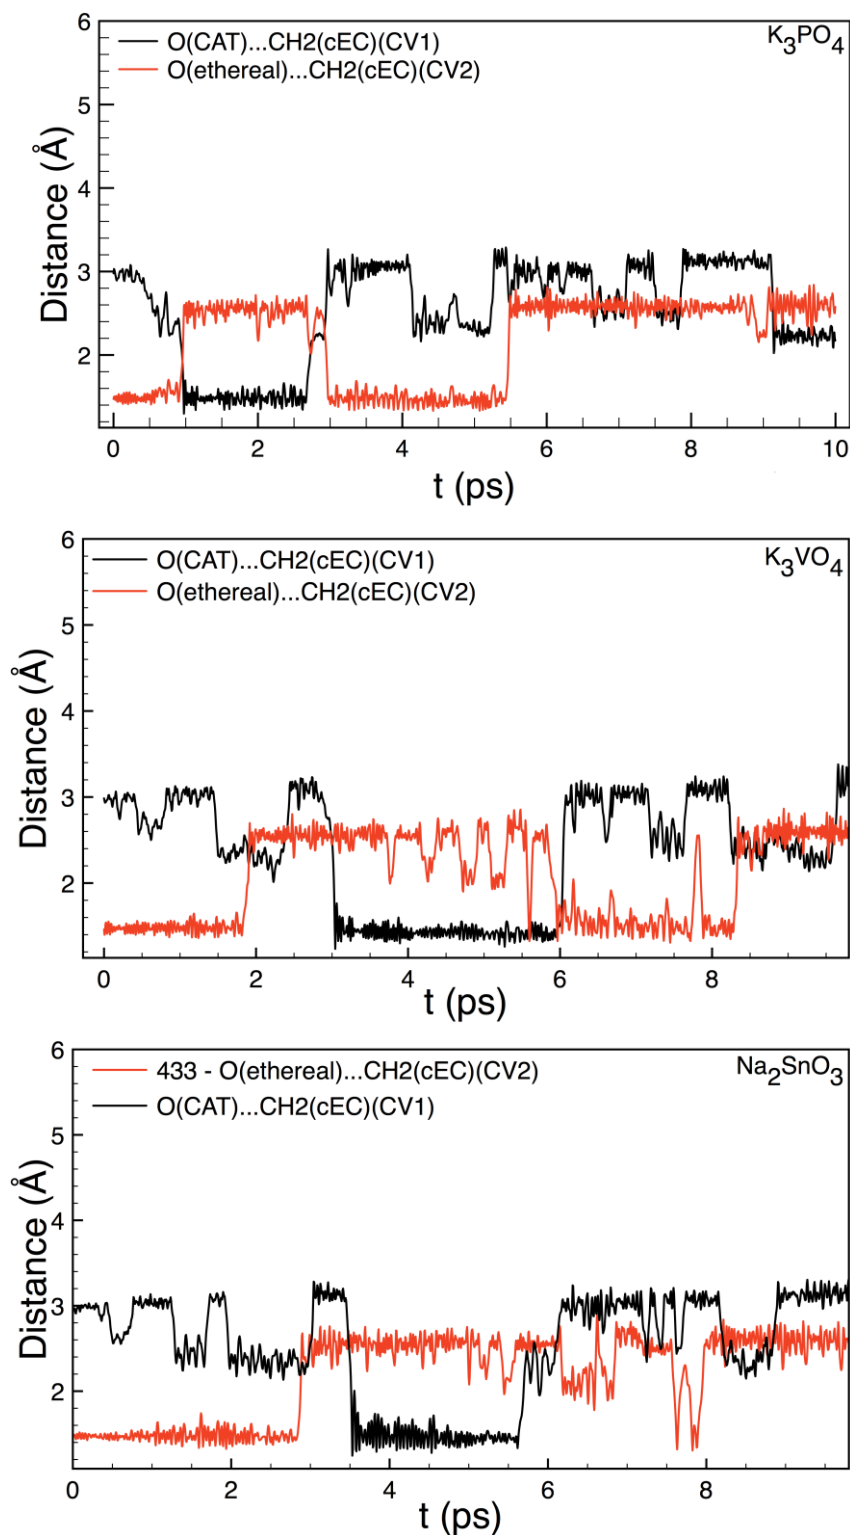

**Figure S8.** Variation of the two CVs alongside the time evolution for the CO<sub>2</sub>-release Mech. I.

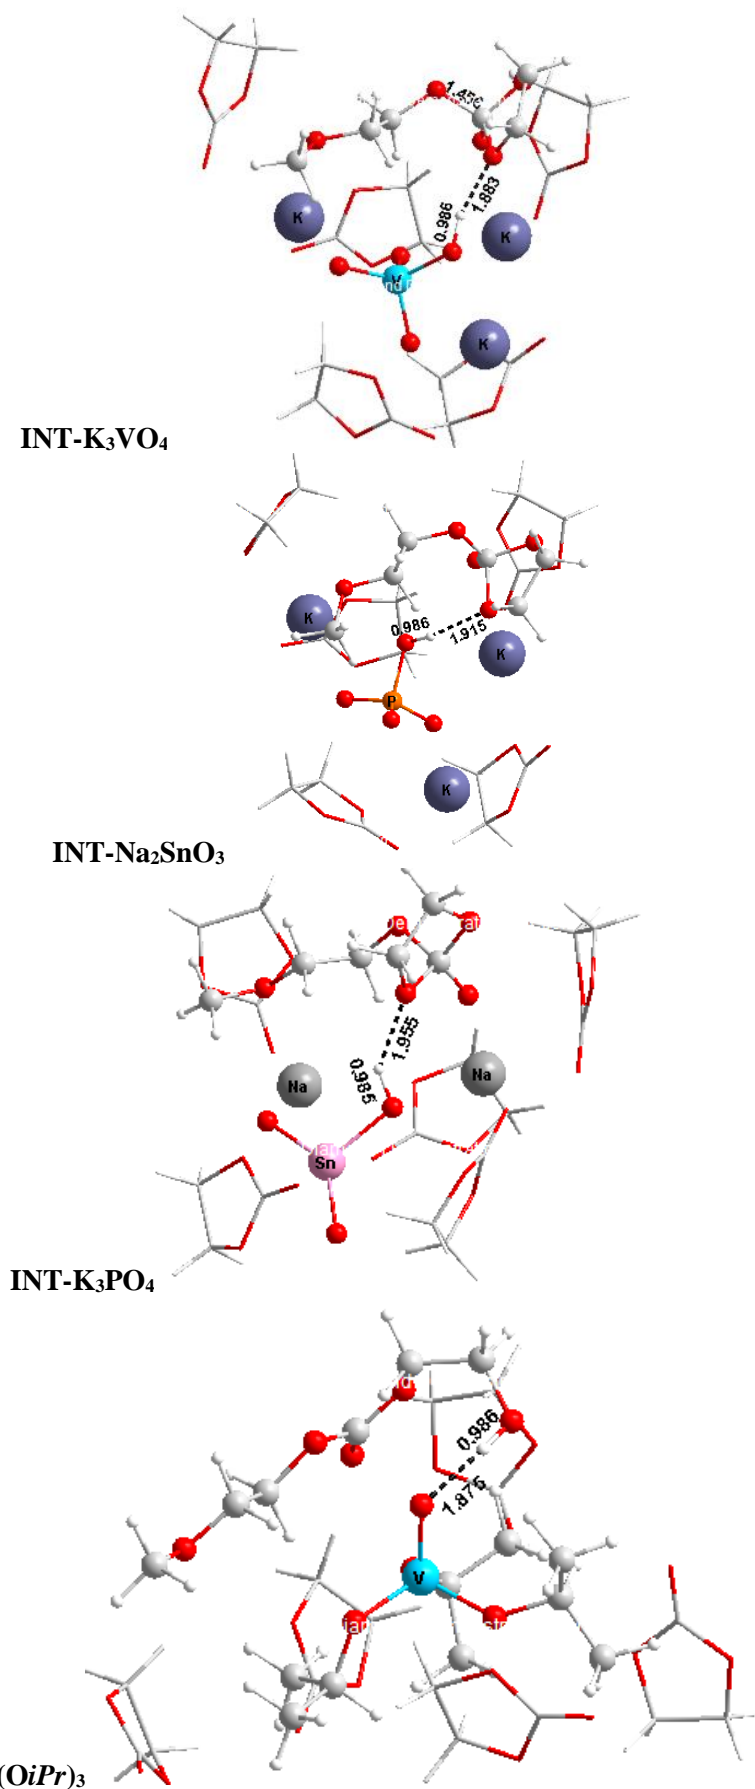

**Figure S9.** The intermediate structures of all molecular systems with four catalysts. The transferred proton from the ROH has been singled out with light blue. As can be

seen the proton is on the catalyst oxygen except in case of the VO(O*iPr*)<sub>3</sub>. The distances are in Å.

**Table S1.** The values of Mulliken atomic charges of the optimized structures of the catalysts (K<sub>3</sub>VO<sub>4</sub>, Na<sub>2</sub>SnO<sub>3</sub>, K<sub>3</sub>PO<sub>4</sub> and VO(O*iPr*)<sub>3</sub>). As can be seen VO(O*iPr*)<sub>3</sub> has the smallest negative charges on the oxygen atoms, which means the lowest basicity.

| Mulliken charges <sup>a</sup> | K <sub>3</sub> VO <sub>4</sub> | Na <sub>2</sub> SnO <sub>3</sub> | K <sub>3</sub> PO <sub>4</sub> | VO(O <i>iPr</i> ) <sub>3</sub> |
|-------------------------------|--------------------------------|----------------------------------|--------------------------------|--------------------------------|
| O <sup>1</sup>                | -0.796471                      | -0.868219                        | -0.809788                      | <b>-0.445676(V=O)</b>          |
| O <sup>2</sup>                | -0.884282                      | -0.925263                        | -0.809733                      | -0.550291                      |
| O <sup>3</sup>                | -0.796470                      | -0.868856                        | -0.718107                      | -0.527690                      |
| O <sup>4</sup>                | -0.883341                      |                                  | -0.718198                      | -0.555806                      |
| <b>Average</b>                | <b>-0.840141</b>               | <b>-0.887446</b>                 | <b>-0.763956</b>               | <b>-0.519866</b>               |

<sup>a</sup> Optimized catalyst structures at BLYP-D3 6-311g\* level of theory

**Table S2.** The activation free energies ( $\Delta G^\ddagger$ ) with various cations for the PO<sub>4</sub><sup>3-</sup>, VO<sub>4</sub><sup>3-</sup>, SnO<sub>3</sub><sup>2-</sup> anions.

| Catalyst                         | $\Delta G^\ddagger$ H <sup>+</sup> abstraction [kcal/mol] | $\Delta G^\ddagger$ cEC opening [kcal/mol] | Exp. conversion [%] | Exp. CO <sub>2</sub> content [%] |
|----------------------------------|-----------------------------------------------------------|--------------------------------------------|---------------------|----------------------------------|
| H <sub>3</sub> PO <sub>4</sub>   | 22.3                                                      | 50.0                                       | 4.0                 | 3.0                              |
| Li <sub>3</sub> PO <sub>4</sub>  | 12.8                                                      | 39.1                                       | 26.0                | 5.0                              |
| Na <sub>3</sub> PO <sub>4</sub>  | 7.6                                                       | 5.2                                        | 82.0                | 11.0                             |
| K <sub>3</sub> PO <sub>4</sub>   | 4.2                                                       | 4.0                                        | 100.0               | 15.0                             |
| Na <sub>2</sub> SnO <sub>3</sub> | 6.2                                                       | 11.2                                       | 99.8                | 26.0                             |
| K <sub>2</sub> SnO <sub>3</sub>  | 6.5                                                       | 10.8                                       | 100.0               | 22.0                             |
| Na <sub>3</sub> VO <sub>4</sub>  | 4.8                                                       | 4.5                                        | 99.8                | 26.0                             |
| K <sub>3</sub> VO <sub>4</sub>   | 5.8                                                       | 7.7                                        | 100.0               | 25.0                             |

**Table S3.** Average bond distances (Å) for the optimized catalyst structures at BLYP-D3 6-311g\* level of theory (obtained by Gaussian) .

| Average Bond distances <sup>a</sup>                | K <sub>3</sub> VO <sub>4</sub> | Na <sub>2</sub> SnO <sub>3</sub> | K <sub>3</sub> PO <sub>4</sub> | VO(O <i>iPr</i> ) <sub>3</sub> |
|----------------------------------------------------|--------------------------------|----------------------------------|--------------------------------|--------------------------------|
| M-O                                                | 1.7445                         | 1.9816                           | 1.5995                         | 1.7447                         |
| O <sup>+</sup> cation/O( <i>iPr</i> ) <sub>3</sub> | 2.4807                         | 2.2392                           | 2.4791                         | 1.4523                         |

**Table S4.** Average bond distances (Å) for the optimized catalyst structures at PBE-D3 DZVP-MOLOPT-GTH level of theory (obtained by CP2K).

| Average Bond distances <sup>a</sup>                | K <sub>3</sub> VO <sub>4</sub> | Na <sub>2</sub> SnO <sub>3</sub> | K <sub>3</sub> PO <sub>4</sub> | VO(O <i>iPr</i> ) <sub>3</sub> |
|----------------------------------------------------|--------------------------------|----------------------------------|--------------------------------|--------------------------------|
| M-O                                                | 1.7340                         | 1.9390                           | 1.5708                         | 1.7361                         |
| O <sup>+</sup> cation/O( <i>iPr</i> ) <sub>3</sub> | 2.6166                         | 2.2705                           | 2.6035                         | 1.4583                         |

**Table S5.** The effect of M-O bond length on the performance of the catalyst anion to maintain CO<sub>2</sub> in the polymer.

| anion                             | M-O dist. [Å] | X <sub>exp.</sub> [%] | CO <sub>2;exp.</sub> [wt.-%] |
|-----------------------------------|---------------|-----------------------|------------------------------|
| (CO <sub>3</sub> ) <sup>2-</sup>  | 1.27          | 100                   | 15                           |
| (SO <sub>4</sub> ) <sup>2-</sup>  | 1.50          | 90                    | 15                           |
| (PO <sub>4</sub> ) <sup>3-</sup>  | 1.55          | 100                   | 15                           |
| (WO <sub>4</sub> ) <sup>2-</sup>  | 1.75          | 99.8                  | 25                           |
| (VO <sub>4</sub> ) <sup>3-</sup>  | 1.76          | 100                   | 25                           |
| (SnO <sub>3</sub> ) <sup>2-</sup> | 1.90          | 99.8                  | 26                           |

The nucleophilicity or basicity of the catalyst anions are correlated to the structural parameters (M-O bond distances) that affect the catalyst performance. Hence, M-O bond distance correlates to the nucleophilicity/basicity that determines the catalyst performance, they are correlated. The original data set that we have considered for the current study consists of 30 different catalysts and the trends and conclusions are obtained for the data set is systematically examined for all the 30 molecular systems (some of them are listed in the Table S5). Due to the confidentiality reasons, we only show a few of the observed results that confirms the M-O bond distance-reactivity relationship. As can be seen in the Table S5, the anions such as CO<sub>3</sub><sup>2-</sup>, SO<sub>4</sub><sup>2-</sup> and PO<sub>4</sub><sup>3-</sup> with the M-O bond lengths smaller than 1.55 Å are prone to less CO<sub>2</sub> content than the anions with longer M-O bond length. Also, please see the variation of the catalyst-H<sup>+</sup> distances shown in Figure 3 and 4, that the weaker basicity is observed in movement of proton from anion to the cEC. As another proof of weaker basicity of phosphate anion, Figure S7 shows an equilibrium MD simulation without any bias. The average distance between O(CAT)...H<sup>+</sup> is 1.4 Å for K<sub>3</sub>PO<sub>4</sub>, however, in case of Na<sub>2</sub>SnO<sub>3</sub> and K<sub>3</sub>VO<sub>4</sub> the proton leaves ROH and bounds to the catalyst at certain time intervals. In conclusion and according to our analysis softer anions perform better than harder anions in aspect of CO<sub>2</sub> content.

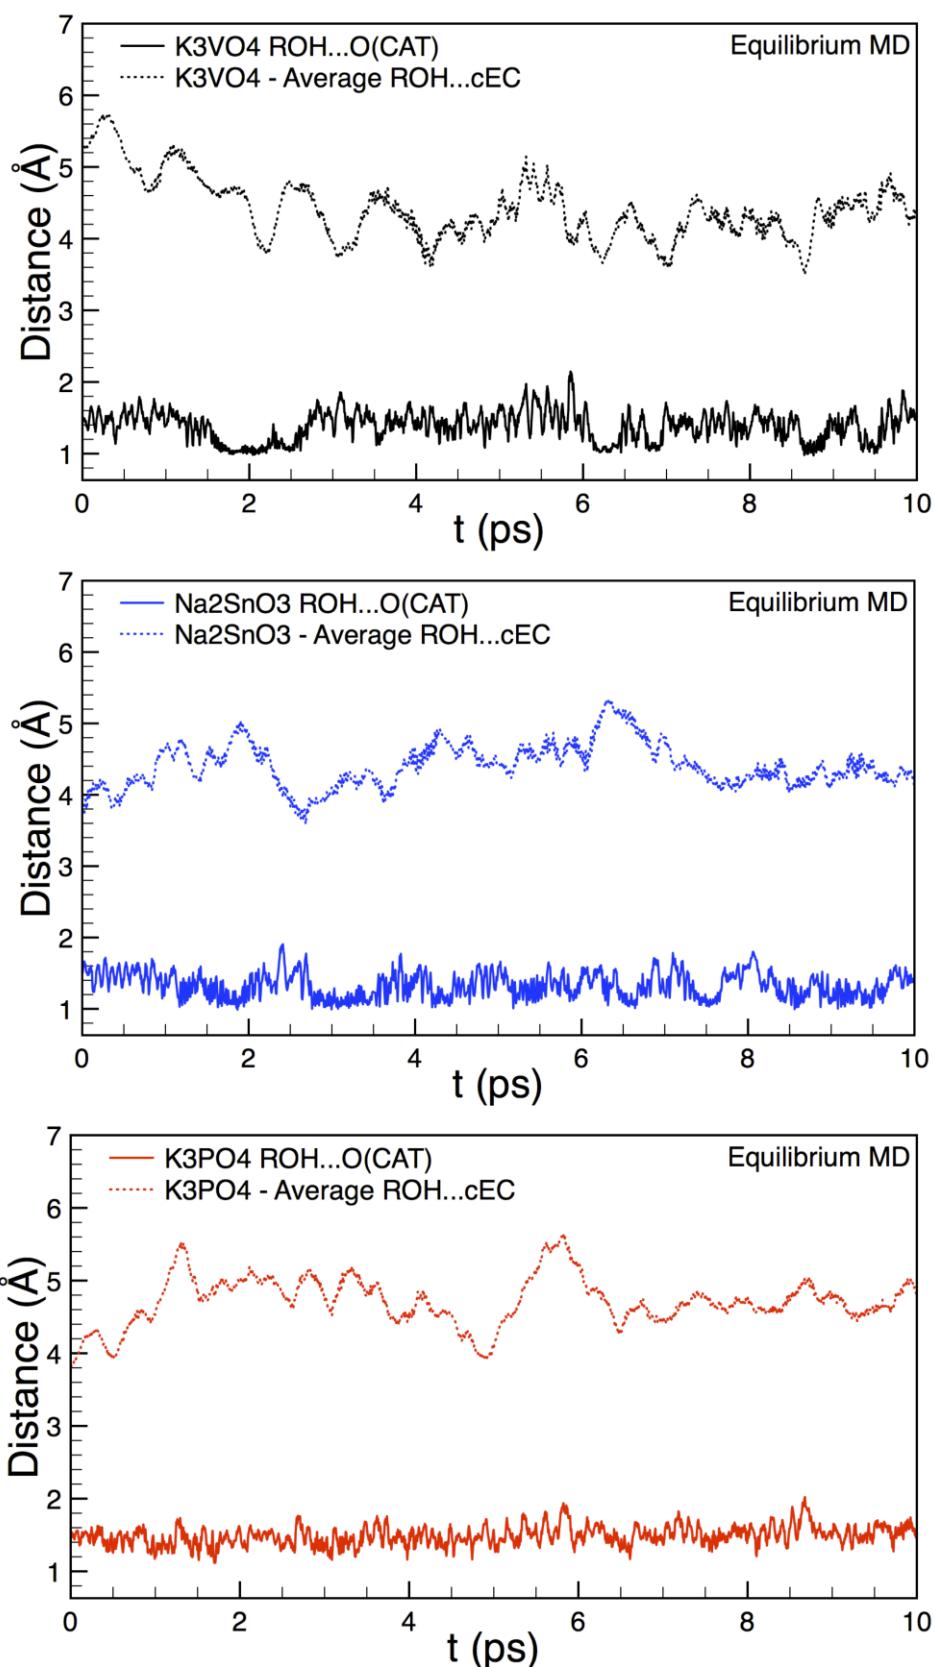

**Figure S10.** The variation of average H-bond distances between ROH and surrounding cEC monomers ( $\text{H}\cdots\text{O}(\text{cEC})$ ) in the first solvation shell in comparison to the  $\text{ROH}\cdots\text{O}(\text{CAT-anion})$  alongside an unbiased MD simulations.

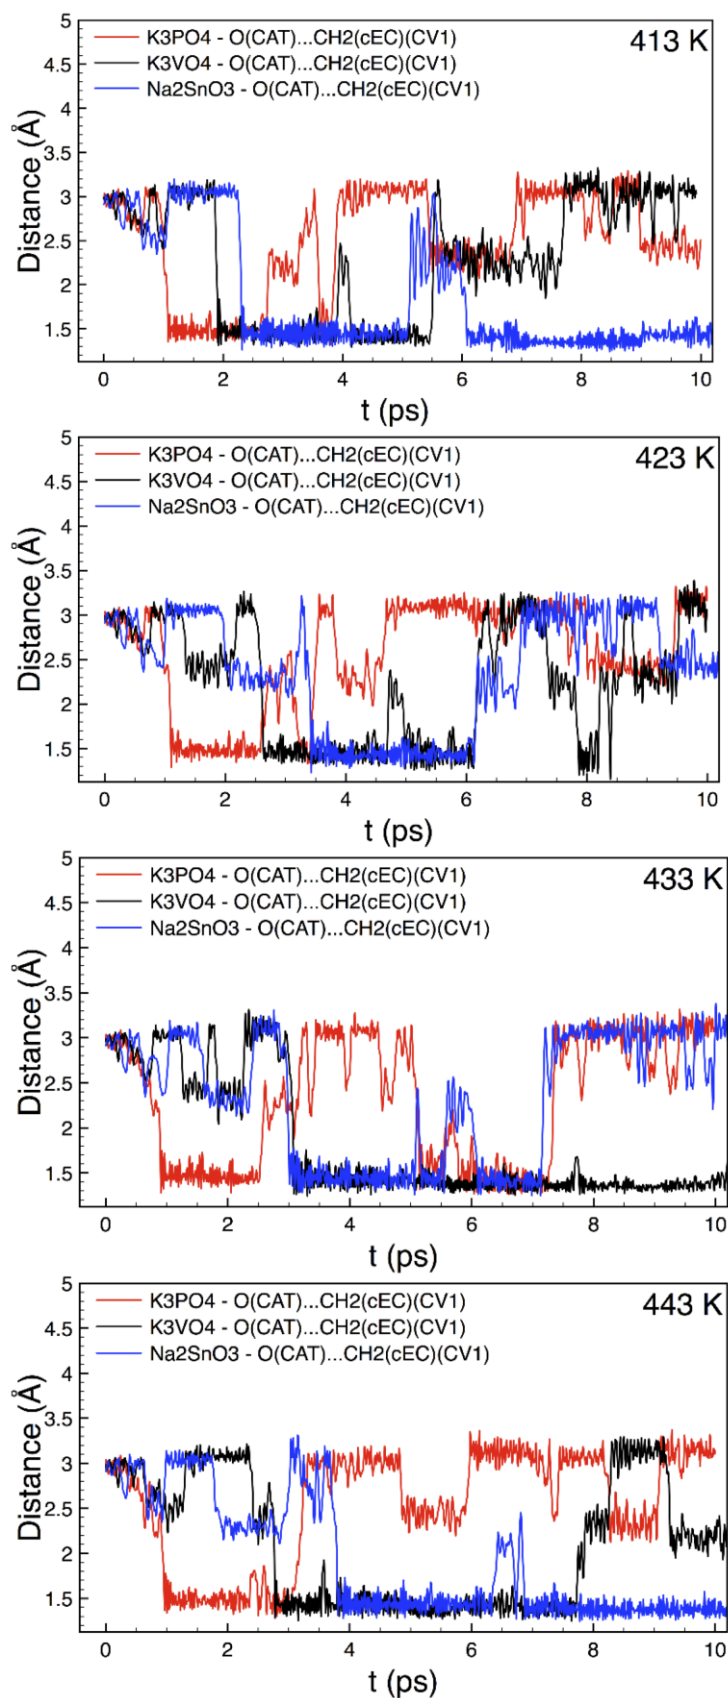

**Figure S11.** Variation of the O-(Cat)...CH<sub>2</sub> distance between the oxygen of the catalyst anion with the carbon of the CH<sub>2</sub> group connected to the ethereal oxygen (CV1) for the K<sub>3</sub>PO<sub>4</sub> (red), K<sub>3</sub>VO<sub>4</sub> (black) and Na<sub>2</sub>SnO<sub>3</sub> (blue) at 413, 423, 433 and 443 K.



The molecular structures of various states related to Figure 5 in the main text:  
 $K_3VO_4$ , important distances are shown in Å

A

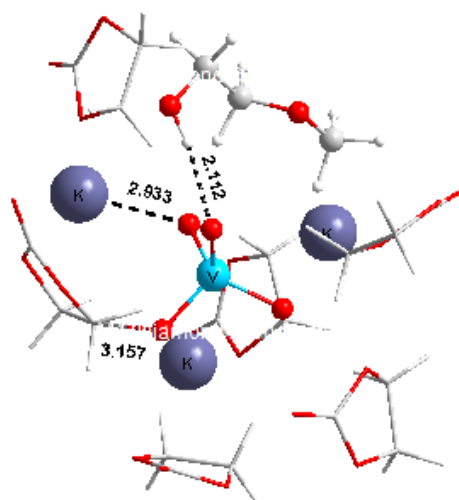

B

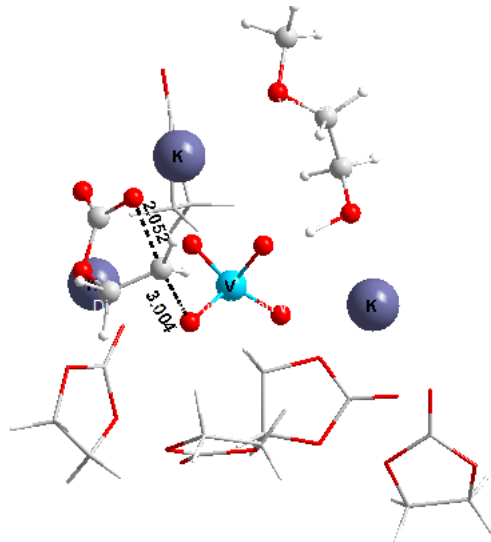

C

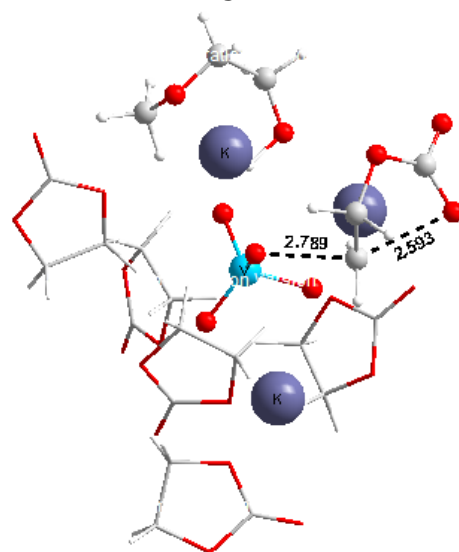

D

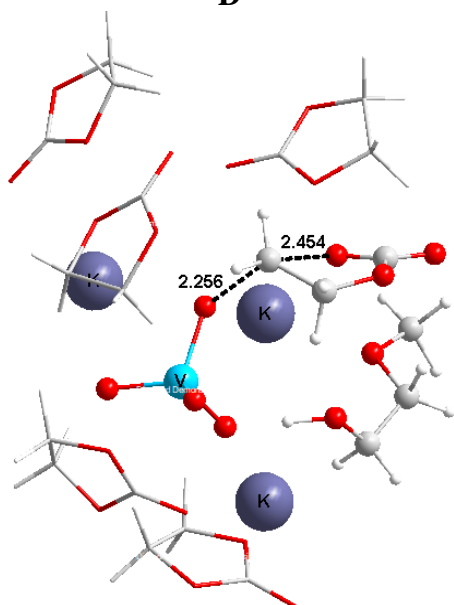

E

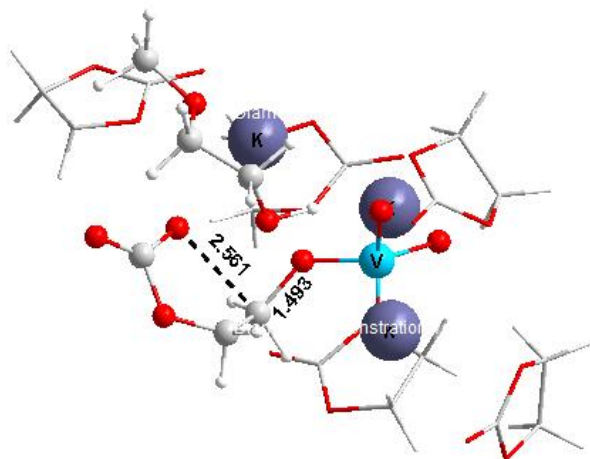

$K_3PO_4$

A

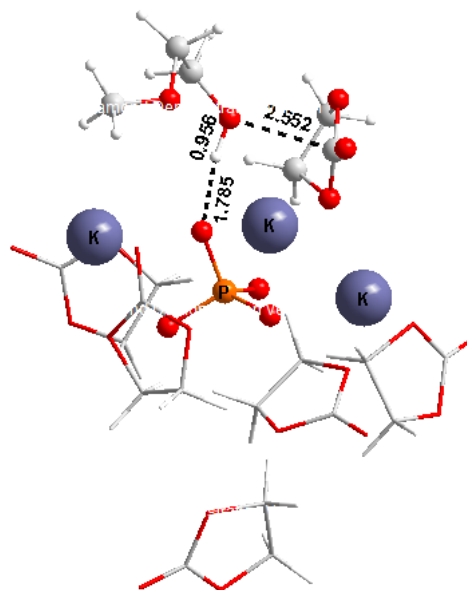

**B**

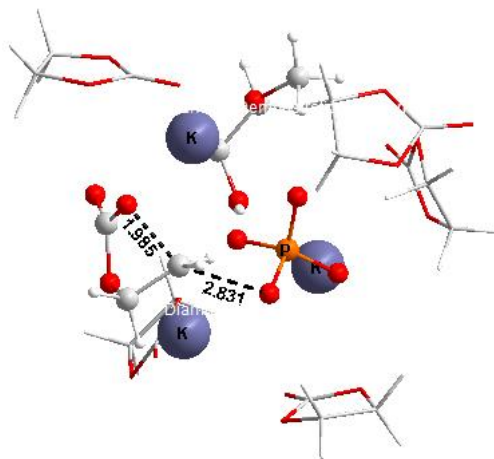

**C**

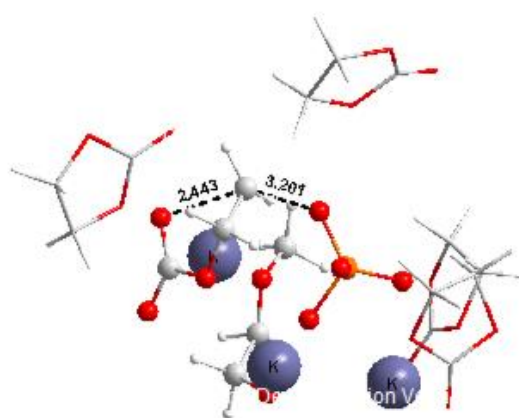

**D**

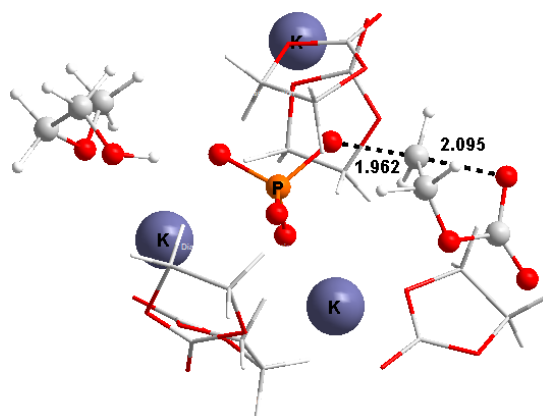

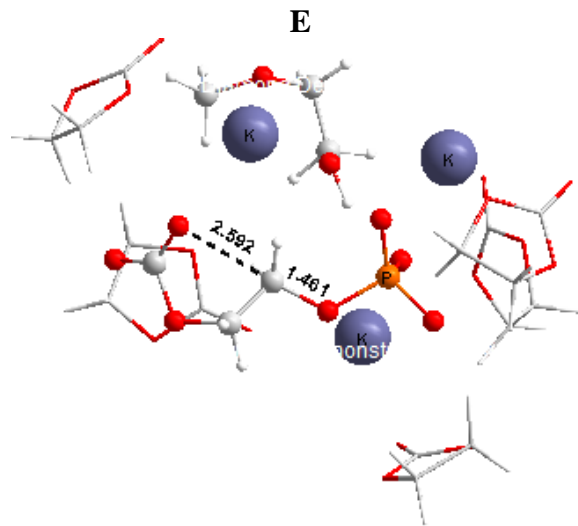

$\text{Na}_2\text{SnO}_3$

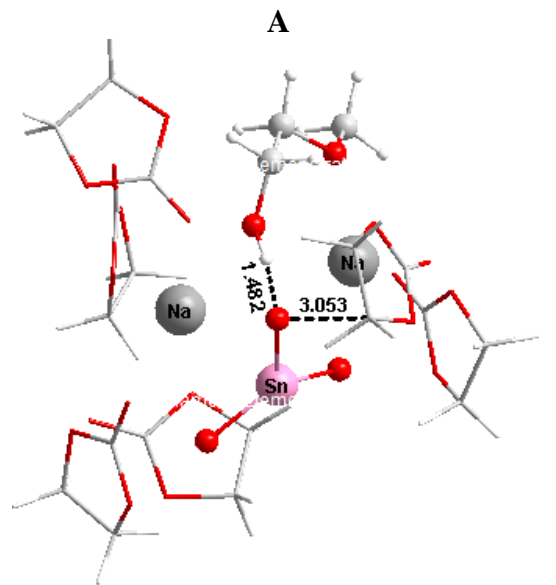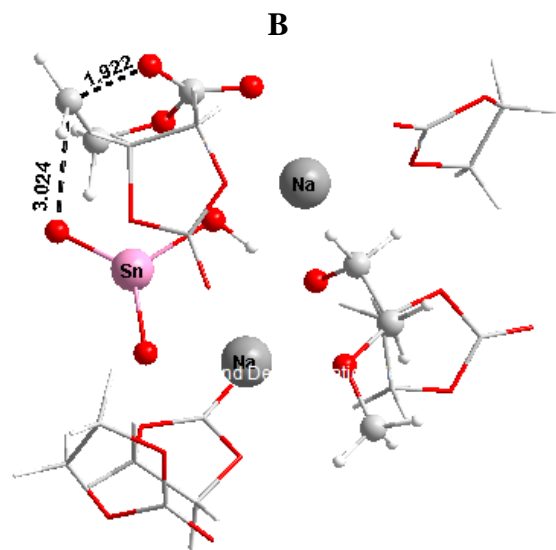

C

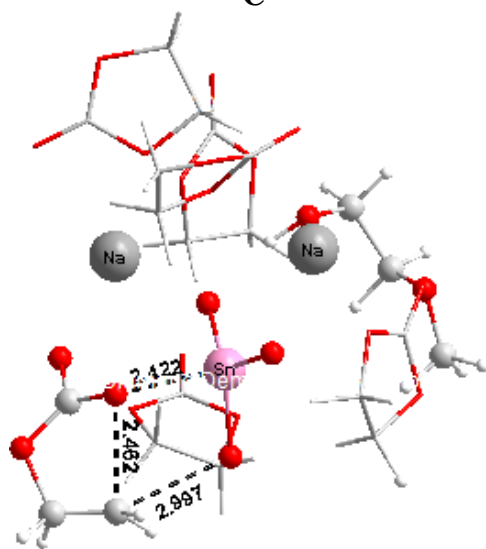

D

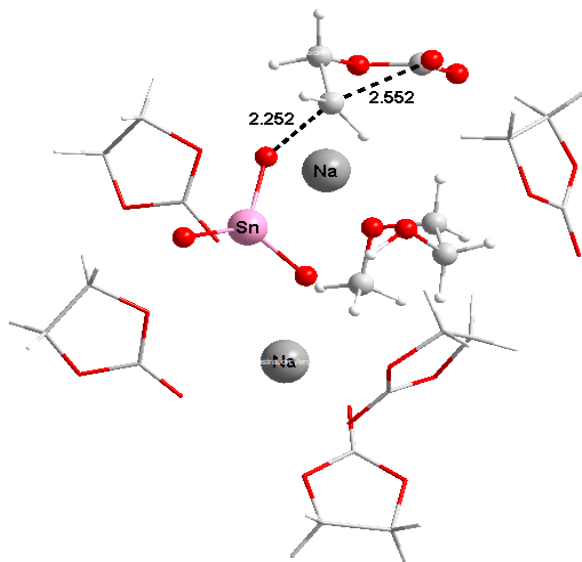

E

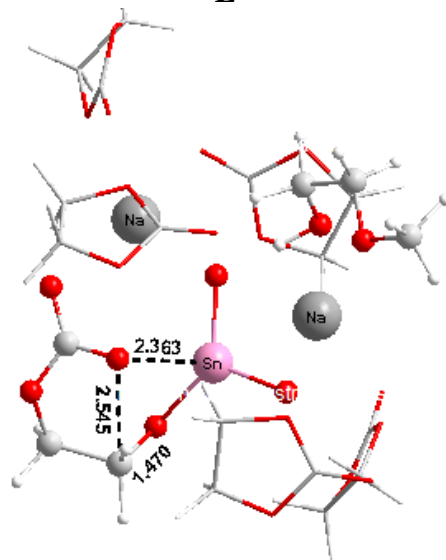

The molecular structures of various states related to Figure S3 in the SI:  
 $K_3VO_4$ , important distances are shown in Å

I-A

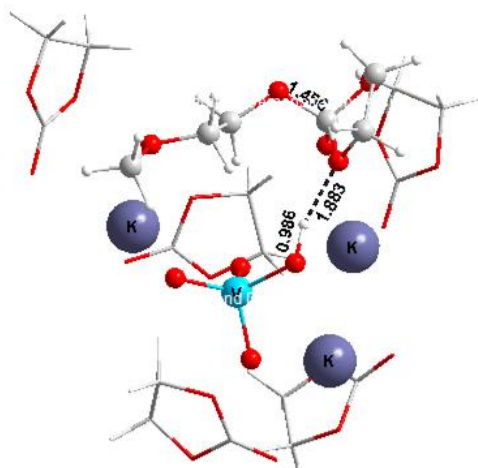

TS-A

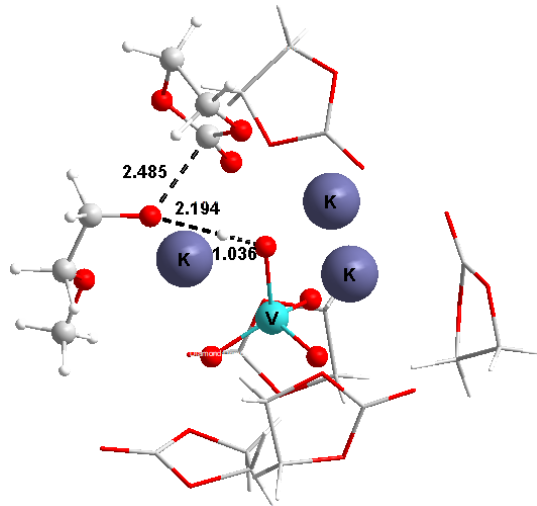

III-A

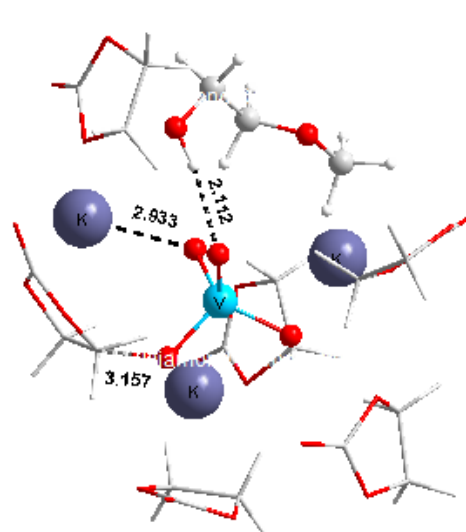

$K_3PO_4$

**I-B**

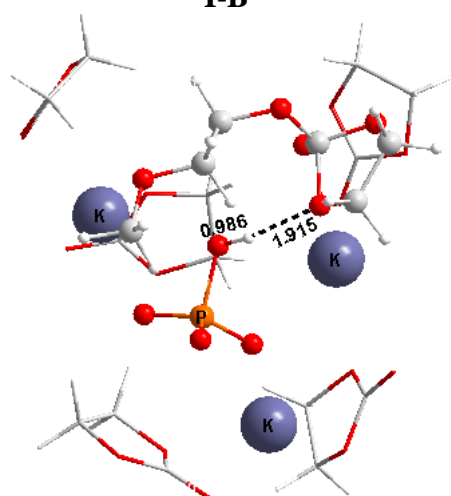

**TS1-B**

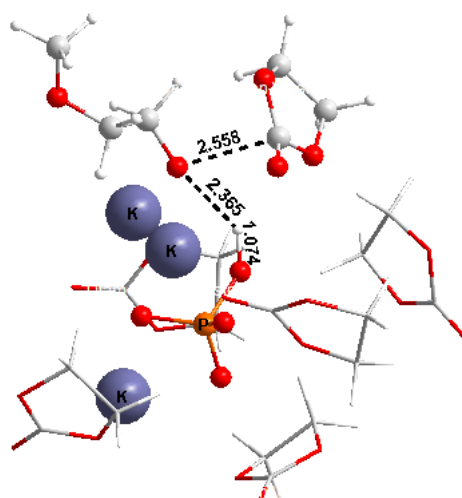

**II-B**

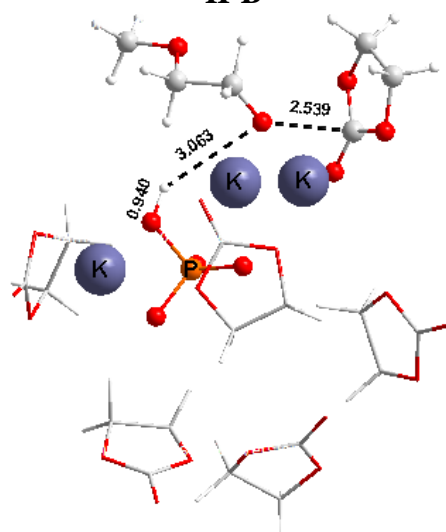

**TS2-B**

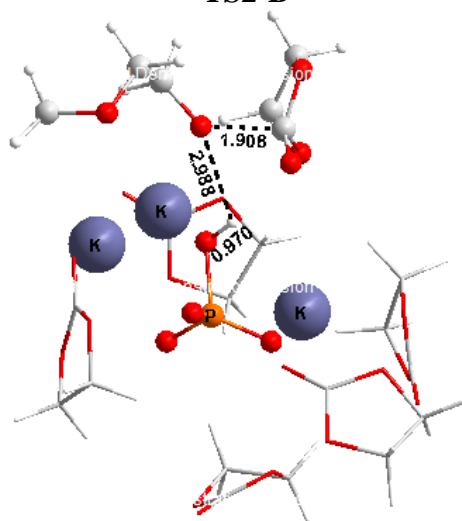

**III-B**

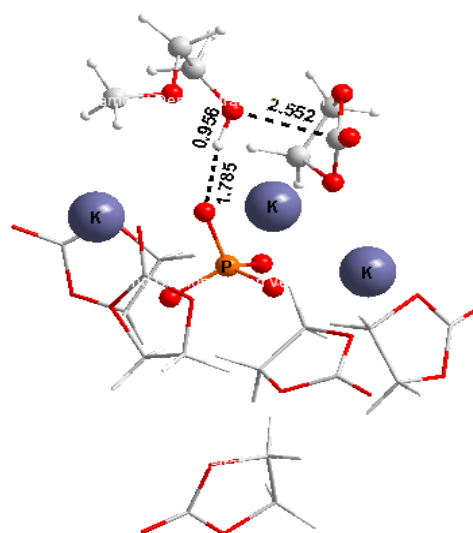

$\text{Na}_2\text{SnO}_3$

**I-C**

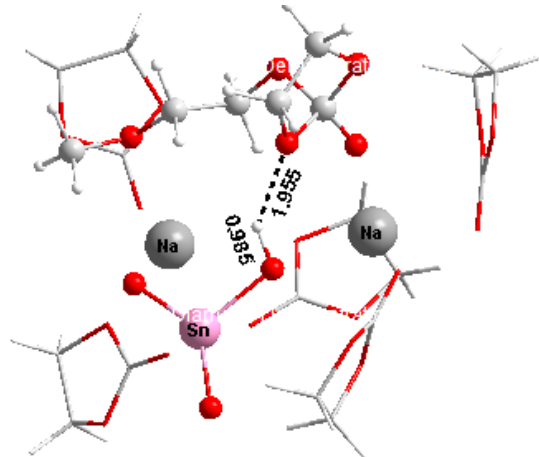



TS1-C

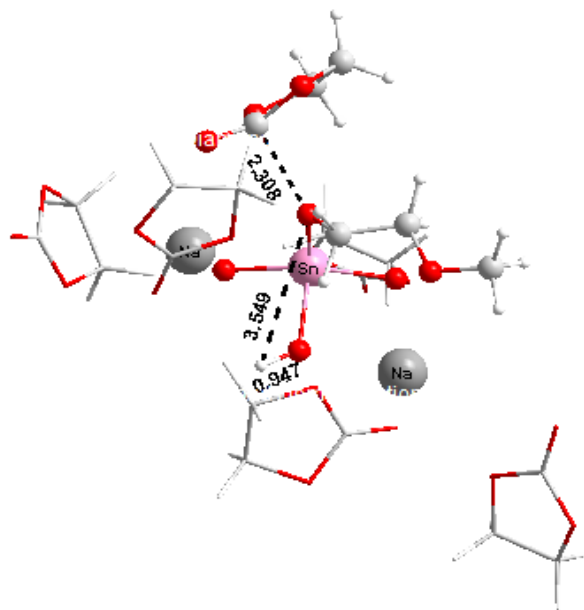

II-C

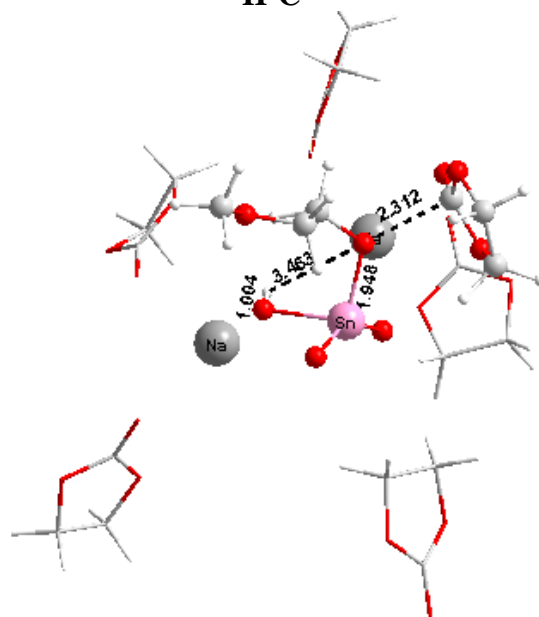

TS2-C

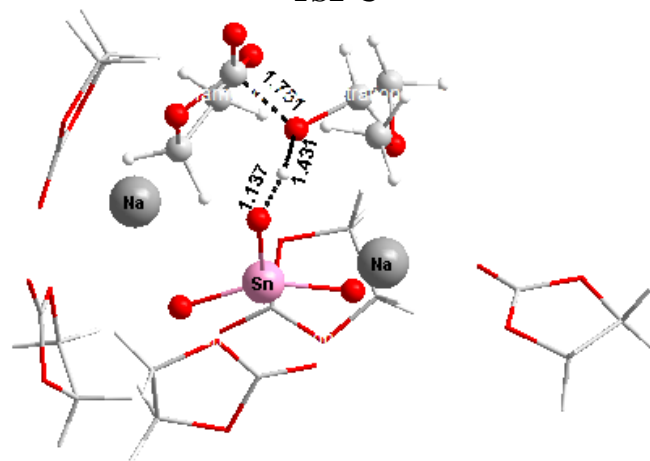

### III-C

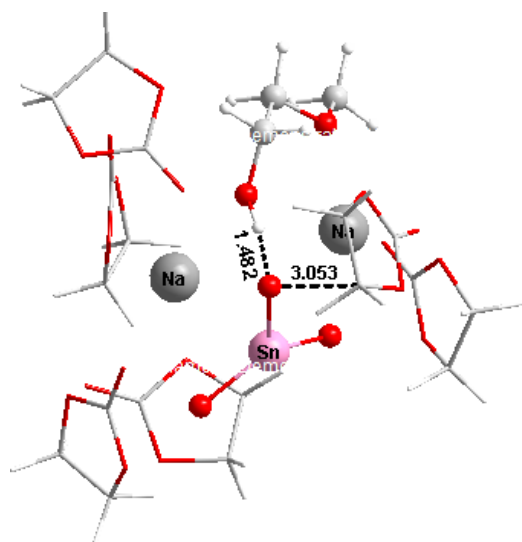

$\text{VO}(\text{O}i\text{Pr})_3$

### (I-D)

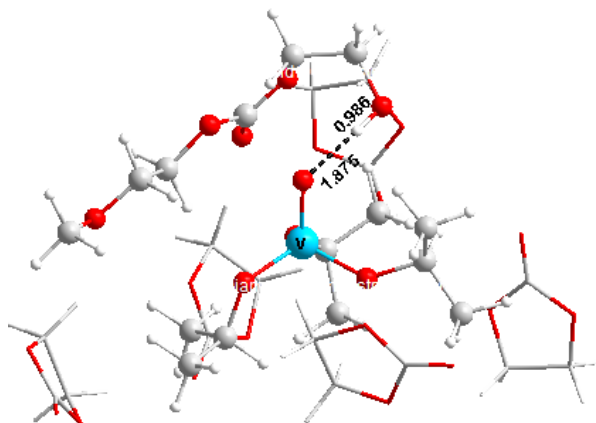

### (TS-D)

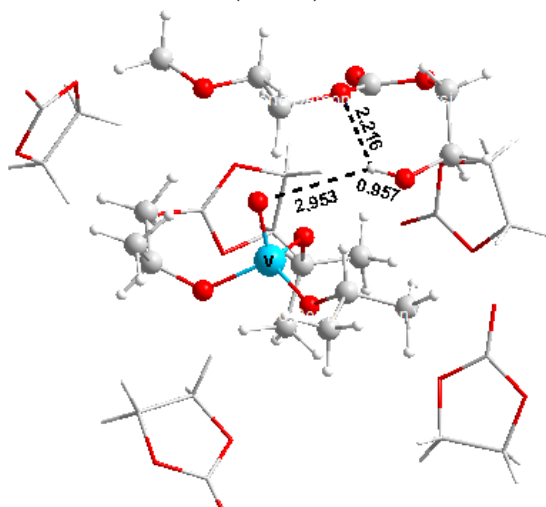

(II-D)

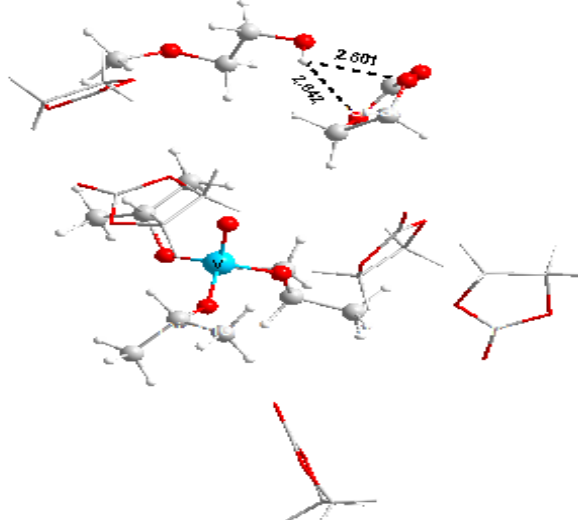

The molecular structures of various states related to Figure S4 in the SI:  
 $\text{K}_3\text{VO}_4$ , important distances are shown in Å

I-A

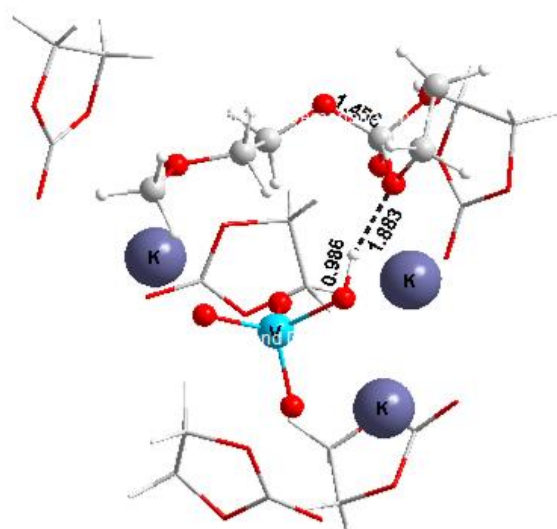

TS1-A

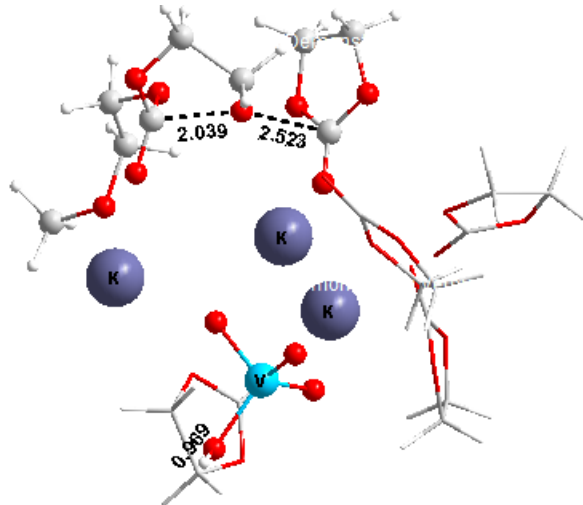

**II-A**

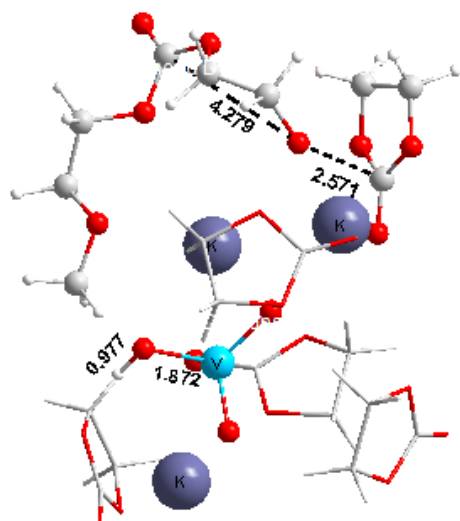

**TS2-A**

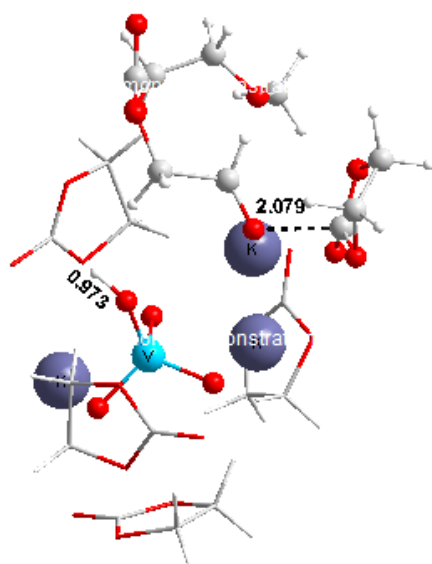

**III-A**

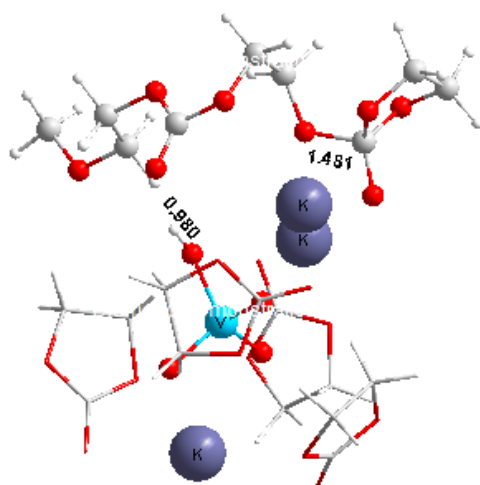

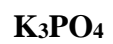

**I-B**

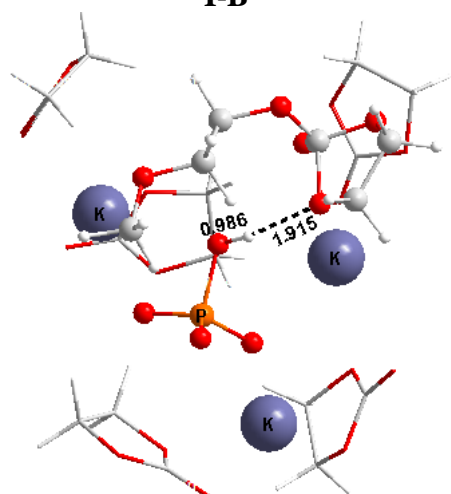

**TS1-B**

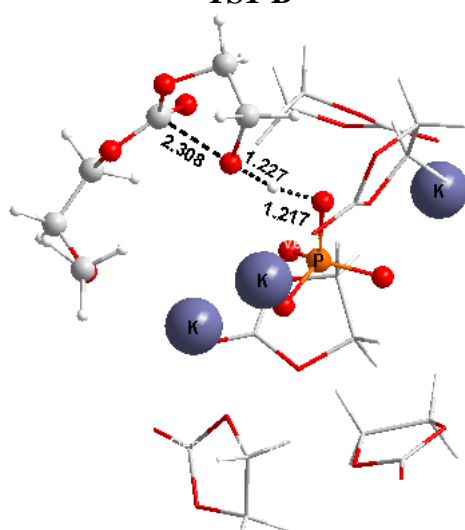

**II-B**

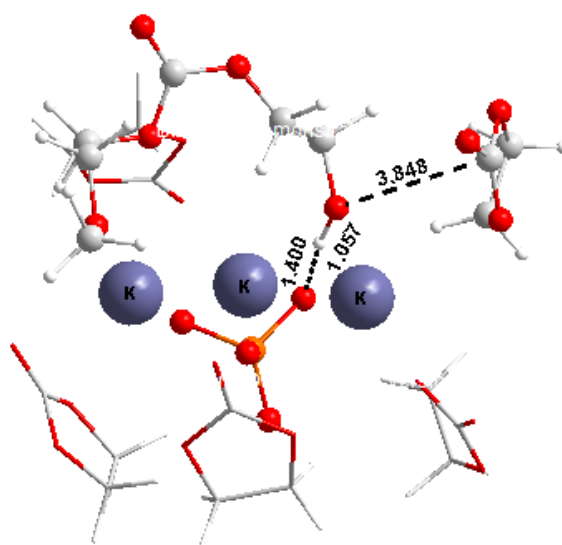

**TS2-B**

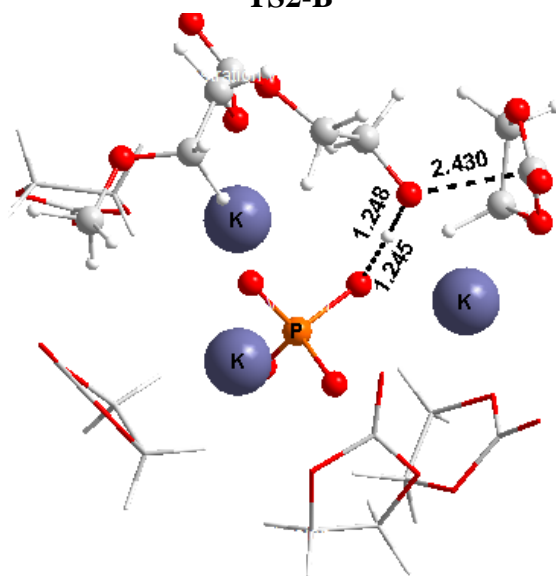

**III-B**

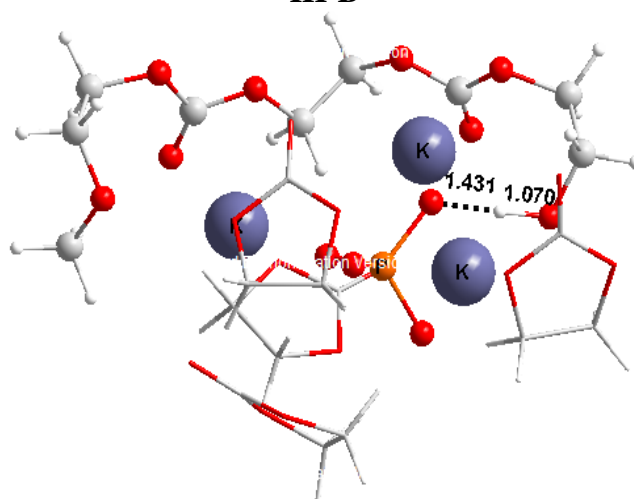

$\text{Na}_2\text{SnO}_3$

**I-C**

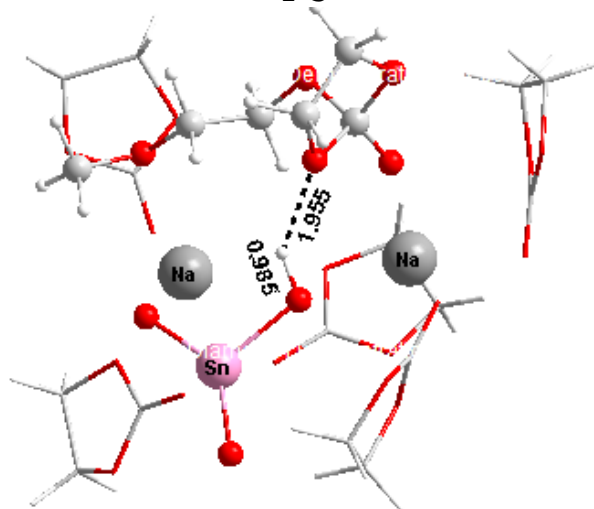

TS1-C

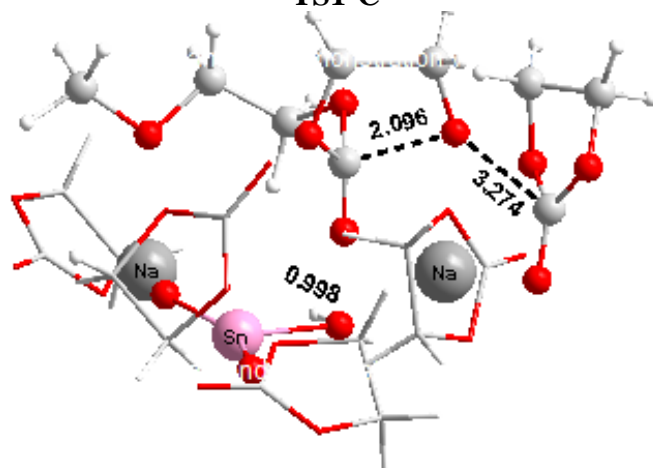

II-C

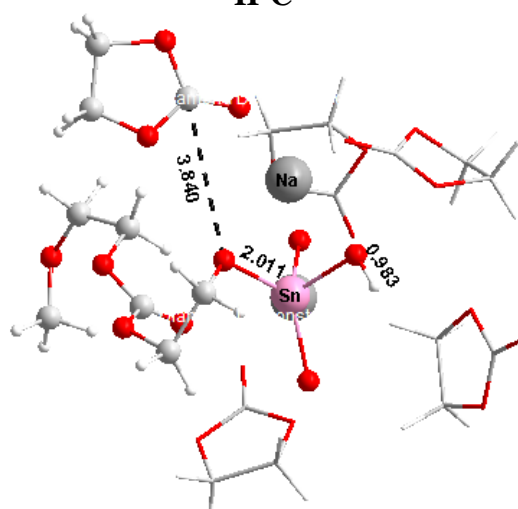

TS2-C

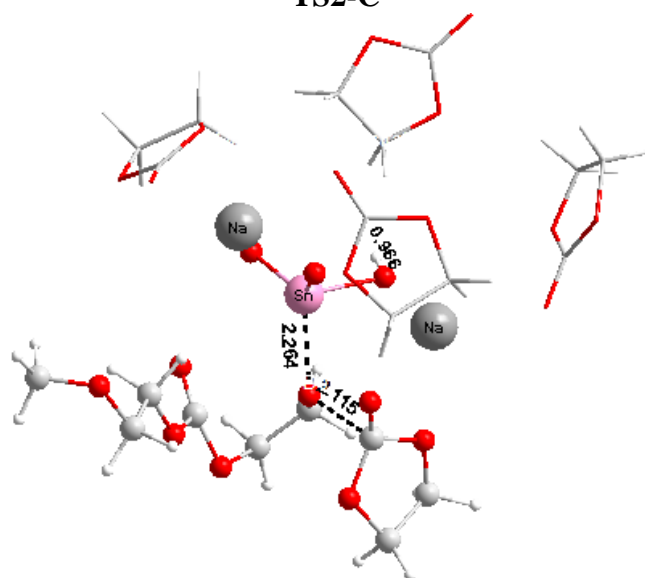

III-C

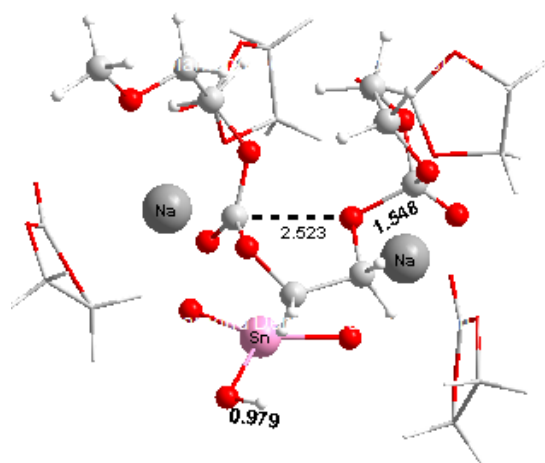

VO(O*i*Pr)<sub>3</sub>

(I-D)

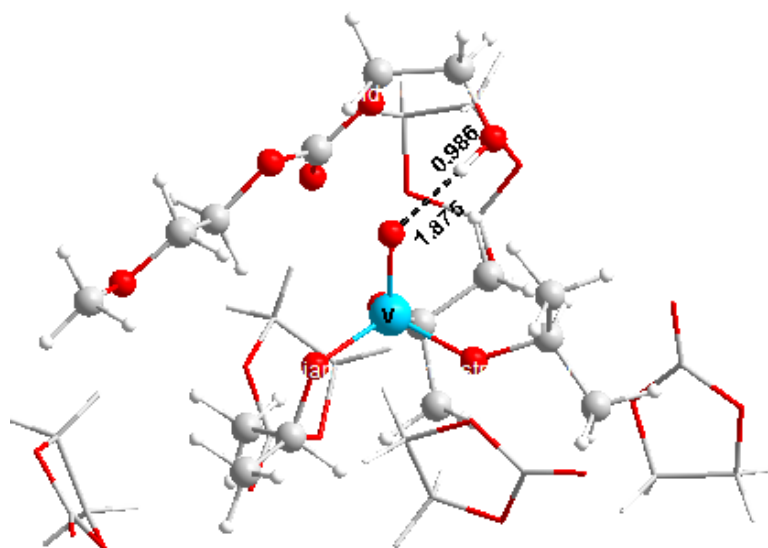

(TS-D)

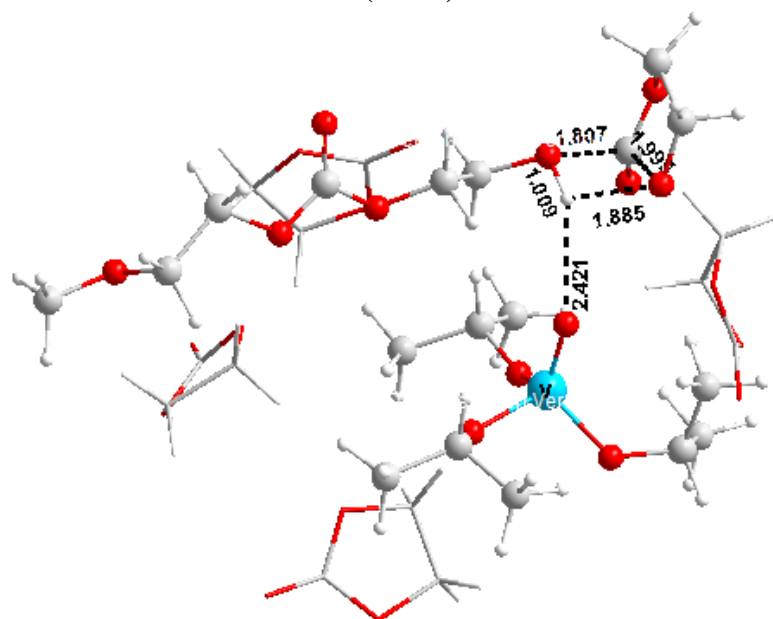



(II-D)

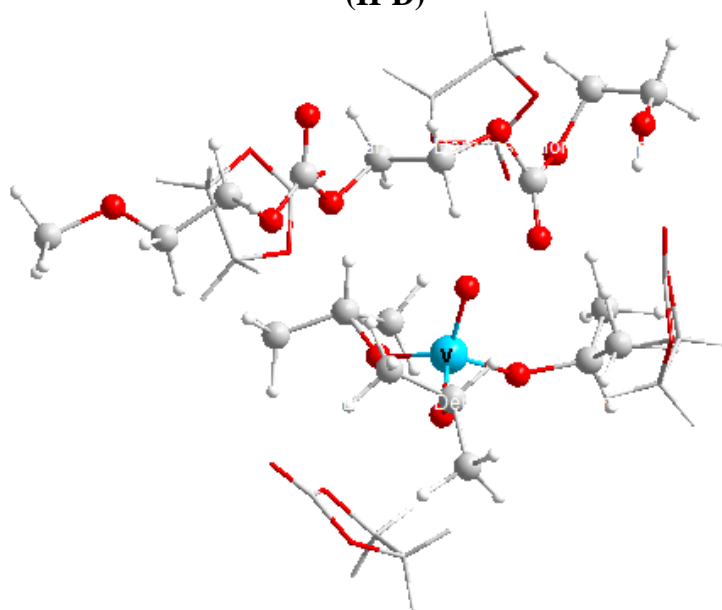

**Cartesian coordinates (in Å) related to the intermediate structure (INT) defined in Schemes 4 and 5 in the main text**

|                                    |           |           |   |           |           |           |
|------------------------------------|-----------|-----------|---|-----------|-----------|-----------|
| <b>K<sub>3</sub>VO<sub>4</sub></b> |           |           | O | -4.266354 | -2.210696 | 0.782214  |
| V                                  | -0.643754 | -0.667850 | H | -2.672907 | -1.753834 | 4.335093  |
| O                                  | -3.065752 | 3.240710  | C | -4.068881 | -2.545105 | 1.943338  |
| O                                  | -1.009517 | 4.091291  | O | -3.659796 | -3.776776 | 2.309537  |
| O                                  | -1.122761 | -2.276195 | C | -3.344658 | -3.773842 | 3.738094  |
| O                                  | -2.801731 | 4.174016  | H | -2.287390 | -4.053849 | 3.833697  |
| C                                  | -1.978773 | 3.881116  | H | -4.297802 | -2.215477 | 5.015930  |
| C                                  | -1.581618 | 2.387713  | C | -3.603610 | -2.315739 | 4.172011  |
| O                                  | -1.895963 | 2.082189  | O | -0.999018 | -0.444104 | 0.406556  |
| C                                  | -2.276394 | 3.429578  | K | -1.532134 | -3.046853 | 0.028677  |
| H                                  | -2.573229 | 4.061012  | O | 0.973506  | -0.432189 | 2.678653  |
| H                                  | -0.508268 | 2.233141  | K | 0.683194  | 1.523293  | 4.396022  |
| H                                  | -1.090400 | 4.532116  | O | 4.293359  | 4.255142  | 3.800840  |
| H                                  | -2.164551 | 1.723801  | H | 4.530392  | 6.318261  | 3.871702  |
| C                                  | 0.989659  | 2.813524  | H | 2.107660  | 6.636064  | 3.846795  |
| C                                  | -0.261903 | 3.489754  | C | 2.452215  | 5.668516  | 3.459265  |
| H                                  | 0.746279  | 1.812215  | O | 3.215180  | 2.732871  | 5.107857  |
| H                                  | 1.396038  | 3.426749  | H | 4.293133  | 5.611849  | 2.230191  |
| H                                  | -0.887445 | 2.771545  | C | 3.227532  | 3.786396  | 4.508454  |
| H                                  | 0.038969  | 4.287118  | H | 1.904823  | 5.397686  | 2.545192  |
| C                                  | 3.047378  | 1.829204  | C | 3.975647  | 5.574349  | 3.281016  |
| O                                  | 1.966698  | 2.696388  | O | 2.175259  | 4.654696  | 4.462529  |
| H                                  | 3.782180  | 1.842338  | H | -1.098465 | 0.479950  | 0.076097  |
| H                                  | 3.528607  | 2.196617  | O | 1.192524  | -3.984615 | 1.421954  |
| H                                  | 2.674236  | 0.799791  | H | 2.993612  | -3.796187 | 2.434707  |
| H                                  | -3.739200 | 3.974714  | H | 1.853810  | -4.215321 | 4.557135  |
| O                                  | -3.219443 | 1.354920  | C | 1.216342  | -3.800408 | 3.765928  |
| O                                  | -1.043503 | 1.622944  | O | -0.577957 | -5.394470 | 1.280008  |
| H                                  | -3.893816 | 0.976441  | H | 1.958400  | -2.285085 | 2.368314  |
| C                                  | -1.998334 | 1.938841  | C | 0.241327  | -4.795326 | 1.956102  |
| O                                  | -1.952821 | 2.937350  | H | 0.584339  | -2.980238 | 4.134243  |
| C                                  | -3.265460 | 3.063226  | C | 1.978496  | -3.380837 | 2.498407  |
| H                                  | -3.114712 | 3.144505  | O | 0.329866  | -4.866470 | 3.305431  |
| H                                  | -5.025369 | 1.930722  | O | -1.607147 | 0.416233  | 3.130490  |
| C                                  | -3.980747 | 1.781144  | K | -3.688058 | 0.692773  | 1.235486  |
| H                                  | -4.006628 | -4.507485 | C | -5.883537 | 4.287395  | -0.041234 |
| O                                  | -4.249482 | -1.722030 | H | -5.090396 | 4.245421  | -0.800649 |

|                                      |           |           |           |                                    |           |           |           |
|--------------------------------------|-----------|-----------|-----------|------------------------------------|-----------|-----------|-----------|
| H                                    | -6.849530 | 4.587024  | -0.470824 | O                                  | 1.923965  | 3.588498  | 5.306190  |
| O                                    | -5.952464 | 2.008743  | 2.573685  | H                                  | 4.603870  | 5.063061  | 2.419983  |
| H                                    | -4.373041 | 5.309834  | 1.177167  | C                                  | 2.423310  | 4.365185  | 4.516481  |
| H                                    | -6.031381 | 6.054152  | 1.301635  | H                                  | 2.270089  | 5.426929  | 1.881403  |
| O                                    | -5.753373 | 4.262195  | 2.311853  | C                                  | 3.998266  | 5.449297  | 3.251086  |
| C                                    | -5.456772 | 5.127583  | 1.175798  | O                                  | 1.745589  | 5.361288  | 3.885680  |
| C                                    | -5.914088 | 2.995173  | 1.859516  | H                                  | -1.343602 | 0.131953  | 1.978210  |
| O                                    | -6.044357 | 2.946132  | 0.508802  | O                                  | 1.274596  | -3.453986 | 1.909340  |
| <b>Na<sub>2</sub>SnO<sub>3</sub></b> |           |           |           |                                    |           |           |           |
| Sn                                   | -0.343478 | -1.419458 | 3.739257  | H                                  | 3.272144  | -3.819679 | 2.365623  |
| O                                    | -3.028796 | 2.690002  | 1.716006  | H                                  | 2.627626  | -5.299180 | 4.221059  |
| O                                    | -1.202122 | 3.524303  | 0.518538  | C                                  | 1.840808  | -4.639026 | 3.834161  |
| O                                    | -0.877047 | -3.073951 | 4.444438  | O                                  | -0.322747 | -4.903926 | 1.158816  |
| O                                    | -3.074536 | 2.848322  | -0.590714 | H                                  | 2.447288  | -2.548244 | 3.364657  |
| C                                    | -2.323817 | 2.239991  | -1.647705 | C                                  | 0.554218  | -4.626964 | 1.945476  |
| C                                    | -1.683110 | 0.985036  | -0.994037 | H                                  | 1.202951  | -4.235259 | 4.637228  |
| O                                    | -1.818477 | 1.206573  | 0.416139  | C                                  | 2.349218  | -3.541523 | 2.896147  |
| C                                    | -2.350291 | 2.610701  | 0.635717  | O                                  | 0.978894  | -5.428964 | 2.959657  |
| H                                    | -3.021621 | 1.990994  | -2.459811 | Na                                 | -3.797218 | 0.515598  | 2.109329  |
| H                                    | -0.621840 | 0.879671  | -1.273810 | C                                  | -5.879637 | 3.965891  | 0.262227  |
| H                                    | -1.554694 | 2.934007  | -2.022082 | H                                  | -5.218315 | 3.811884  | -0.600526 |
| H                                    | -2.215159 | 0.056448  | -1.252460 | H                                  | -6.877253 | 4.311257  | -0.042952 |
| C                                    | 0.918438  | 2.570951  | 1.216406  | O                                  | -5.812882 | 1.893666  | 3.040046  |
| C                                    | -0.286473 | 3.431771  | 1.605290  | H                                  | -4.134275 | 4.873920  | 1.236015  |
| H                                    | 0.612470  | 1.521078  | 1.071077  | H                                  | -5.666569 | 5.838500  | 1.441311  |
| H                                    | 1.349003  | 2.939550  | 0.267322  | O                                  | -5.512261 | 4.105408  | 2.577870  |
| H                                    | -0.795095 | 3.030803  | 2.499439  | C                                  | -5.227654 | 4.837022  | 1.347643  |
| H                                    | 0.049053  | 4.452062  | 1.853753  | C                                  | -5.781765 | 2.815985  | 2.241826  |
| C                                    | 3.024345  | 1.784490  | 2.009190  | O                                  | -6.040007 | 2.676026  | 0.922445  |
| O                                    | 1.905587  | 2.660722  | 2.269683  | <b>K<sub>3</sub>PO<sub>4</sub></b> |           |           |           |
| H                                    | 3.770740  | 1.984007  | 2.791532  | P                                  | 0.229621  | -0.236090 | 1.999329  |
| H                                    | 3.465955  | 2.002730  | 1.021572  | O                                  | -3.048779 | 2.968920  | 1.306796  |
| H                                    | 2.704865  | 0.727785  | 2.065019  | O                                  | -1.671031 | 4.453247  | 0.122722  |
| H                                    | -2.835912 | 4.586864  | 5.087198  | O                                  | -0.924414 | -1.263173 | 1.816612  |
| O                                    | -3.222839 | 1.423084  | 5.667992  | O                                  | -3.542271 | 3.599552  | -0.864197 |
| O                                    | -1.028848 | 0.796712  | 5.659140  | C                                  | -2.871167 | 3.481258  | -2.121541 |
| H                                    | -4.846200 | 2.505836  | 4.938938  | C                                  | -1.779169 | 2.386171  | -1.898784 |
| C                                    | -1.907563 | 1.627220  | 5.470748  | O                                  | -1.812092 | 2.112412  | -0.500480 |
| O                                    | -1.639232 | 2.882570  | 5.026955  | C                                  | -2.586869 | 3.305245  | 0.182323  |
| C                                    | -2.912752 | 3.553808  | 4.726031  | H                                  | -3.618945 | 3.193140  | -2.874294 |
| H                                    | -3.052031 | 3.512453  | 3.633252  | H                                  | -0.786115 | 2.752387  | -2.212564 |
| H                                    | -4.142903 | 3.086697  | 6.509286  | H                                  | -2.414918 | 4.441762  | -2.408722 |
| C                                    | -3.924092 | 2.702518  | 5.502785  | H                                  | -2.000320 | 1.458015  | -2.448781 |
| H                                    | -4.052184 | -5.541381 | 2.163120  | C                                  | 0.669137  | 3.852989  | 0.321771  |
| O                                    | -4.092996 | -2.501264 | 3.159993  | C                                  | -0.579181 | 4.376403  | 1.041962  |
| O                                    | -4.729101 | -1.474249 | 1.240858  | H                                  | 0.442864  | 2.876541  | -0.134215 |
| H                                    | -2.723600 | -3.744944 | 4.102718  | H                                  | 0.960036  | 4.543324  | -0.493916 |
| C                                    | -4.357222 | -2.476690 | 1.835293  | H                                  | -0.840817 | 3.720722  | 1.888703  |
| O                                    | -4.163976 | -3.677913 | 1.246852  | H                                  | -0.404615 | 5.389939  | 1.438803  |
| C                                    | -3.525608 | -4.579033 | 2.211168  | C                                  | 2.779911  | 2.842446  | 0.731839  |
| H                                    | -2.475143 | -4.702276 | 1.908322  | O                                  | 1.758401  | 3.715979  | 1.257247  |
| H                                    | -4.484723 | -4.262557 | 4.187150  | H                                  | 3.611496  | 2.858026  | 1.451620  |
| C                                    | -3.683117 | -3.852449 | 3.558208  | H                                  | 3.152492  | 3.213180  | -0.240251 |
| O                                    | -1.754311 | -0.351319 | 2.731870  | H                                  | 2.396885  | 1.809067  | 0.615391  |
| O                                    | 1.280467  | -0.430940 | 3.612544  | H                                  | -3.318368 | 2.032175  | 5.100531  |
| Na                                   | 0.890902  | 1.640756  | 4.359549  | O                                  | -1.587344 | -0.229256 | 5.770946  |
| O                                    | 3.738546  | 4.351228  | 4.168553  | O                                  | 0.240449  | 0.884699  | 6.574912  |
| H                                    | 4.553333  | 6.226488  | 3.796481  | H                                  | -2.078703 | -0.468551 | 3.770233  |
| H                                    | 2.453456  | 6.979184  | 2.791340  | C                                  | -0.769889 | 0.845882  | 5.905243  |
| C                                    | 2.589189  | 5.890419  | 2.826299  | O                                  | -1.238245 | 1.917239  | 5.188036  |
|                                      |           |           |           | C                                  | -2.500937 | 1.554082  | 4.543041  |

|                             |           |           |           |   |           |           |           |
|-----------------------------|-----------|-----------|-----------|---|-----------|-----------|-----------|
| H                           | -2.470921 | 1.928768  | 3.509899  | H | -1.328060 | 2.733190  | -2.684368 |
| H                           | -3.486850 | -0.385188 | 4.918129  | H | -1.729311 | 0.406180  | -3.185403 |
| C                           | -2.504766 | 0.026102  | 4.658843  | H | -0.450007 | 1.755936  | -1.461264 |
| H                           | -2.916559 | -5.540689 | 1.852400  | H | -3.250488 | 1.050870  | -2.528190 |
| O                           | -3.530627 | -2.756133 | 1.664039  | C | 1.949982  | 3.269582  | 1.080642  |
| O                           | -3.025253 | -2.361016 | -0.524521 | C | 0.512226  | 3.707472  | 1.328426  |
| H                           | -2.056093 | -2.845078 | 3.120220  | H | 2.006828  | 2.164449  | 1.059312  |
| C                           | -2.894319 | -3.014423 | 0.493544  | H | 2.296323  | 3.645786  | 0.099669  |
| O                           | -2.084458 | -4.106551 | 0.594382  | H | 0.095049  | 3.255069  | 2.239070  |
| C                           | -2.241210 | -4.676866 | 1.936102  | H | 0.421879  | 4.801604  | 1.393806  |
| H                           | -1.244503 | -4.975396 | 2.286487  | C | 4.113310  | 3.390088  | 2.006691  |
| H                           | -3.580051 | -3.793639 | 3.470275  | O | 2.745644  | 3.802442  | 2.139420  |
| C                           | -2.837522 | -3.506706 | 2.715969  | H | 4.654872  | 3.791335  | 2.873762  |
| O                           | -0.507138 | 1.274718  | 1.873556  | H | 4.558083  | 3.777389  | 1.072877  |
| K                           | 0.435603  | -2.567961 | -0.050133 | H | 4.197851  | 2.287915  | 2.008012  |
| O                           | 1.250116  | -0.325209 | 0.861235  | H | -2.566777 | 5.629670  | 4.630021  |
| K                           | 1.193299  | 2.358701  | 3.824529  | O | -2.827892 | 3.246343  | 6.343652  |
| O                           | 3.992856  | 5.382214  | 2.551025  | O | -0.613563 | 2.840120  | 6.689575  |
| H                           | 4.635068  | 7.134629  | 1.647139  | H | -4.090477 | 2.952061  | 4.708317  |
| H                           | 2.355131  | 7.969865  | 1.648977  | C | -1.507615 | 3.314867  | 6.022082  |
| C                           | 2.428749  | 6.874749  | 1.610383  | O | -1.313748 | 3.984414  | 4.844723  |
| O                           | 2.680287  | 4.679295  | 4.269861  | C | -2.585647 | 4.553176  | 4.406337  |
| H                           | 4.063332  | 5.841052  | 0.530762  | H | -2.678520 | 4.388680  | 3.324906  |
| C                           | 2.864274  | 5.402461  | 3.313125  | H | -4.403659 | 4.427568  | 5.668918  |
| H                           | 1.765893  | 6.474477  | 0.830214  | C | -3.619479 | 3.787375  | 5.243884  |
| C                           | 3.876023  | 6.356409  | 1.482874  | H | -6.618346 | -4.355214 | 4.729776  |
| O                           | 1.985347  | 6.349036  | 2.886855  | O | -4.712279 | -2.381729 | 3.720720  |
| H                           | -0.696669 | 1.509916  | 0.935351  | O | -4.740427 | -2.967777 | 1.513314  |
| O                           | 2.378899  | -3.091461 | 3.244825  | H | -3.783697 | -3.300105 | 5.337749  |
| H                           | 3.129737  | -2.857066 | 5.164192  | C | -4.904153 | -3.250029 | 2.674149  |
| H                           | 0.880231  | -3.216388 | 6.049592  | O | -5.295016 | -4.482813 | 3.130744  |
| C                           | 0.907157  | -2.741056 | 5.060978  | C | -5.532441 | -4.405553 | 4.560117  |
| O                           | 0.991479  | -4.389439 | 2.005609  | H | -5.120803 | -5.310799 | 5.026824  |
| H                           | 2.446126  | -1.354904 | 4.367385  | H | -5.358260 | -2.501357 | 5.689650  |
| C                           | 1.236372  | -3.770916 | 3.033721  | C | -4.803784 | -3.115751 | 4.967296  |
| H                           | 0.269133  | -1.848197 | 5.015114  | O | 0.243795  | -0.242602 | 0.061690  |
| C                           | 2.326013  | -2.431749 | 4.548889  | O | 1.696950  | -0.143494 | 2.420837  |
| O                           | 0.391805  | -3.710392 | 4.089839  | O | 4.157448  | 4.046626  | 5.300326  |
| O                           | 0.782175  | -0.163254 | 3.421876  | H | 3.032222  | 5.764059  | 5.610280  |
| K                           | -3.131114 | 0.195734  | 0.980785  | H | 2.733065  | 4.695016  | 7.776119  |
| C                           | -6.175481 | 3.234991  | 0.999179  | C | 2.460175  | 4.065641  | 6.916667  |
| H                           | -5.591837 | 3.512958  | 0.110093  | O | 5.139733  | 2.088051  | 5.944219  |
| H                           | -7.256665 | 3.321110  | 0.822825  | H | 2.189620  | 4.425180  | 4.748125  |
| O                           | -5.106363 | 0.656764  | 3.061432  | C | 4.267507  | 2.914716  | 6.068823  |
| H                           | -4.716005 | 4.446182  | 2.102294  | H | 1.398723  | 3.782144  | 6.959457  |
| H                           | -6.431193 | 4.662815  | 2.686370  | C | 2.874892  | 4.677839  | 5.571208  |
| O                           | -5.489985 | 2.894955  | 3.231577  | O | 3.255476  | 2.846963  | 6.984976  |
| C                           | -5.692789 | 3.969523  | 2.263812  | H | -1.384490 | -0.305727 | -0.866625 |
| C                           | -5.463660 | 1.715212  | 2.571554  | O | 2.573738  | -4.727889 | 1.453468  |
| O                           | -5.891224 | 1.832589  | 1.288838  | H | 4.028277  | -3.583132 | 2.398379  |
| <b>VO(OiPr)<sub>3</sub></b> |           |           |           | H | 2.691402  | -3.499631 | 4.428940  |
| V                           | 0.088313  | -0.391983 | 1.671772  | C | 2.117857  | -3.699360 | 3.514230  |
| O                           | -2.200930 | 3.826281  | 1.159007  | O | 1.565779  | -6.723687 | 1.920223  |
| O                           | -0.226439 | 3.226533  | 0.165845  | H | 2.676926  | -2.657148 | 1.646889  |
| O                           | -0.522780 | -1.994273 | 2.080009  | C | 1.926312  | -5.625846 | 2.264152  |
| O                           | -2.200826 | 2.724383  | -0.791373 | H | 1.204122  | -3.087131 | 3.492320  |
| C                           | -1.441383 | 2.030065  | -1.843857 | C | 2.942418  | -3.554105 | 2.223906  |
| C                           | -2.213837 | 0.788798  | -2.264418 | O | 1.730786  | -5.098421 | 3.516600  |
| O                           | -2.287614 | -0.203988 | -1.249814 | O | -1.064685 | 0.806636  | 2.261384  |
| C                           | -1.569414 | 3.293633  | 0.255250  | C | -5.597213 | 3.127590  | 0.221325  |

|   |           |           |           |   |           |           |           |
|---|-----------|-----------|-----------|---|-----------|-----------|-----------|
| H | -4.687476 | 2.597161  | -0.097420 | H | -2.479041 | 1.967689  | 3.116499  |
| H | -6.303975 | 3.218126  | -0.613940 | H | 4.042689  | 0.433999  | 3.590987  |
| O | -6.143948 | 2.379707  | 3.551684  | H | 3.698237  | -1.307644 | 3.725226  |
| H | -4.278262 | 4.834276  | 0.670669  | H | 3.646821  | -0.259418 | 5.173410  |
| H | -6.050043 | 5.227414  | 0.754366  | H | 2.169775  | 2.137424  | 3.856834  |
| O | -5.288690 | 4.101356  | 2.326509  | H | 1.671768  | 1.444278  | 5.430176  |
| C | -5.280501 | 4.458838  | 0.914550  | H | 0.492930  | 1.596892  | 4.111202  |
| C | -5.917569 | 2.893293  | 2.478768  | H | -0.324443 | -2.684257 | -0.524344 |
| O | -6.239287 | 2.349900  | 1.271769  | H | -1.218958 | -4.219166 | -0.398558 |
| C | 1.935878  | -0.017960 | 3.855487  | H | 0.353947  | -4.042067 | 0.421099  |
| C | 1.543354  | 1.373616  | 4.340229  | H | -2.094409 | -3.669703 | 3.296795  |
| C | 3.415326  | -0.313734 | 4.098505  | H | -0.730799 | -4.656800 | 2.703823  |
| H | 1.314678  | -0.775186 | 4.368212  | H | -2.342634 | -4.824192 | 1.960308  |
| C | -1.312309 | -3.012816 | 1.383199  | H | -2.071369 | -0.915545 | 4.124091  |
| H | -2.247147 | -2.517143 | 1.074459  | H | -3.224257 | 0.250546  | 4.820873  |
| C | -1.632565 | -4.106474 | 2.398921  | H | -1.472112 | 0.565872  | 4.933067  |
| C | -0.572719 | -3.516639 | 0.150000  | H | -3.333402 | -0.712205 | 1.859035  |
| C | -2.337578 | 0.886770  | 2.951132  | H | -3.401275 | 0.872419  | 1.058818  |
| C | -2.264477 | 0.154983  | 4.290009  | H | -4.424325 | 0.531442  | 2.494459  |
| C | -3.438619 | 0.367837  | 2.034040  |   |           |           |           |

**Cartesian coordinates (in Å) related to various states in Figure 5 in the main text**

|                                    |           |           |           |   |           |           |           |
|------------------------------------|-----------|-----------|-----------|---|-----------|-----------|-----------|
| <b>K<sub>3</sub>VO<sub>4</sub></b> |           |           |           | O | -5.319032 | 1.021319  | 5.004481  |
| <b>A</b>                           |           |           |           | H | -2.949385 | 3.177299  | 7.740167  |
| V                                  | -1.333322 | 0.825912  | 2.557013  | C | -4.593630 | 1.854443  | 5.505563  |
| O                                  | 2.249045  | -4.030517 | 2.183470  | O | -4.656294 | 3.194138  | 5.156733  |
| O                                  | 1.187242  | -1.772104 | 0.794900  | C | -3.423120 | 3.823129  | 5.602832  |
| O                                  | -2.314178 | 0.360111  | 3.876230  | H | -3.750538 | 4.808610  | 5.919367  |
| O                                  | 0.077400  | -4.013276 | 1.392260  | H | -1.829908 | 2.656168  | 6.545069  |
| C                                  | -0.518876 | -4.036918 | 0.045146  | C | -2.891111 | 2.836301  | 6.693991  |
| C                                  | 0.719605  | -4.090765 | -0.843712 | O | -1.401268 | -0.299777 | 1.307917  |
| O                                  | 1.838233  | -4.475615 | -0.085437 | K | 0.155466  | -2.267494 | 3.483244  |
| C                                  | 1.491198  | -4.176493 | 1.274879  | O | 0.371106  | 0.615646  | 2.991916  |
| H                                  | -1.062895 | -4.985754 | 0.074152  | K | -1.524129 | 1.820763  | -0.278605 |
| H                                  | 0.925460  | -3.060332 | -1.183796 | O | -0.270703 | 4.012581  | 5.244793  |
| H                                  | -1.258489 | -3.225226 | -0.000061 | H | -1.048889 | 3.617146  | 3.311398  |
| H                                  | 0.670435  | -4.786888 | -1.725099 | H | 0.913562  | 2.332351  | 3.077026  |
| C                                  | 2.396929  | 0.320170  | 0.657300  | C | 1.124472  | 3.394289  | 3.369066  |
| C                                  | 2.266802  | -1.111501 | 0.199863  | O | 1.364498  | 3.972147  | 6.863973  |
| H                                  | 1.805570  | 0.402717  | 1.606385  | H | -0.143953 | 5.185542  | 3.420215  |
| H                                  | 3.491355  | 0.579465  | 0.747923  | C | 0.994978  | 3.833229  | 5.675425  |
| H                                  | 2.269262  | -1.281891 | -0.892049 | H | 1.720029  | 4.001849  | 2.692653  |
| H                                  | 3.202482  | -1.588722 | 0.622594  | C | -0.170975 | 4.111069  | 3.778707  |
| C                                  | 1.905610  | 2.563329  | 0.120843  | O | 1.861722  | 3.424168  | 4.678273  |
| O                                  | 1.801441  | 1.242490  | -0.244381 | H | 0.494644  | -1.160577 | 0.951656  |
| H                                  | 1.520488  | 3.157427  | -0.821368 | O | 1.552782  | -0.672347 | 7.121030  |
| H                                  | 2.940139  | 2.882637  | 0.313213  | H | 0.430621  | 0.587698  | 8.428397  |
| H                                  | 1.244517  | 2.833064  | 0.996115  | H | -1.334639 | 0.703857  | 6.741655  |
| H                                  | -5.266900 | 6.102712  | 1.140066  | C | -0.315859 | 0.582313  | 6.310196  |
| O                                  | -4.119305 | 3.507773  | 0.616374  | O | 1.395115  | -2.327108 | 5.581879  |
| O                                  | -5.577626 | 2.000174  | 1.556279  | H | 1.509805  | 1.444716  | 7.245846  |
| H                                  | -2.811306 | 4.436069  | 1.962290  | C | 0.906775  | -1.351760 | 6.151997  |
| C                                  | -5.176972 | 3.126253  | 1.401877  | H | -0.220096 | 1.212209  | 5.395164  |
| O                                  | -5.686543 | 4.251455  | 1.966741  | C | 0.814707  | 0.622989  | 7.378075  |
| C                                  | -4.808896 | 5.353601  | 1.790369  | O | -0.302179 | -0.793254 | 5.836277  |
| H                                  | -4.520584 | 5.833437  | 2.742847  | O | -1.902140 | 2.394972  | 2.034409  |
| H                                  | -3.051448 | 5.213505  | 0.332333  | K | -4.421713 | -0.185836 | 2.569647  |
| C                                  | -3.527456 | 4.700378  | 1.194663  | C | -4.349447 | 0.338832  | -2.409693 |
| H                                  | -2.743379 | 3.799156  | 4.747940  | H | -3.818594 | -0.588709 | -2.094274 |
| O                                  | -3.674654 | 1.632029  | 6.494279  | H | -5.245714 | 0.448634  | -1.785691 |

|          |           |           |           |          |           |           |           |
|----------|-----------|-----------|-----------|----------|-----------|-----------|-----------|
| O        | -2.204461 | 2.740707  | -3.701156 | O        | -1.159327 | 0.799267  | 6.459270  |
| H        | -4.643493 | -0.540423 | -4.452134 | H        | 0.706381  | 4.655820  | 5.735703  |
| H        | -5.782745 | 0.831141  | -3.995465 | C        | -0.444211 | 1.689907  | 5.974651  |
| O        | -3.745817 | 1.324582  | -4.504799 | H        | 2.320630  | 2.781970  | 5.564920  |
| C        | -4.763342 | 0.427481  | -3.898225 | C        | 0.366248  | 3.710443  | 5.176330  |
| C        | -3.024358 | 1.915284  | -3.547334 | O        | 0.818927  | 1.360140  | 5.370342  |
| O        | -3.430207 | 1.474997  | -2.292946 | H        | 0.392346  | 1.668753  | -0.276549 |
| <b>B</b> |           |           |           | O        | -0.194775 | -3.088330 | 3.269462  |
| V        | -1.084310 | 1.765762  | 1.714720  | H        | -1.362880 | -1.422884 | 3.578434  |
| O        | 4.156055  | -0.025092 | 2.496400  | H        | -0.806013 | -1.477152 | 5.882115  |
| O        | 0.990775  | 1.027908  | -1.009210 | C        | -0.667308 | -2.434998 | 5.474792  |
| O        | -2.656509 | 1.274169  | 1.219941  | O        | 2.040183  | -3.244952 | 3.437104  |
| O        | 5.540850  | -1.072825 | 3.957809  | H        | -2.142261 | -3.013241 | 3.806209  |
| C        | 5.292459  | -2.062398 | 4.952302  | C        | 0.962900  | -3.016924 | 3.921499  |
| C        | 4.032053  | -1.495470 | 5.614654  | H        | -1.121793 | -3.188727 | 6.185865  |
| O        | 3.502826  | -0.467972 | 4.672840  | C        | -1.224819 | -2.419283 | 4.051015  |
| C        | 4.367592  | -0.480205 | 3.588743  | O        | 0.755678  | -2.635504 | 5.209148  |
| H        | 5.140307  | -3.044889 | 4.405833  | O        | -1.260980 | 3.108618  | 2.762728  |
| H        | 4.255466  | -0.952501 | 6.547672  | K        | -4.328981 | 2.386528  | 2.919505  |
| H        | 6.217719  | -2.088739 | 5.547428  | C        | -4.544818 | -2.334779 | 0.846849  |
| H        | 3.268702  | -2.245322 | 5.737542  | H        | -4.978947 | -2.791326 | 1.744267  |
| C        | -0.311983 | 1.454483  | -3.060446 | H        | -3.649143 | -2.843132 | 0.506269  |
| C        | 0.110831  | 0.467690  | -1.889219 | O        | -6.042116 | -1.381517 | -2.140812 |
| H        | 0.073535  | 2.386710  | -2.738849 | H        | -5.099174 | -0.255539 | 1.345710  |
| H        | 0.298093  | 1.217970  | -3.974399 | H        | -3.329800 | -0.370531 | 1.068839  |
| H        | -0.801169 | 0.283507  | -1.334490 | O        | -4.779082 | -0.511678 | -0.523599 |
| H        | 0.489065  | -0.468822 | -2.282999 | C        | -4.319449 | -0.823262 | 0.866406  |
| C        | -2.220561 | 1.024970  | -4.473234 | C        | -5.470088 | -1.552758 | -1.065570 |
| O        | -1.735271 | 1.520360  | -3.184306 | O        | -5.485829 | -2.583214 | -0.224287 |
| H        | -2.002602 | 1.738400  | -5.382734 | <b>C</b> |           |           |           |
| H        | -3.323237 | 1.090011  | -4.428833 | V        | -1.618855 | 1.347245  | 1.947674  |
| H        | -1.870841 | -0.019837 | -4.692616 | O        | 3.742468  | 1.710216  | 3.117313  |
| H        | -2.724248 | 7.222881  | 2.261124  | O        | 0.704028  | 0.807816  | -1.074193 |
| O        | -2.890999 | 5.345401  | 0.093287  | O        | -2.042735 | 0.272824  | 3.146894  |
| O        | -4.695804 | 4.214658  | 0.601003  | O        | 3.003917  | 0.775497  | 5.124514  |
| H        | -1.160743 | 4.745796  | 1.384444  | C        | 2.629253  | -0.557010 | 5.562733  |
| C        | -3.754919 | 4.973366  | 0.939177  | C        | 2.968234  | -1.490725 | 4.387168  |
| O        | -3.533957 | 5.333124  | 2.285896  | O        | 3.068062  | -0.435742 | 3.268674  |
| C        | -2.332187 | 6.157440  | 2.383367  | C        | 3.325144  | 0.766751  | 3.821599  |
| H        | -2.165309 | 5.946495  | 3.483288  | H        | 3.186232  | -0.762603 | 6.506613  |
| H        | -1.018357 | 6.491855  | 0.539702  | H        | 2.144577  | -2.250158 | 4.213452  |
| C        | -1.371197 | 5.784154  | 1.400865  | H        | 1.552412  | -0.613117 | 5.764768  |
| H        | -4.447934 | -0.610499 | 8.217469  | H        | 3.932512  | -1.938537 | 4.411020  |
| O        | -5.022827 | 0.513407  | 5.386078  | C        | -0.734859 | 0.284770  | -3.156298 |
| O        | -4.798346 | -1.438159 | 4.202615  | C        | 0.688793  | 0.382464  | -2.394409 |
| H        | -3.930661 | 1.786793  | 6.649188  | H        | -1.100759 | 1.274098  | -3.372932 |
| C        | -4.656645 | -0.829611 | 5.220605  | H        | -0.603429 | -0.218685 | -4.071277 |
| O        | -4.073347 | -1.286988 | 6.378252  | H        | 1.155359  | -0.652808 | -2.561561 |
| C        | -3.972698 | -0.216672 | 7.336689  | H        | 1.297893  | 1.106708  | -2.913557 |
| H        | -2.920243 | 0.060422  | 7.496824  | C        | -1.436649 | -1.668968 | -1.866233 |
| H        | -5.576009 | 1.291860  | 7.251737  | O        | -1.706140 | -0.356727 | -2.336656 |
| C        | -4.686508 | 0.984999  | 6.702556  | H        | -2.441745 | -2.155586 | -1.888376 |
| O        | -0.332955 | 2.493548  | 0.362893  | H        | -1.174535 | -1.570668 | -0.786442 |
| K        | 1.681215  | -0.676054 | 1.154830  | H        | -0.617040 | -2.209713 | -2.465161 |
| O        | -0.143152 | 0.365846  | 2.129381  | H        | -2.455574 | 7.091899  | 0.978408  |
| K        | -3.142506 | 2.796295  | -0.944776 | O        | 0.020791  | 6.912044  | 0.760406  |
| O        | -0.740607 | 3.023792  | 5.957885  | O        | 0.442772  | 6.403639  | -1.337893 |
| H        | -0.126964 | 3.986789  | 4.171230  | H        | -1.173375 | 4.552683  | 1.410758  |
| H        | 1.738272  | 2.607541  | 3.945343  | C        | -0.360787 | 6.482553  | -0.431512 |
| C        | 1.434809  | 2.599840  | 4.981043  | O        | -1.662980 | 6.171697  | -0.866995 |

|          |           |           |           |   |           |           |           |
|----------|-----------|-----------|-----------|---|-----------|-----------|-----------|
| C        | -2.504368 | 6.105745  | 0.444322  | C | 2.807183  | -1.940685 | -0.513675 |
| H        | -3.540739 | 5.681595  | 0.172131  | H | 2.467039  | -4.042226 | 1.686749  |
| H        | -2.175661 | 5.566040  | 2.628275  | H | 0.067570  | -2.637386 | 0.540074  |
| C        | -1.880169 | 5.373893  | 1.623769  | H | 1.705003  | -2.431442 | 2.273224  |
| H        | -2.611428 | -1.016127 | 6.065166  | H | 0.832336  | -4.224254 | -0.126770 |
| O        | -1.300254 | -1.046767 | 8.859806  | C | -1.204780 | 1.266464  | -2.761368 |
| O        | 0.389076  | 0.464067  | 8.404168  | C | -0.057432 | 0.579835  | -2.114753 |
| H        | -1.838410 | -3.053873 | 8.349729  | H | -1.166842 | 2.308023  | -2.371405 |
| C        | -0.411897 | -0.385502 | 8.057047  | H | -1.219074 | 1.331750  | -3.916071 |
| O        | -0.691710 | -0.720830 | 6.773525  | H | -0.178632 | -0.533920 | -2.146391 |
| C        | -1.832861 | -1.581926 | 6.585732  | H | 0.830926  | 0.829478  | -2.670009 |
| H        | -1.415070 | -2.505660 | 6.053436  | C | -3.517767 | 0.860731  | -3.316971 |
| H        | -3.191031 | -1.829451 | 8.346544  | O | -2.534661 | 0.697720  | -2.309050 |
| C        | -2.134220 | -1.984176 | 8.095573  | H | -4.499599 | 0.369102  | -2.988481 |
| O        | -1.067712 | 0.249501  | 0.650491  | H | -3.047968 | 0.423393  | -4.348423 |
| K        | 1.479613  | 2.359154  | 0.916133  | H | -3.650492 | 1.950460  | -3.468956 |
| O        | -0.208570 | 2.166150  | 2.590112  | H | -0.066743 | 3.049681  | 1.287707  |
| K        | -2.684815 | 2.115982  | -1.077043 | O | -2.829700 | 2.860884  | 0.382338  |
| O        | -3.978394 | 2.695207  | 4.839849  | O | -2.713405 | 4.278048  | -1.294636 |
| H        | -4.987822 | 4.418068  | 4.086460  | H | -2.769981 | 3.241237  | 2.757979  |
| H        | -6.221941 | 3.035504  | 2.561995  | C | -2.419897 | 3.826294  | -0.231703 |
| C        | -5.294806 | 2.555650  | 2.850743  | O | -1.226284 | 4.572526  | 0.482554  |
| O        | -4.373105 | 0.530379  | 5.550168  | C | -0.751227 | 3.859503  | 1.626954  |
| H        | -3.540684 | 3.768781  | 3.067970  | H | -0.185906 | 4.560924  | 2.235924  |
| C        | -4.581819 | 1.406278  | 4.747282  | H | -1.084722 | 3.049993  | 3.474854  |
| H        | -4.690566 | 2.378187  | 1.936827  | C | -1.694957 | 3.072951  | 2.548358  |
| C        | -4.469250 | 3.536773  | 3.660536  | H | -7.237003 | 1.218438  | 4.120378  |
| O        | -5.532351 | 1.358974  | 3.702571  | O | -4.998696 | 0.776556  | 5.746757  |
| H        | -0.212985 | 0.424066  | -0.402316 | O | -5.109926 | -1.478902 | 6.142713  |
| O        | 0.131780  | -4.415346 | 2.165052  | H | -6.079098 | 2.256305  | 6.763343  |
| H        | 0.262626  | -2.780915 | 0.798343  | C | -5.678984 | -0.410366 | 5.910842  |
| H        | -0.013211 | -1.279878 | 2.837986  | O | -7.025339 | -0.219934 | 5.757252  |
| C        | -0.575952 | -2.229410 | 2.802731  | C | -7.192661 | 1.157186  | 5.228382  |
| O        | 0.594575  | -5.187753 | 4.250041  | H | -8.121235 | 1.613658  | 5.616893  |
| H        | -1.426851 | -3.385800 | 1.182720  | H | -5.553100 | 2.586723  | 5.058911  |
| C        | 0.164021  | -4.333623 | 3.503156  | C | -5.961574 | 1.835963  | 5.731940  |
| H        | -1.621251 | -1.977553 | 3.006355  | O | 0.197419  | -0.447721 | 1.151064  |
| C        | -0.444754 | -3.204228 | 1.581612  | K | 2.934785  | 0.733555  | 1.108305  |
| O        | -0.211190 | -3.112624 | 3.971802  | O | 1.197260  | 1.039115  | 3.236424  |
| O        | -2.595473 | 2.686128  | 1.411244  | K | -2.753880 | 0.301810  | 0.412520  |
| K        | -1.137297 | 1.559493  | 5.132133  | O | -0.858399 | 3.396718  | 6.038604  |
| C        | -5.516283 | -1.518302 | 1.317537  | H | 0.362816  | 1.938661  | 5.110643  |
| H        | -6.173435 | -0.903032 | 1.974988  | H | -0.489025 | 0.208933  | 6.323746  |
| H        | -5.227247 | -2.417605 | 1.852759  | C | -0.759838 | 1.134178  | 6.781792  |
| O        | -6.200862 | -0.804244 | -1.986825 | O | -3.101188 | 3.538479  | 5.604777  |
| H        | -4.146795 | 0.148164  | 1.599666  | H | 0.890543  | 2.671115  | 6.757808  |
| H        | -3.263387 | -1.182113 | 0.942307  | C | -2.128621 | 2.918676  | 5.998900  |
| O        | -4.639570 | -0.200904 | -0.386715 | H | -0.770750 | 1.248164  | 7.875158  |
| C        | -4.245881 | -0.702337 | 0.921467  | C | 0.106248  | 2.234309  | 6.148792  |
| C        | -5.722317 | -0.884025 | -0.859205 | O | -2.145313 | 1.579981  | 6.264510  |
| O        | -6.193673 | -1.768277 | 0.086804  | H | 0.090506  | 0.385463  | 0.012675  |
| <b>D</b> |           |           |           | O | 3.612132  | 1.000686  | 5.789410  |
| V        | -0.075179 | 0.053453  | 2.779708  | H | 3.689709  | -0.376087 | 7.353384  |
| O        | 3.512646  | -1.389146 | -1.348743 | H | 2.780369  | -2.123703 | 5.945926  |
| O        | 0.087404  | 1.095196  | -0.791920 | C | 2.616001  | -1.111320 | 5.635314  |
| O        | -0.227011 | -1.257843 | 3.847645  | O | 4.421908  | 0.997451  | 3.650312  |
| O        | 3.206409  | -2.382933 | 0.677112  | H | 2.182595  | 0.408289  | 7.169498  |
| C        | 2.044642  | -3.054145 | 1.386111  | C | 3.922123  | 0.432091  | 4.606228  |
| C        | 0.994704  | -3.178851 | 0.249691  | H | 1.592719  | -0.967325 | 5.231601  |
| O        | 1.485526  | -2.258286 | -0.761234 | C | 3.009370  | -0.050622 | 6.610257  |

|          |           |           |           |                                      |           |           |           |
|----------|-----------|-----------|-----------|--------------------------------------|-----------|-----------|-----------|
| O        | 3.589513  | -0.888209 | 4.559131  | O                                    | 1.102198  | 1.152138  | 3.148312  |
| O        | -1.739565 | 0.817824  | 2.601073  | K                                    | -2.941960 | 0.268532  | 0.390504  |
| K        | -2.518722 | -0.645384 | 4.572748  | O                                    | -0.879154 | 3.287309  | 6.049772  |
| C        | -5.837944 | 3.202708  | -0.508305 | H                                    | 0.643896  | 2.029985  | 5.267565  |
| H        | -5.422475 | 4.023311  | 0.000457  | H                                    | -0.680123 | 0.103939  | 6.223451  |
| H        | -5.343354 | 3.169867  | -1.534176 | C                                    | -0.794227 | 1.044564  | 6.707744  |
| O        | -6.502684 | 0.227708  | 1.203260  | O                                    | -3.124671 | 3.468893  | 5.934672  |
| H        | -7.685524 | 3.936270  | 0.168101  | H                                    | 0.849836  | 2.458326  | 6.946023  |
| H        | -7.681838 | 3.237072  | -1.513407 | C                                    | -2.153555 | 2.836922  | 6.162927  |
| O        | -7.604205 | 1.803327  | 0.097946  | H                                    | -0.737392 | 0.842686  | 7.773885  |
| C        | -7.346130 | 3.071292  | -0.486571 | C                                    | 0.085319  | 2.209137  | 6.213769  |
| C        | -6.486151 | 1.247470  | 0.532015  | O                                    | -2.234662 | 1.468600  | 6.355862  |
| O        | -5.397990 | 1.990876  | 0.190167  | H                                    | 0.035441  | 0.256066  | -0.113239 |
| <b>E</b> |           |           |           | O                                    | 3.795893  | 0.987208  | 5.835894  |
| V        | -0.108632 | 0.143394  | 2.687635  | H                                    | 3.654609  | -0.309490 | 7.340130  |
| O        | 3.492373  | -1.374320 | -1.429582 | H                                    | 2.915307  | -2.052419 | 5.944731  |
| O        | -0.061238 | 1.123090  | -0.713134 | C                                    | 2.668520  | -1.036115 | 5.611527  |
| O        | -0.359062 | -1.046419 | 3.870488  | O                                    | 4.560826  | 1.184241  | 3.708477  |
| O        | 3.266942  | -2.412153 | 0.538274  | H                                    | 2.114043  | 0.588152  | 7.040207  |
| C        | 2.084111  | -2.913595 | 1.371927  | C                                    | 3.988655  | 0.541879  | 4.568776  |
| C        | 1.026043  | -3.155888 | 0.260951  | H                                    | 1.617090  | -1.007191 | 5.325458  |
| O        | 1.426334  | -2.174799 | -0.757281 | C                                    | 3.027161  | 0.045923  | 6.620791  |
| C        | 2.759923  | -1.955683 | -0.647127 | O                                    | 3.437402  | -0.683106 | 4.390440  |
| H        | 2.512021  | -3.781139 | 1.866930  | O                                    | -1.456303 | 1.373975  | 2.573196  |
| H        | 0.003524  | -2.781803 | 0.646674  | K                                    | -2.601799 | -0.625593 | 4.500542  |
| H        | 1.743881  | -2.117965 | 2.137502  | C                                    | -5.895742 | 3.095154  | -0.616549 |
| H        | 0.967645  | -4.208002 | -0.099938 | H                                    | -5.484946 | 4.034631  | -0.205448 |
| C        | -1.277209 | 1.108770  | -2.953507 | H                                    | -5.531356 | 2.984255  | -1.663216 |
| C        | -0.107785 | 0.679437  | -2.060256 | O                                    | -6.255146 | 0.339066  | 1.271624  |
| H        | -1.320486 | 2.201392  | -2.926679 | H                                    | -7.777924 | 4.022720  | 0.080458  |
| H        | -1.115237 | 0.711942  | -4.026979 | H                                    | -7.978662 | 2.998175  | -1.410032 |
| H        | -0.081433 | -0.426586 | -2.010084 | O                                    | -7.665191 | 1.994131  | 0.375120  |
| H        | 0.827414  | 0.957513  | -2.533538 | C                                    | -7.381039 | 3.128594  | -0.483829 |
| C        | -3.587868 | 0.724788  | -3.244602 | C                                    | -6.471852 | 1.350581  | 0.627335  |
| O        | -2.503368 | 0.595036  | -2.328562 | O                                    | -5.446065 | 1.995054  | 0.126806  |
| H        | -4.583406 | 0.592362  | -2.790409 |                                      |           |           |           |
| H        | -3.611214 | -0.034908 | -4.178864 | <b>Na<sub>2</sub>SnO<sub>3</sub></b> |           |           |           |
| H        | -3.583906 | 1.814897  | -3.647659 | <b>A</b>                             |           |           |           |
| H        | 0.284046  | 2.993214  | 1.301181  | Sn                                   | -0.997656 | -0.190095 | 4.615793  |
| O        | -2.917180 | 2.846022  | 0.686638  | O                                    | -2.840838 | 1.736699  | -0.525421 |
| O        | -2.512929 | 4.136024  | -1.333401 | O                                    | -0.799294 | 2.015146  | 2.034753  |
| H        | -2.396739 | 3.152467  | 3.051710  | O                                    | -1.837218 | -1.875309 | 4.374974  |
| C        | -2.289118 | 3.741599  | -0.144878 | O                                    | -1.114907 | 0.249961  | -0.530465 |
| O        | -1.193268 | 4.260349  | 0.542277  | C                                    | -0.697524 | -0.822515 | 0.378047  |
| C        | -0.587533 | 3.544947  | 1.628734  | C                                    | -2.016818 | -1.281794 | 0.990827  |
| H        | -0.187300 | 4.353836  | 2.252670  | O                                    | -2.853981 | -0.075299 | 0.857469  |
| H        | -0.618290 | 3.037864  | 3.542974  | C                                    | -2.299827 | 0.733800  | -0.098238 |
| C        | -1.337454 | 2.856831  | 2.701957  | H                                    | -0.193052 | -1.599899 | -0.207404 |
| H        | -7.236470 | 0.759604  | 3.958530  | H                                    | -1.958103 | -1.551813 | 2.057118  |
| O        | -5.023217 | 0.824832  | 5.531006  | H                                    | -0.012913 | -0.382243 | 1.116014  |
| O        | -5.039576 | -1.366529 | 6.295327  | H                                    | -2.501624 | -2.089245 | 0.427818  |
| H        | -6.083696 | 2.303408  | 6.381224  | C                                    | 0.571689  | 3.465648  | 0.713192  |
| C        | -5.607680 | -0.359668 | 5.896131  | C                                    | -0.726499 | 3.336082  | 1.492556  |
| O        | -6.989756 | -0.399173 | 5.706993  | H                                    | 0.623436  | 2.671166  | -0.054324 |
| C        | -7.252698 | 0.905091  | 5.088167  | H                                    | 0.624367  | 4.448225  | 0.207488  |
| H        | -8.251022 | 1.285391  | 5.498656  | H                                    | -0.765551 | 4.098048  | 2.290457  |
| H        | -5.895153 | 2.520413  | 4.612010  | H                                    | -1.568054 | 3.529672  | 0.800537  |
| C        | -6.084498 | 1.783466  | 5.438968  | C                                    | 2.943942  | 3.288535  | 0.960606  |
| O        | 0.216030  | -0.730544 | 1.246269  | O                                    | 1.676382  | 3.324704  | 1.630235  |
| K        | 3.008436  | 0.726122  | 1.157308  | H                                    | 2.970352  | 2.481443  | 0.206930  |
|          |           |           |           | H                                    | 3.707693  | 3.081897  | 1.723798  |

|          |           |           |           |    |           |           |           |
|----------|-----------|-----------|-----------|----|-----------|-----------|-----------|
| H        | 3.157093  | 4.251343  | 0.463896  | O  | -0.830948 | -2.156364 | 6.176130  |
| H        | -3.319923 | 5.459235  | 5.348226  | O  | -2.045567 | 1.175404  | -2.526628 |
| O        | -1.550305 | 3.402458  | 6.542073  | C  | -1.379843 | 0.852277  | -1.290292 |
| O        | 0.334309  | 3.707168  | 5.300324  | C  | -2.470564 | 0.911148  | -0.307813 |
| H        | -3.280137 | 2.442343  | 5.947865  | O  | -3.532249 | 1.535802  | -0.999296 |
| C        | -0.868725 | 3.830418  | 5.451962  | C  | -3.268614 | 1.589299  | -2.405831 |
| O        | -1.675363 | 4.467078  | 4.565259  | H  | -1.052299 | -0.211903 | -1.417364 |
| C        | -3.046652 | 4.435278  | 5.054817  | H  | -2.327380 | 1.567977  | 0.641827  |
| H        | -3.688650 | 4.082709  | 4.235421  | H  | -0.612435 | 1.629191  | -1.307200 |
| H        | -3.498358 | 3.805528  | 7.138739  | H  | -2.715908 | -0.138241 | -0.003777 |
| C        | -2.974914 | 3.457542  | 6.239159  | C  | -0.604180 | 4.299604  | 2.177484  |
| H        | -4.603942 | -4.761539 | 2.743147  | C  | -1.632418 | 3.468551  | 2.921124  |
| O        | -4.716910 | -2.759108 | 4.904645  | H  | -0.423980 | 3.876318  | 1.144599  |
| O        | -5.132870 | -0.869963 | 3.706231  | H  | -0.886648 | 5.384982  | 2.325248  |
| H        | -2.877321 | -3.689219 | 5.059027  | H  | -1.657820 | 3.693711  | 4.040011  |
| C        | -4.720360 | -2.018893 | 3.776691  | H  | -2.591813 | 3.864588  | 2.569428  |
| O        | -4.270974 | -2.714195 | 2.702872  | C  | 1.796783  | 4.677580  | 1.863800  |
| C        | -3.865420 | -4.048403 | 3.136684  | O  | 0.819423  | 4.194274  | 2.807359  |
| H        | -2.867071 | -4.250528 | 2.722383  | H  | 2.763451  | 4.366776  | 2.135281  |
| H        | -4.340096 | -4.784618 | 5.179185  | H  | 1.587369  | 5.723160  | 1.685781  |
| C        | -3.876514 | -3.932062 | 4.667632  | H  | 1.546582  | 4.233164  | 0.904280  |
| O        | -2.005542 | 1.438332  | 4.165222  | H  | -2.618140 | 2.993932  | 8.354385  |
| O        | 0.877708  | 0.147816  | 4.829886  | O  | -0.253119 | 1.219776  | 7.185070  |
| Na       | 1.078514  | 2.109520  | 3.609388  | O  | 0.729807  | 2.892924  | 5.947556  |
| O        | 4.082624  | 0.065898  | 5.393698  | H  | -2.141673 | 0.172068  | 7.629723  |
| H        | 2.324955  | -0.151676 | 6.471128  | C  | -0.196062 | 2.438066  | 6.571387  |
| H        | 1.996862  | 2.211695  | 6.617880  | O  | -1.344146 | 3.068170  | 6.684545  |
| C        | 3.029305  | 1.910881  | 6.394172  | C  | -2.369848 | 2.413222  | 7.447262  |
| O        | 4.258968  | 0.951629  | 3.293001  | H  | -3.187184 | 2.162396  | 6.830238  |
| H        | 3.843765  | 0.140336  | 7.457538  | H  | -1.303403 | 1.164833  | 8.958961  |
| C        | 3.902319  | 1.022767  | 4.447712  | C  | -1.665116 | 1.143688  | 7.882583  |
| H        | 3.749471  | 2.539040  | 6.938322  | H  | -4.143528 | -4.198241 | 5.033149  |
| C        | 3.270391  | 0.405804  | 6.560451  | O  | -4.732247 | -1.140284 | 6.338336  |
| O        | 3.252739  | 2.119108  | 4.967099  | O  | -5.387079 | -0.235728 | 4.328378  |
| H        | -1.370004 | 1.932747  | 2.921193  | H  | -2.786117 | -2.290931 | 6.914510  |
| O        | 0.823850  | -2.672835 | 2.446947  | C  | -4.876519 | -1.099130 | 5.064227  |
| H        | 2.634808  | -3.083433 | 3.385027  | O  | -4.588281 | -2.360216 | 4.451433  |
| H        | 1.479259  | -4.386134 | 5.113468  | C  | -3.702456 | -3.208778 | 5.243795  |
| C        | 0.850915  | -3.681436 | 4.554118  | H  | -2.602667 | -3.207297 | 4.872927  |
| O        | -0.797898 | -3.985065 | 1.536312  | H  | -4.431659 | -3.323586 | 7.350917  |
| H        | 1.678496  | -1.687387 | 4.076575  | C  | -3.751123 | -2.757179 | 6.683011  |
| C        | -0.044672 | -3.721027 | 2.454210  | O  | -1.967966 | 0.456793  | 4.510339  |
| H        | 0.141655  | -3.152351 | 5.209036  | O  | 1.304260  | 0.063912  | 4.547501  |
| C        | 1.638149  | -2.713481 | 3.663769  | Na | 1.077425  | 2.110302  | 3.609132  |
| O        | 0.053672  | -4.447498 | 3.599925  | O  | 4.978035  | 0.214553  | 3.951650  |
| Na       | -3.797380 | 0.890498  | 2.953056  | H  | 3.502681  | -0.844527 | 4.942248  |
| C        | -5.634284 | 2.853678  | -1.030457 | H  | 2.741146  | 1.121888  | 6.052645  |
| H        | -5.205389 | 2.045838  | -1.637695 | C  | 3.909715  | 1.109707  | 5.863764  |
| H        | -6.663092 | 3.077359  | -1.343829 | O  | 4.907822  | 2.151314  | 2.731746  |
| O        | -4.723769 | 2.993712  | 2.311063  | H  | 5.065022  | -0.820492 | 5.877743  |
| H        | -3.761194 | 3.931374  | -1.485688 | C  | 4.622269  | 1.512107  | 3.709824  |
| H        | -5.200149 | 5.017835  | -1.324646 | H  | 4.647867  | 1.354488  | 6.635976  |
| O        | -4.432473 | 4.257067  | 0.445497  | C  | 4.382990  | -0.232152 | 5.168356  |
| C        | -4.718147 | 4.096016  | -0.972878 | O  | 3.964770  | 2.036285  | 4.719236  |
| C        | -4.923355 | 3.195355  | 1.123794  | H  | -1.614621 | 1.226156  | 3.915768  |
| O        | -5.682389 | 2.389951  | 0.346945  | O  | 1.331386  | -0.716502 | 0.530464  |
| <b>B</b> |           |           |           | H  | 3.294708  | -1.522765 | 0.202996  |
| Sn       | -0.417199 | -0.626228 | 5.153133  | H  | 3.090027  | -2.632072 | 2.433187  |
| O        | -4.018960 | 1.921972  | -3.287308 | C  | 2.397481  | -1.810332 | 2.244694  |
| O        | -1.471393 | 2.115131  | 2.686327  | O  | -0.587257 | -2.072685 | 0.374425  |



|          |           |           |           |          |           |           |           |
|----------|-----------|-----------|-----------|----------|-----------|-----------|-----------|
| H        | 3.230322  | -0.017120 | 1.051643  | C        | -2.056977 | -3.059578 | 6.909654  |
| C        | 0.518590  | -1.875888 | 0.893854  | O        | -1.667361 | 0.165598  | 2.965044  |
| H        | 2.055985  | -1.200503 | 3.109058  | O        | 0.799307  | 0.310055  | 5.161025  |
| C        | 2.697072  | -0.974429 | 0.959836  | Na       | 1.080952  | 2.106589  | 3.613007  |
| O        | 1.229531  | -2.587213 | 1.781036  | O        | 4.003748  | -0.289657 | 4.753146  |
| Na       | -3.796969 | 0.890894  | 2.946467  | H        | 2.591742  | -1.215939 | 5.867895  |
| C        | -6.839136 | 0.528593  | -1.289062 | H        | 2.846154  | 0.562180  | 7.659192  |
| H        | -6.168182 | 1.163174  | -1.907261 | C        | 3.638053  | 0.503831  | 6.949515  |
| H        | -7.040638 | -0.473629 | -1.863905 | O        | 3.646502  | 1.721571  | 3.764710  |
| O        | -5.884065 | 1.551768  | 1.801174  | H        | 4.286716  | -1.535262 | 6.409989  |
| H        | -8.288932 | 2.093453  | -1.636213 | C        | 3.660582  | 1.041549  | 4.742568  |
| H        | -8.954212 | 0.874056  | -0.522609 | H        | 4.592635  | 0.747809  | 7.473207  |
| O        | -7.481212 | 2.050799  | 0.255905  | C        | 3.549385  | -0.763359 | 6.107296  |
| C        | -7.984873 | 1.353311  | -0.858138 | O        | 3.413528  | 1.550019  | 5.970363  |
| C        | -6.458722 | 1.264438  | 0.774670  | H        | -0.764770 | 1.218905  | 1.747487  |
| O        | -6.135771 | 0.255968  | -0.022148 | O        | -4.109588 | -3.196123 | 1.648036  |
| <b>C</b> |           |           |           | H        | -2.831058 | -2.355893 | 2.971184  |
| Sn       | -0.698036 | -0.641730 | 4.300440  | H        | -1.008855 | -3.566926 | 2.296127  |
| O        | -3.484244 | 3.288051  | -1.421981 | C        | -1.941240 | -4.030118 | 1.915364  |
| O        | 0.005572  | 1.814811  | 1.500887  | O        | -3.970176 | -2.893756 | -0.682197 |
| O        | -0.589336 | -2.612043 | 4.335765  | H        | -3.433560 | -4.040626 | 3.389636  |
| O        | -2.903699 | 1.185434  | -2.170416 | C        | -3.492126 | -3.249457 | 0.387806  |
| C        | -2.763178 | -0.212994 | -1.552997 | H        | -1.940202 | -5.124373 | 1.892831  |
| C        | -3.584084 | -0.028940 | -0.238305 | C        | -3.095314 | -3.372813 | 2.643934  |
| O        | -3.611463 | 1.465897  | -0.043011 | O        | -2.153965 | -3.495541 | 0.535026  |
| C        | -3.383871 | 2.128308  | -1.200127 | Na       | -3.797378 | 0.889180  | 2.953202  |
| H        | -3.079980 | -0.893740 | -2.305699 | C        | -2.301965 | 3.944323  | 1.724635  |
| H        | -3.021747 | -0.473108 | 0.592792  | H        | -1.649176 | 4.337221  | 2.559946  |
| H        | -1.714459 | -0.485253 | -1.230361 | H        | -1.725373 | 3.316888  | 1.036927  |
| H        | -4.585818 | -0.301183 | -0.261494 | O        | -5.477869 | 3.219110  | 3.151698  |
| C        | 1.181301  | 0.188025  | -0.030878 | H        | -2.848446 | 6.037817  | 1.506150  |
| C        | 0.343861  | 1.509818  | 0.090847  | H        | -3.360685 | 5.178260  | 0.138800  |
| H        | 0.475351  | -0.676290 | 0.239617  | O        | -4.561487 | 4.837487  | 1.859227  |
| H        | 1.508152  | 0.205430  | -1.075767 | C        | -3.252687 | 5.074613  | 1.213867  |
| H        | 1.071355  | 2.314169  | -0.161342 | C        | -4.552864 | 3.694165  | 2.516789  |
| H        | -0.508311 | 1.565356  | -0.558020 | O        | -3.289899 | 3.087559  | 2.420345  |
| C        | 2.874247  | -1.042912 | 1.130380  | <b>D</b> |           |           |           |
| O        | 2.346030  | 0.258822  | 0.832953  | Sn       | -1.124948 | -0.214380 | 5.067285  |
| H        | 3.949921  | -0.954313 | 1.492268  | O        | -4.911665 | -1.121877 | 1.342814  |
| H        | 2.908698  | -1.740744 | 0.284656  | O        | 0.215398  | 0.519095  | 1.647669  |
| H        | 2.399675  | -1.494520 | 2.003690  | O        | -1.984335 | -1.174091 | 6.439838  |
| H        | -0.727692 | 4.943044  | 7.993631  | O        | -3.478228 | -2.903880 | 1.242416  |
| O        | -0.623604 | 3.718535  | 4.951295  | C        | -2.249284 | -3.182307 | 0.461371  |
| O        | 1.002303  | 5.025416  | 4.063737  | C        | -2.018146 | -1.917178 | -0.325395 |
| H        | -2.376659 | 3.614930  | 6.089832  | O        | -3.139403 | -1.070144 | -0.038699 |
| C        | 0.346493  | 4.698228  | 5.030952  | C        | -3.920208 | -1.699340 | 0.884107  |
| O        | 0.470675  | 5.183189  | 6.310386  | H        | -1.475534 | -3.329980 | 1.211895  |
| C        | -0.907514 | 4.917388  | 6.934456  | H        | -1.951716 | -2.114762 | -1.356355 |
| H        | -1.409062 | 5.783144  | 6.553054  | H        | -2.462036 | -4.073902 | -0.055317 |
| H        | -0.793763 | 2.731763  | 6.669068  | H        | -1.012480 | -1.541803 | -0.061899 |
| C        | -1.242808 | 3.670937  | 6.274055  | C        | 0.803644  | 2.675797  | 0.814592  |
| H        | -3.580489 | -3.321510 | 8.342991  | C        | 0.041001  | 1.387505  | 0.492768  |
| O        | -2.476739 | -0.839466 | 5.932306  | H        | 1.851265  | 2.406055  | 1.121883  |
| O        | -4.304682 | -0.820771 | 4.685905  | H        | 0.814234  | 3.358875  | -0.024639 |
| H        | -1.639651 | -3.778868 | 6.104094  | H        | -0.986726 | 1.590231  | 0.180549  |
| C        | -3.669190 | -1.297046 | 5.698173  | H        | 0.601138  | 0.864304  | -0.267451 |
| O        | -4.328964 | -2.083873 | 6.651164  | C        | -1.063312 | 3.916378  | 1.641949  |
| C        | -3.381301 | -3.184605 | 7.260438  | O        | 0.279303  | 3.443475  | 1.965939  |
| H        | -3.806415 | -4.075063 | 6.853402  | H        | -1.827155 | 3.046212  | 1.652499  |
| H        | -1.249625 | -2.767615 | 7.523134  | H        | -1.069936 | 4.352238  | 0.599129  |

|          |           |           |           |    |           |           |           |
|----------|-----------|-----------|-----------|----|-----------|-----------|-----------|
| H        | -1.391814 | 4.720098  | 2.344643  | O  | -1.117209 | -2.657208 | 3.942590  |
| H        | 0.150543  | 5.720973  | 7.819573  | O  | -2.435939 | 1.620110  | -1.577456 |
| O        | 0.644439  | 3.339622  | 6.244454  | C  | -0.993852 | 1.284249  | -1.616370 |
| O        | -1.296250 | 3.303250  | 5.114050  | C  | -0.976134 | -0.255955 | -1.251522 |
| H        | 0.685759  | 2.704660  | 8.222021  | O  | -2.331463 | -0.576043 | -0.923910 |
| C        | -0.647960 | 3.590903  | 6.099210  | C  | -3.147079 | 0.500180  | -1.067640 |
| O        | -1.203481 | 4.231824  | 7.199654  | H  | -0.401501 | 1.574966  | -2.556349 |
| C        | -0.075760 | 4.683585  | 8.037327  | H  | -0.343342 | -0.381602 | -0.379568 |
| H        | -0.434319 | 4.572073  | 9.077739  | H  | -0.491808 | 1.787293  | -0.737158 |
| H        | 1.962836  | 3.919642  | 7.741855  | H  | -0.642808 | -0.807665 | -2.143695 |
| C        | 0.947618  | 3.624409  | 7.727447  | C  | 0.166846  | 4.756716  | 2.388053  |
| H        | -4.952960 | 2.598457  | 8.908369  | C  | -0.901828 | 3.734122  | 2.217568  |
| O        | -3.703159 | 1.596856  | 6.155326  | H  | 0.536095  | 5.055243  | 1.373413  |
| O        | -5.300375 | 2.193346  | 4.642632  | H  | -0.224775 | 5.593894  | 2.960012  |
| H        | -3.228649 | 0.549469  | 7.736225  | H  | -1.465569 | 3.414791  | 3.154915  |
| C        | -4.901534 | 2.093622  | 5.803799  | H  | -1.640576 | 4.207128  | 1.506770  |
| O        | -5.609546 | 2.420782  | 6.911508  | C  | 2.181318  | 5.206645  | 3.426937  |
| C        | -4.999694 | 1.847728  | 8.073859  | O  | 1.188518  | 4.204774  | 3.181962  |
| H        | -5.575333 | 0.968627  | 8.403217  | H  | 3.162945  | 4.819366  | 3.635809  |
| H        | -2.849064 | 2.389963  | 7.882609  | H  | 1.955282  | 5.855401  | 4.278672  |
| C        | -3.537155 | 1.607407  | 7.602633  | H  | 2.287467  | 5.930039  | 2.556687  |
| O        | -1.699795 | 0.447507  | 3.330362  | H  | -5.263169 | 3.224984  | 6.423081  |
| O        | 0.697177  | 0.254015  | 5.236754  | O  | -2.228571 | 3.063641  | 7.450268  |
| Na       | 1.077302  | 2.107412  | 3.609945  | O  | -1.124544 | 3.977819  | 5.705025  |
| O        | 4.164458  | -0.913498 | 2.797472  | H  | -3.701557 | 1.974829  | 8.406169  |
| H        | 1.837406  | -1.124998 | 3.570658  | C  | -2.141351 | 3.591909  | 6.174070  |
| H        | 2.911573  | 0.380089  | 5.860253  | O  | -3.400353 | 3.554003  | 5.612182  |
| C        | 3.411222  | -0.166736 | 5.069983  | C  | -4.321923 | 2.764857  | 6.380841  |
| O        | 4.271635  | 1.146773  | 1.871530  | H  | -4.458366 | 1.735213  | 5.983542  |
| H        | 2.186764  | -1.912673 | 5.257509  | H  | -4.022220 | 3.849000  | 8.181197  |
| C        | 4.122505  | 0.328384  | 2.808606  | C  | -3.594576 | 2.894576  | 7.750074  |
| H        | 4.345340  | -0.598235 | 5.503561  | H  | -2.594527 | -4.022810 | 6.622430  |
| C        | 2.323580  | -1.144260 | 4.549315  | O  | -2.060849 | -0.616464 | 5.402589  |
| O        | 3.640552  | 0.915376  | 4.040998  | O  | -4.320784 | -0.525290 | 4.823611  |
| H        | -0.671130 | 0.566670  | 2.159365  | H  | -0.323562 | -3.819816 | 5.768501  |
| O        | 2.801465  | -1.755926 | -1.020914 | C  | -3.264387 | -1.078620 | 5.424003  |
| H        | 4.535643  | -2.654705 | -0.462511 | O  | -3.315479 | -2.157528 | 6.141583  |
| H        | 3.259998  | -4.191214 | 1.079059  | C  | -2.581126 | -3.337456 | 5.744504  |
| C        | 2.732243  | -3.320736 | 0.822525  | H  | -3.186213 | -3.829978 | 4.896731  |
| O        | 0.723671  | -2.213255 | -1.811097 | H  | -0.858728 | -2.081221 | 5.974432  |
| H        | 3.943794  | -1.395726 | 0.761600  | C  | -1.050580 | -2.952238 | 5.381228  |
| C        | 1.654689  | -2.414608 | -1.045774 | O  | -1.779685 | 0.492204  | 2.436325  |
| H        | 2.435506  | -2.808388 | 1.733081  | O  | 1.145651  | -0.097526 | 3.584898  |
| C        | 3.664989  | -2.191408 | 0.055548  | Na | 1.078238  | 2.107647  | 3.606140  |
| O        | 1.588783  | -3.419206 | -0.093350 | O  | 2.968164  | -0.794569 | 6.502181  |
| Na       | -3.796387 | 0.890945  | 2.952071  | H  | 1.141451  | -1.596140 | 5.997781  |
| C        | -7.217268 | 0.836521  | 0.769075  | H  | 0.150083  | 0.600458  | 5.982386  |
| H        | -7.276758 | -0.172396 | 1.275328  | C  | 1.076397  | 0.571711  | 6.602263  |
| H        | -8.164435 | 1.384553  | 1.018709  | O  | 4.360391  | 0.737349  | 5.501890  |
| O        | -4.172471 | 2.354673  | 1.008433  | H  | 1.432433  | -1.405792 | 7.749700  |
| H        | -6.581450 | -0.140321 | -1.150620 | C  | 3.264656  | 0.376715  | 5.912000  |
| H        | -7.377407 | 1.508466  | -1.419932 | H  | 0.820058  | 1.029963  | 7.649813  |
| O        | -5.488449 | 1.486508  | -0.687089 | C  | 1.609172  | -0.939759 | 6.775817  |
| C        | -6.812249 | 0.863159  | -0.763692 | O  | 2.171753  | 1.131482  | 5.886444  |
| C        | -5.202743 | 1.848593  | 0.599573  | H  | -0.904140 | 1.824860  | 1.977051  |
| O        | -6.204690 | 1.586862  | 1.448824  | O  | 2.392385  | -1.706228 | 0.505096  |
| <b>E</b> |           |           |           | H  | 3.953201  | -2.167480 | 1.761525  |
| Sn       | -0.682107 | -0.690834 | 3.484422  | H  | 3.160881  | -4.444103 | 1.929355  |
| O        | -4.309826 | 0.532116  | -0.807071 | C  | 2.415536  | -3.700449 | 1.584311  |
| O        | -0.394310 | 2.582359  | 1.526439  | O  | 1.471382  | -2.524896 | -1.492237 |

|                                    |           |           |           |          |           |           |           |
|------------------------------------|-----------|-----------|-----------|----------|-----------|-----------|-----------|
| H                                  | 2.367810  | -1.668691 | 2.545444  | H        | -5.304789 | -1.438232 | 1.886561  |
| C                                  | 1.947319  | -2.740850 | -0.389580 | C        | -4.363800 | -0.930626 | 2.071560  |
| H                                  | 1.415587  | -3.907169 | 2.047677  | O        | -0.507224 | 0.947644  | 0.203082  |
| C                                  | 2.844369  | -2.240176 | 1.731493  | K        | -0.444232 | -1.272040 | -0.930891 |
| O                                  | 2.143592  | -3.934049 | 0.144130  | O        | -0.485746 | -0.888142 | 1.841195  |
| Na                                 | -3.800023 | 0.891801  | 2.957032  | K        | -0.540806 | 3.382911  | 3.524571  |
| C                                  | -7.060128 | 1.777252  | 0.973900  | O        | -3.290227 | 4.382052  | 3.755989  |
| H                                  | -6.817774 | 1.010787  | 0.271128  | H        | -4.801035 | 3.137066  | 3.104126  |
| H                                  | -8.127798 | 1.804732  | 1.361618  | H        | -5.364514 | 3.334344  | 5.443733  |
| O                                  | -5.174746 | 3.274363  | 3.537104  | C        | -4.354701 | 2.951978  | 5.252179  |
| H                                  | -5.866628 | 3.302226  | -0.195794 | O        | -1.745332 | 5.132763  | 5.301274  |
| H                                  | -7.452956 | 3.769649  | -0.124437 | H        | -3.209845 | 2.275227  | 3.453561  |
| O                                  | -6.447057 | 3.891547  | 1.762070  | C        | -2.781230 | 4.563039  | 5.024843  |
| C                                  | -6.734229 | 3.181515  | 0.428306  | H        | -4.229743 | 1.923637  | 5.655831  |
| C                                  | -5.896943 | 3.010784  | 2.600808  | C        | -3.936187 | 3.052574  | 3.777971  |
| O                                  | -6.061841 | 1.730619  | 2.081267  | O        | -3.436190 | 3.812598  | 5.936771  |
| <b>K<sub>3</sub>PO<sub>4</sub></b> |           |           |           | H        | 0.341136  | 2.012944  | -0.950943 |
| <b>A</b>                           |           |           |           | O        | 2.963866  | -3.183118 | 1.747946  |
| P                                  | -0.522448 | 0.679323  | 1.745070  | H        | 1.081872  | -2.378145 | 2.396993  |
| O                                  | -0.820470 | 4.848807  | 0.024107  | H        | 1.817855  | -0.093808 | 1.885669  |
| O                                  | 0.568270  | 2.735455  | -1.535106 | C        | 2.539624  | -0.916030 | 1.828449  |
| O                                  | -1.707577 | 1.432773  | 2.406469  | O        | 3.075876  | -3.452840 | -0.505173 |
| O                                  | 0.775062  | 3.742380  | 1.428595  | H        | 2.454786  | -2.372719 | 3.555068  |
| C                                  | 2.128454  | 3.237410  | 0.852251  | C        | 2.983608  | -2.701910 | 0.458764  |
| C                                  | 2.599683  | 4.530731  | 0.241815  | H        | 3.544344  | -0.524516 | 2.196290  |
| O                                  | 1.407345  | 5.043255  | -0.366695 | C        | 2.167509  | -2.258091 | 2.522254  |
| C                                  | 0.334049  | 4.481548  | 0.311728  | O        | 2.791871  | -1.379931 | 0.396822  |
| H                                  | 2.667715  | 2.825508  | 1.689526  | O        | 0.711595  | 1.245853  | 2.500588  |
| H                                  | 3.404608  | 4.459736  | -0.526350 | K        | -2.444156 | 2.602962  | 0.233872  |
| H                                  | 1.986138  | 2.470230  | 0.053032  | C        | -2.551461 | -1.295507 | 7.249008  |
| H                                  | 2.980686  | 5.249986  | 0.962767  | H        | -2.894560 | -0.819572 | 8.177940  |
| C                                  | -0.331626 | 2.647246  | -3.942116 | H        | -1.467353 | -1.360028 | 7.086730  |
| C                                  | 0.813347  | 2.500809  | -2.902015 | O        | -3.987530 | -4.164765 | 5.929954  |
| H                                  | -0.604033 | 3.727269  | -3.968866 | H        | -3.960349 | -0.054903 | 6.034437  |
| H                                  | -0.091781 | 2.301255  | -4.989821 | H        | -2.419100 | -0.264988 | 5.251679  |
| H                                  | 1.364372  | 1.596990  | -3.162546 | O        | -3.619800 | -1.946771 | 5.253806  |
| H                                  | 1.650182  | 3.217170  | -3.206906 | C        | -3.132902 | -0.769019 | 5.881121  |
| C                                  | -1.887986 | 0.850821  | -4.016616 | C        | -3.574979 | -3.041680 | 6.121335  |
| O                                  | -1.482716 | 2.004797  | -3.321566 | O        | -2.938042 | -2.713073 | 7.273004  |
| H                                  | -1.285244 | -0.019176 | -3.740674 | <b>B</b> |           |           |           |
| H                                  | -1.885531 | 0.882282  | -5.114023 | P        | -0.505454 | 1.574841  | 2.999408  |
| H                                  | -2.953679 | 0.693604  | -3.705708 | O        | 3.102648  | -2.426528 | 3.044575  |
| H                                  | 2.352526  | 1.309090  | 3.941231  | O        | -0.597374 | -2.216510 | 1.783703  |
| O                                  | 0.070181  | -0.006383 | 5.558192  | O        | 0.472738  | 2.214291  | 2.056085  |
| O                                  | -1.037471 | 1.835538  | 6.311448  | O        | 2.776164  | -1.182320 | 4.875969  |
| H                                  | 1.892224  | -0.889096 | 6.057570  | C        | 3.014681  | 0.209471  | 5.288823  |
| C                                  | -0.041472 | 1.321585  | 5.810987  | C        | 3.202382  | 0.895198  | 3.967119  |
| O                                  | 1.079949  | 2.016532  | 5.395869  | O        | 3.737808  | -0.232441 | 3.065057  |
| C                                  | 2.143543  | 1.088007  | 5.007560  | C        | 3.177545  | -1.347503 | 3.599695  |
| H                                  | 2.950586  | 1.276466  | 5.725575  | H        | 2.148927  | 0.579848  | 5.811585  |
| H                                  | 1.350480  | -0.944758 | 4.368879  | H        | 3.882501  | 1.804089  | 3.955526  |
| C                                  | 1.499376  | -0.289413 | 5.247962  | H        | 3.819039  | 0.267497  | 6.021943  |
| H                                  | -3.359301 | -2.903919 | 2.392766  | H        | 2.200621  | 1.235318  | 3.579866  |
| O                                  | -4.078259 | -0.057014 | 0.952979  | C        | 1.276076  | -2.307243 | 0.225114  |
| O                                  | -2.981007 | -0.273706 | -1.019557 | C        | -0.188985 | -2.710257 | 0.559062  |
| H                                  | -4.358004 | -0.273358 | 2.967491  | H        | 2.011434  | -2.490772 | 1.042345  |
| C                                  | -3.284809 | -0.750943 | 0.069209  | H        | 1.617951  | -2.970992 | -0.659024 |
| O                                  | -2.847635 | -1.899998 | 0.578065  | H        | -0.762473 | -2.577573 | -0.342066 |
| C                                  | -3.155382 | -1.863524 | 2.076753  | H        | -0.136586 | -3.888759 | 0.754413  |
| H                                  | -2.165131 | -1.503920 | 2.429425  | C        | 2.360696  | 0.027118  | 0.042031  |

|   |           |           |           |   |           |           |           |
|---|-----------|-----------|-----------|---|-----------|-----------|-----------|
| O | 1.206835  | -0.921314 | -0.064975 | O | -1.032382 | 2.643388  | -3.546273 |
| H | 2.867520  | 0.276863  | -0.844007 | C |           |           |           |
| H | 3.156914  | -0.295158 | 0.728606  | P | -0.593185 | 1.595378  | 2.989324  |
| H | 1.867578  | 0.830377  | 0.563794  | O | 2.661099  | -2.639987 | 3.114022  |
| H | -4.944900 | 4.251713  | 0.515246  | O | -0.833207 | -2.140006 | 1.020747  |
| O | -2.957436 | 3.434266  | -0.563739 | O | 0.024479  | 2.640066  | 2.000451  |
| O | -3.349033 | 1.308088  | -0.978316 | O | 2.317176  | -1.016071 | 4.676581  |
| H | -2.171105 | 3.276189  | 1.764835  | C | 2.984871  | 0.269075  | 5.024082  |
| C | -3.598666 | 2.343665  | -0.378936 | C | 3.811223  | 0.466046  | 3.768256  |
| O | -4.434510 | 2.327523  | 0.823652  | O | 4.030070  | -0.829389 | 3.185168  |
| C | -4.387812 | 3.647246  | 1.231606  | C | 3.017963  | -1.609774 | 3.674216  |
| H | -4.818889 | 3.789767  | 2.257504  | H | 2.067137  | 1.016732  | 5.019382  |
| H | -2.536522 | 5.015574  | 1.532161  | H | 4.795439  | 0.934670  | 3.907253  |
| C | -2.900209 | 3.985593  | 1.342774  | H | 3.463595  | 0.137024  | 5.926706  |
| H | -5.014246 | -5.935678 | 3.995494  | H | 3.263399  | 1.208662  | 3.114364  |
| O | -3.173931 | -3.480893 | 2.923289  | C | 1.419716  | -1.801332 | -0.254402 |
| O | -4.540270 | -1.783813 | 3.445438  | C | -0.128709 | -2.183551 | -0.154432 |
| H | -2.822738 | -5.441813 | 2.072457  | H | 2.033535  | -2.354931 | 0.440064  |
| C | -4.316092 | -2.952670 | 3.351349  | H | 1.652577  | -2.207169 | -1.289222 |
| O | -5.260571 | -3.914024 | 3.723705  | H | -0.699575 | -1.671375 | -0.957284 |
| C | -4.769450 | -5.171636 | 3.258113  | H | -0.012645 | -3.347088 | -0.389745 |
| H | -5.418802 | -5.378730 | 2.341013  | C | 3.110306  | -0.222587 | -0.291656 |
| H | -2.668430 | -5.163486 | 3.905128  | O | 1.676231  | -0.426735 | -0.267277 |
| C | -3.226542 | -4.935531 | 3.048608  | H | 3.665817  | -0.616268 | -1.148331 |
| O | -1.281883 | 0.378344  | 2.181279  | H | 3.530421  | -0.785909 | 0.585093  |
| K | -3.717943 | 0.750071  | 3.099269  | H | 3.243032  | 0.882870  | -0.183585 |
| O | -1.546258 | 2.643153  | 3.435981  | H | -4.700936 | 4.502710  | 0.682352  |
| K | -0.094225 | -1.331127 | 4.161680  | O | -2.853419 | 3.164737  | -0.942782 |
| O | 3.688696  | 4.247226  | 1.090209  | O | -3.818412 | 1.072310  | -0.841502 |
| H | 2.843124  | 5.140925  | -0.489445 | H | -1.759616 | 3.660305  | 1.476450  |
| H | 1.707911  | 6.731466  | 1.182526  | C | -3.543170 | 2.216901  | -0.400535 |
| C | 1.798678  | 5.637372  | 1.463347  | O | -4.186811 | 2.505935  | 0.861791  |
| O | 4.826968  | 4.790813  | 3.019169  | C | -4.057446 | 3.850778  | 1.271629  |
| H | 1.924080  | 3.800065  | 0.218628  | H | -4.506908 | 3.840794  | 2.281631  |
| C | 3.845904  | 4.846823  | 2.333087  | H | -2.409600 | 5.197246  | 0.597379  |
| H | 0.876030  | 5.140642  | 1.863187  | C | -2.598176 | 4.295270  | 1.207886  |
| C | 2.508694  | 4.677795  | 0.442712  | H | -3.532271 | -5.569406 | 4.756093  |
| O | 2.769563  | 5.628731  | 2.567472  | O | -3.554103 | -3.284696 | 3.048519  |
| H | -0.732909 | -1.252052 | 1.846791  | O | -5.026026 | -1.816697 | 4.086942  |
| O | -1.165864 | 0.048918  | 7.003303  | H | -4.301459 | -4.715670 | 1.820478  |
| H | -1.280350 | 1.350252  | 8.490775  | C | -4.581170 | -2.954083 | 3.898249  |
| H | -3.014674 | 2.551098  | 7.401796  | O | -5.086869 | -4.110800 | 4.451234  |
| C | -2.416878 | 1.936549  | 6.711463  | C | -4.283151 | -5.275914 | 3.930540  |
| O | -2.636566 | -1.422678 | 6.144320  | H | -5.000418 | -6.083058 | 3.662428  |
| H | -0.201100 | 1.779843  | 7.164152  | H | -2.633658 | -5.006802 | 2.568003  |
| C | -2.328578 | -0.328650 | 6.445320  | C | -3.701407 | -4.647934 | 2.672373  |
| H | -2.303064 | 2.481499  | 5.754829  | O | -1.176795 | 0.304672  | 2.271417  |
| C | -1.220823 | 1.392668  | 7.460823  | K | -3.864725 | 0.308617  | 2.550128  |
| O | -3.173553 | 0.797913  | 6.322182  | O | -1.927164 | 2.289521  | 3.454431  |
| O | 0.122734  | 1.102845  | 4.290232  | K | -0.308544 | -1.418750 | 4.145691  |
| K | -0.605328 | 1.217400  | -0.573542 | O | 3.114145  | 4.001056  | 1.480463  |
| C | -2.088782 | 2.623753  | -4.518661 | H | 2.297771  | 4.829780  | -0.223999 |
| H | -1.650440 | 2.319000  | -5.516480 | H | 1.965569  | 6.796031  | 1.015895  |
| H | -2.723825 | 1.829727  | -4.104524 | C | 1.854311  | 5.892769  | 1.625944  |
| O | -0.175343 | 4.198650  | -2.170296 | O | 4.785665  | 4.504129  | 2.953633  |
| H | -2.804927 | 4.553139  | -5.524599 | H | 1.129549  | 3.911076  | 0.836545  |
| H | -3.759368 | 3.939616  | -4.018405 | C | 3.724917  | 4.809386  | 2.413569  |
| O | -1.878888 | 4.764548  | -3.606203 | H | 0.983243  | 5.835356  | 2.324550  |
| C | -2.724429 | 3.975477  | -4.545132 | C | 1.985244  | 4.604920  | 0.799381  |
| C | -0.914192 | 3.900242  | -3.031225 |   |           |           |           |

|          |           |           |           |          |           |           |           |
|----------|-----------|-----------|-----------|----------|-----------|-----------|-----------|
| O        | 2.897635  | 5.869458  | 2.598540  | O        | -3.638301 | 0.552326  | -0.848603 |
| H        | -0.879347 | -1.215869 | 1.437344  | O        | -3.115038 | -1.328795 | -2.025738 |
| O        | -1.180786 | 1.044015  | 7.257959  | H        | -3.312479 | 1.845479  | 0.734921  |
| H        | -0.761080 | 3.073318  | 7.488873  | C        | -3.310962 | -0.787183 | -0.954590 |
| H        | -3.167799 | 2.589595  | 7.167630  | O        | -3.041633 | -1.295798 | 0.222200  |
| C        | -2.562773 | 2.504390  | 6.207974  | C        | -3.308100 | -0.331656 | 1.285613  |
| O        | -2.056896 | -0.825870 | 6.377632  | H        | -2.351630 | -0.155247 | 1.778404  |
| H        | -0.471952 | 2.445441  | 5.774258  | H        | -4.869811 | 1.134043  | 0.753826  |
| C        | -2.044627 | 0.369616  | 6.456578  | C        | -3.816707 | 0.888498  | 0.589906  |
| H        | -2.757098 | 3.250943  | 5.419123  | O        | -0.091544 | 2.308405  | 0.691822  |
| C        | -1.112765 | 2.427628  | 6.648965  | K        | -0.526660 | 0.217846  | -1.631148 |
| O        | -2.751151 | 1.208476  | 5.698242  | O        | -0.144794 | -0.230613 | 0.753451  |
| O        | 0.371038  | 1.014690  | 4.069924  | K        | 0.387473  | 0.157379  | 4.486050  |
| K        | -0.613660 | 1.200266  | -0.506369 | O        | -5.271898 | 2.889332  | 4.567892  |
| C        | -2.200842 | 1.934430  | -3.570927 | H        | -4.337223 | 2.405952  | 6.437240  |
| H        | -1.889978 | 1.261435  | -4.365672 | H        | -2.082906 | 2.494390  | 5.429760  |
| H        | -2.848304 | 1.392768  | -2.821746 | C        | -2.986113 | 2.471575  | 4.766085  |
| O        | 0.160901  | 3.947884  | -1.976200 | O        | -5.104680 | 4.811833  | 3.362676  |
| H        | -2.971884 | 3.708067  | -4.817118 | H        | -4.650033 | 1.094956  | 5.323032  |
| H        | -3.552970 | 3.711849  | -3.207920 | C        | -4.595574 | 3.907301  | 4.007329  |
| O        | -1.550675 | 4.280437  | -3.450590 | H        | -2.691041 | 1.826538  | 3.929261  |
| C        | -2.649386 | 3.362374  | -3.840344 | C        | -4.272592 | 2.120363  | 5.385336  |
| C        | -0.767263 | 3.502186  | -2.642896 | O        | -3.259095 | 3.829919  | 4.216772  |
| O        | -0.901840 | 2.193633  | -2.862417 | H        | 0.817467  | 3.766945  | 0.600509  |
| <b>D</b> |           |           |           | O        | 3.384433  | -1.335148 | -0.592560 |
| P        | 0.139593  | 1.082256  | 1.617642  | H        | 3.788041  | -0.129342 | 1.165589  |
| O        | 0.490003  | 3.661515  | 5.454353  | H        | 2.473168  | 1.583809  | 0.108715  |
| O        | 1.175588  | 4.660120  | 0.423791  | C        | 3.129093  | 1.027691  | -0.595438 |
| O        | -1.056766 | 1.108929  | 2.656962  | O        | 1.437779  | -1.754883 | -1.847380 |
| O        | 2.284668  | 2.212003  | 4.889252  | H        | 5.044406  | -0.090857 | -0.239890 |
| C        | 3.451194  | 2.401232  | 3.929929  | C        | 2.222336  | -0.978286 | -1.303842 |
| C        | 2.995024  | 3.664257  | 3.199649  | H        | 3.616130  | 1.724998  | -1.267602 |
| O        | 2.134648  | 4.362580  | 4.134510  | C        | 3.960701  | -0.113673 | 0.025172  |
| C        | 1.591731  | 3.444900  | 4.897412  | O        | 2.131382  | 0.355080  | -1.446627 |
| H        | 4.303100  | 2.473014  | 4.609620  | O        | 1.504996  | 1.155327  | 2.290962  |
| H        | 2.437912  | 3.274086  | 2.330768  | K        | -1.335231 | 3.844554  | 2.365823  |
| H        | 3.431545  | 1.527048  | 3.243430  | C        | -3.894764 | -2.637979 | 3.802720  |
| H        | 3.697797  | 4.456416  | 2.893603  | H        | -4.973036 | -2.452345 | 3.610928  |
| C        | -0.492712 | 6.124746  | -0.439474 | H        | -3.460182 | -3.142068 | 2.935672  |
| C        | 0.710108  | 5.262456  | -0.755618 | O        | -1.986327 | -0.634200 | 5.865261  |
| H        | -0.116701 | 6.872436  | 0.350152  | H        | -4.455769 | -3.750973 | 5.670421  |
| H        | -0.839990 | 6.711084  | -1.338269 | H        | -3.173571 | -4.551066 | 4.713935  |
| H        | 0.401541  | 4.486171  | -1.500594 | O        | -2.691088 | -2.791161 | 5.826104  |
| H        | 1.414456  | 5.915621  | -1.255945 | C        | -3.594570 | -3.563723 | 5.051294  |
| C        | -2.540400 | 4.867577  | -0.983328 | C        | -2.601580 | -1.529798 | 5.316035  |
| O        | -1.601191 | 5.356335  | 0.076528  | O        | -3.312187 | -1.363937 | 4.140906  |
| H        | -2.055727 | 3.954480  | -1.414574 | <b>E</b> |           |           |           |
| H        | -2.707979 | 5.444909  | -1.841583 | P        | 1.013443  | 0.738390  | 1.484180  |
| H        | -3.468883 | 4.703200  | -0.473082 | O        | 0.958545  | 4.588825  | 4.423115  |
| H        | 1.465213  | -1.271267 | 2.096172  | O        | -1.314648 | 1.357614  | 4.075186  |
| O        | -0.486545 | -4.051864 | 2.063008  | O        | 1.105192  | -0.128171 | 2.698664  |
| O        | -0.756896 | -4.193657 | 4.407232  | O        | 0.790422  | 5.071674  | 2.195278  |
| H        | -0.439562 | -2.509042 | 0.376294  | C        | 1.852351  | 5.229502  | 1.108272  |
| C        | -0.392244 | -3.681600 | 3.322705  | C        | 2.978432  | 4.214964  | 1.499515  |
| O        | 0.565393  | -2.594248 | 3.397726  | O        | 2.609147  | 3.960211  | 2.948320  |
| C        | 0.930246  | -2.239847 | 2.138036  | C        | 1.365279  | 4.450392  | 3.247590  |
| H        | 1.561711  | -2.989912 | 1.786257  | H        | 1.350361  | 4.960606  | 0.144086  |
| H        | -1.135192 | -1.675040 | 1.852351  | H        | 4.012758  | 4.666653  | 1.515924  |
| C        | -0.248691 | -2.097533 | 1.347115  | H        | 2.182813  | 6.252635  | 1.248091  |
| H        | -4.069155 | -0.783810 | 1.943177  | H        | 2.982054  | 3.260952  | 0.986214  |

|   |           |           |           |                                                |           |           |           |
|---|-----------|-----------|-----------|------------------------------------------------|-----------|-----------|-----------|
| C | -2.529707 | 2.138625  | 5.912539  | H                                              | -5.454584 | -3.327501 | 2.587294  |
| C | -2.056194 | 2.494571  | 4.488176  | O                                              | -3.989242 | -2.541877 | 6.180082  |
| H | -1.675116 | 2.060565  | 6.503867  | H                                              | -4.622005 | -5.982183 | 4.001210  |
| H | -3.273237 | 2.861094  | 6.257045  | H                                              | -3.983032 | -4.931179 | 2.652882  |
| H | -2.942942 | 2.627728  | 3.789592  | O                                              | -3.738796 | -4.162514 | 4.683517  |
| H | -1.516176 | 3.515121  | 4.636794  | C                                              | -4.472342 | -4.907240 | 3.671561  |
| C | -4.511039 | 0.750600  | 5.355325  | C                                              | -4.475339 | -3.209904 | 5.291033  |
| O | -3.102440 | 0.803846  | 5.891687  | O                                              | -5.746952 | -3.228346 | 4.713268  |
| H | -4.901918 | -0.313454 | 5.573269  | <b>Cartesian coordinates (in Å) related to</b> |           |           |           |
| H | -4.543734 | 1.119471  | 4.321860  | <b>Figure S3 in the SI</b>                     |           |           |           |
| H | -5.090178 | 1.446018  | 5.983983  | <b>K<sub>3</sub>VO<sub>4</sub></b>             |           |           |           |
| H | -1.366542 | -2.404216 | -0.343849 | <b>TS-A</b>                                    |           |           |           |
| O | -2.972657 | -2.313864 | 1.882233  | V                                              | -0.484144 | 0.315058  | 3.026688  |
| O | -5.004294 | -1.503063 | 1.070400  | O                                              | -2.340705 | 1.219329  | -0.697880 |
| H | -2.149126 | 0.074593  | 1.327772  | O                                              | 0.583565  | 1.095821  | -0.386149 |
| C | -3.768860 | -1.791019 | 1.027969  | O                                              | -0.227961 | -0.787263 | 4.393842  |
| O | -3.200885 | -1.453928 | -0.245498 | O                                              | -1.142765 | 0.829018  | -2.648654 |
| C | -1.776177 | -1.404617 | -0.177429 | C                                              | -0.926758 | -0.529826 | -3.281751 |
| H | -1.612168 | -0.830161 | -1.072466 | C                                              | -0.552355 | -1.354886 | -1.905038 |
| H | -0.986155 | -1.115764 | 1.823884  | O                                              | -1.499292 | -0.766860 | -1.075513 |
| C | -1.298188 | -0.548186 | 0.989773  | C                                              | -1.620354 | 0.595491  | -1.419276 |
| H | -7.436698 | 0.871903  | 0.054449  | H                                              | -1.825030 | -0.860426 | -3.785048 |
| O | -4.866840 | 1.791602  | 1.812528  | H                                              | 0.371582  | -0.957251 | -1.625184 |
| O | -3.518190 | 2.592988  | 0.171517  | H                                              | -0.087961 | -0.395783 | -4.000517 |
| H | -6.351010 | 0.797510  | 2.667092  | H                                              | -0.569647 | -2.418326 | -1.974518 |
| C | -4.590695 | 2.145478  | 0.528618  | C                                              | 2.083457  | 2.990769  | -0.297458 |
| O | -5.631132 | 1.962634  | -0.320281 | C                                              | 1.602990  | 1.744094  | -1.069451 |
| C | -6.403855 | 0.926850  | 0.378445  | H                                              | 2.616616  | 2.663425  | 0.627175  |
| H | -5.922408 | -0.027870 | 0.266547  | H                                              | 2.895731  | 3.514457  | -0.873426 |
| H | -6.847466 | 2.320302  | 2.046856  | H                                              | 1.259266  | 2.033728  | -2.119560 |
| C | -6.351718 | 1.423023  | 1.792371  | H                                              | 2.560112  | 1.191187  | -1.188174 |
| O | 0.510145  | 2.100193  | 2.041495  | C                                              | 1.418290  | 4.998498  | 0.810548  |
| K | -1.097810 | 3.647150  | 0.367145  | O                                              | 1.041778  | 3.839378  | 0.018801  |
| O | -0.147059 | 0.202253  | 0.493249  | H                                              | 2.160488  | 4.706317  | 1.630762  |
| K | 1.654145  | 1.631408  | 4.468266  | H                                              | 0.464077  | 5.385664  | 1.182702  |
| O | 4.013449  | -0.395754 | 3.372440  | H                                              | 1.831526  | 5.709181  | 0.140569  |
| H | 3.773190  | -2.162823 | 2.268649  | H                                              | -3.598692 | 3.492740  | 5.214790  |
| H | 6.041803  | -1.481099 | 1.734097  | O                                              | -3.449614 | 4.109730  | 2.259764  |
| C | 5.252611  | -0.791517 | 1.420971  | O                                              | -2.194468 | 5.961477  | 2.443711  |
| O | 5.120015  | 1.362059  | 4.108779  | H                                              | -5.183924 | 3.030722  | 2.639852  |
| H | 3.097607  | -0.665469 | 1.436680  | C                                              | -2.949136 | 5.181406  | 2.957163  |
| C | 4.919193  | 0.547728  | 3.255040  | O                                              | -3.467539 | 5.310059  | 4.274526  |
| H | 5.258872  | -0.660367 | 0.335915  | C                                              | -4.199872 | 4.080641  | 4.527339  |
| C | 3.893643  | -1.100825 | 2.012501  | H                                              | -5.194922 | 4.339168  | 4.883539  |
| O | 5.488542  | 0.539014  | 2.060948  | H                                              | -3.648249 | 2.339926  | 3.166374  |
| H | -0.781396 | 1.512283  | 3.200115  | C                                              | -4.221915 | 3.267593  | 3.134671  |
| O | 2.263590  | 3.600467  | -1.959045 | H                                              | -3.906310 | -3.600893 | 6.885120  |
| H | 3.887139  | 2.579232  | -2.574477 | O                                              | -3.844057 | -1.733728 | 4.858982  |
| H | 2.560180  | 1.416626  | -4.113401 | O                                              | -3.794263 | -3.066556 | 2.925706  |
| C | 2.088612  | 1.500118  | -3.062365 | H                                              | -1.923309 | -1.550042 | 5.647917  |
| O | 0.024006  | 4.027721  | -2.014813 | C                                              | -3.679621 | -2.874057 | 4.124784  |
| H | 2.950899  | 1.876521  | -1.021296 | O                                              | -3.190679 | -3.874036 | 4.919354  |
| C | 0.967954  | 3.352872  | -2.323858 | C                                              | -3.035953 | -3.331024 | 6.281953  |
| H | 1.937796  | 0.468395  | -2.655691 | H                                              | -2.114829 | -3.826012 | 6.691305  |
| C | 2.946948  | 2.328078  | -2.090228 | H                                              | -3.273587 | -1.172602 | 6.769042  |
| O | 0.840209  | 2.189860  | -3.060061 | C                                              | -2.924423 | -1.855786 | 5.956235  |
| O | 2.265229  | 0.941956  | 0.566439  | O                                              | -0.327802 | -0.961596 | 1.599105  |
| K | -2.162720 | -1.038475 | 4.319528  | K                                              | -0.619533 | -2.866849 | 3.187205  |
| C | -5.732269 | -3.926332 | 3.455535  | O                                              | 0.713396  | 1.485235  | 3.116824  |
| H | -6.609905 | -4.524673 | 3.381275  | K                                              | -1.062387 | 2.872413  | 0.691786  |

|              |           |           |           |                                    |           |           |           |
|--------------|-----------|-----------|-----------|------------------------------------|-----------|-----------|-----------|
| O            | 0.449626  | 3.897437  | 4.207953  | O                                  | -5.577626 | 2.000174  | 1.556279  |
| H            | -0.385586 | 4.067214  | 6.043286  | H                                  | -2.811306 | 4.436069  | 1.962290  |
| H            | 0.719463  | 2.126500  | 6.895686  | C                                  | -5.176972 | 3.126253  | 1.401877  |
| C            | 0.701995  | 2.236831  | 5.786899  | O                                  | -5.686543 | 4.251455  | 1.966741  |
| O            | 2.708827  | 4.185496  | 3.679168  | C                                  | -4.808896 | 5.353601  | 1.790369  |
| H            | -1.174039 | 2.809125  | 4.994300  | H                                  | -4.520584 | 5.833437  | 2.742847  |
| C            | 1.771273  | 3.716433  | 4.358364  | H                                  | -3.051448 | 5.213505  | 0.332333  |
| H            | 0.635724  | 1.216917  | 5.274323  | C                                  | -3.527456 | 4.700378  | 1.194663  |
| C            | -0.231614 | 3.277776  | 5.301796  | H                                  | -2.743379 | 3.799156  | 4.747940  |
| O            | 1.978258  | 2.906102  | 5.471933  | O                                  | -3.674654 | 1.632029  | 6.494279  |
| H            | 0.375715  | -0.673273 | 0.895537  | O                                  | -5.319032 | 1.021319  | 5.004481  |
| O            | 1.614943  | -3.032177 | 4.991019  | H                                  | -2.949385 | 3.177299  | 7.740167  |
| H            | 3.636330  | -2.575546 | 4.705606  | C                                  | -4.593630 | 1.854443  | 5.505563  |
| H            | 3.401721  | -1.571439 | 7.003766  | O                                  | -4.656294 | 3.194138  | 5.156733  |
| C            | 2.616086  | -1.303386 | 6.301338  | C                                  | -3.423120 | 3.823129  | 5.602832  |
| O            | -0.146491 | -3.459712 | 6.310435  | H                                  | -3.750538 | 4.808610  | 5.919367  |
| H            | 2.399394  | -1.286499 | 4.121322  | H                                  | -1.829908 | 2.656168  | 6.545069  |
| C            | 0.864730  | -2.817939 | 6.082647  | C                                  | -2.891111 | 2.836301  | 6.693991  |
| H            | 2.633345  | -0.203870 | 6.204296  | O                                  | -1.401268 | -0.299777 | 1.307917  |
| C            | 2.667043  | -2.030269 | 4.919785  | K                                  | 0.155466  | -2.267494 | 3.483244  |
| O            | 1.277136  | -1.754964 | 6.835178  | O                                  | 0.371106  | 0.615646  | 2.991916  |
| O            | -2.154452 | 0.872354  | 2.989817  | K                                  | -1.524129 | 1.820763  | -0.278605 |
| K            | -3.181203 | -0.284615 | 1.260365  | O                                  | -0.270703 | 4.012581  | 5.244793  |
| C            | -6.167699 | 2.109367  | -2.594601 | H                                  | -1.048889 | 3.617146  | 3.311398  |
| H            | -5.923613 | 1.451883  | -3.468727 | H                                  | 0.913562  | 2.332351  | 3.077026  |
| H            | -7.147231 | 2.550638  | -2.794039 | C                                  | 1.124472  | 3.394289  | 3.369066  |
| O            | -5.634477 | 1.261602  | 0.739944  | O                                  | 1.364498  | 3.972147  | 6.863973  |
| H            | -4.060530 | 2.996042  | -2.719963 | H                                  | -0.143953 | 5.185542  | 3.420215  |
| H            | -5.405114 | 4.188530  | -2.184860 | C                                  | 0.994978  | 3.833229  | 5.675425  |
| O            | -4.828221 | 2.824881  | -0.804059 | H                                  | 1.720029  | 4.001849  | 2.692653  |
| C            | -5.077647 | 3.141663  | -2.226719 | C                                  | -0.170975 | 4.111069  | 3.778707  |
| C            | -5.546381 | 1.708586  | -0.393046 | O                                  | 1.861722  | 3.424168  | 4.678273  |
| O            | -6.206496 | 1.149659  | -1.489537 | H                                  | 0.494644  | -1.160577 | 0.951656  |
| <b>III-A</b> |           |           |           | O                                  | 1.552782  | -0.672347 | 7.121030  |
| V            | -1.333322 | 0.825912  | 2.557013  | H                                  | 0.430621  | 0.587698  | 8.428397  |
| O            | 2.249045  | -4.030517 | 2.183470  | H                                  | -1.334639 | 0.703857  | 6.741655  |
| O            | 1.187242  | -1.772104 | 0.794900  | C                                  | -0.315859 | 0.582313  | 6.310196  |
| O            | -2.314178 | 0.360111  | 3.876230  | O                                  | 1.395115  | -2.327108 | 5.581879  |
| O            | 0.077400  | -4.013276 | 1.392260  | H                                  | 1.509805  | 1.444716  | 7.245846  |
| C            | -0.518876 | -4.036918 | 0.045146  | C                                  | 0.906775  | -1.351760 | 6.151997  |
| C            | 0.719605  | -4.090765 | -0.843712 | H                                  | -0.220096 | 1.212209  | 5.395164  |
| O            | 1.838233  | -4.475615 | -0.085437 | C                                  | 0.814707  | 0.622989  | 7.378075  |
| C            | 1.491198  | -4.176493 | 1.274879  | O                                  | -0.302179 | -0.793254 | 5.836277  |
| H            | -1.062895 | -4.985754 | 0.074152  | O                                  | -1.902140 | 2.394972  | 2.034409  |
| H            | 0.925460  | -3.060332 | -1.183796 | K                                  | -4.421713 | -0.185836 | 2.569647  |
| H            | -1.258489 | -3.225226 | -0.000061 | C                                  | -4.349447 | 0.338832  | -2.409693 |
| H            | 0.670435  | -4.786888 | -1.725099 | H                                  | -3.818594 | -0.588709 | -2.094274 |
| C            | 2.396929  | 0.320170  | 0.657300  | H                                  | -5.245714 | 0.448634  | -1.785691 |
| C            | 2.266802  | -1.111501 | 0.199863  | O                                  | -2.204461 | 2.740707  | -3.701156 |
| H            | 1.805570  | 0.402717  | 1.606385  | H                                  | -4.643493 | -0.540423 | -4.452134 |
| H            | 3.491355  | 0.579465  | 0.747923  | H                                  | -5.782745 | 0.831141  | -3.995465 |
| H            | 2.269262  | -1.281891 | -0.892049 | O                                  | -3.745817 | 1.324582  | -4.504799 |
| H            | 3.202482  | -1.588722 | 0.622594  | C                                  | -4.763342 | 0.427481  | -3.898225 |
| C            | 1.905610  | 2.563329  | 0.120843  | C                                  | -3.024358 | 1.915284  | -3.547334 |
| O            | 1.801441  | 1.242490  | -0.244381 | O                                  | -3.430207 | 1.474997  | -2.292946 |
| H            | 1.520488  | 3.157427  | -0.821368 | <b>K<sub>3</sub>PO<sub>4</sub></b> |           |           |           |
| H            | 2.940139  | 2.882637  | 0.313213  | <b>TS1-B</b>                       |           |           |           |
| H            | 1.244517  | 2.833064  | 0.996115  | P                                  | -0.094525 | -0.330306 | 1.445357  |
| H            | -5.266900 | 6.102712  | 1.140066  | O                                  | -0.503218 | 4.349000  | 2.563517  |
| O            | -4.119305 | 3.507773  | 0.616374  | O                                  | -0.785389 | 3.195124  | -0.029594 |

|   |           |           |           |             |           |           |           |
|---|-----------|-----------|-----------|-------------|-----------|-----------|-----------|
| O | -0.729897 | -0.663065 | 0.060134  | O           | 0.817200  | -1.620468 | -3.173656 |
| O | 1.615127  | 4.055637  | 1.952310  | H           | 4.022364  | -2.102232 | -0.326454 |
| C | 2.604921  | 4.773143  | 1.261965  | C           | 1.655162  | -1.395236 | -2.330112 |
| C | 1.700342  | 5.615255  | 0.272013  | H           | 3.889405  | 0.243333  | -1.388035 |
| O | 0.379273  | 5.738863  | 0.904393  | C           | 3.039190  | -1.630675 | -0.524775 |
| C | 0.340653  | 4.621289  | 1.771513  | O           | 1.916698  | -0.059141 | -1.883520 |
| H | 3.086487  | 5.338456  | 2.084458  | O           | -0.948099 | 0.352048  | 2.562844  |
| H | 1.467501  | 4.989468  | -0.602079 | K           | -0.257210 | 1.350787  | -1.280300 |
| H | 3.267889  | 4.098534  | 0.746819  | C           | -0.551213 | -2.379119 | 4.442655  |
| H | 2.024525  | 6.625107  | -0.014836 | H           | -0.037518 | -3.292414 | 4.764156  |
| C | -3.039958 | 4.291174  | -0.556551 | H           | -0.487202 | -2.253053 | 3.351883  |
| C | -1.464079 | 4.197109  | -0.733252 | O           | -3.269427 | -2.069595 | 6.593626  |
| H | -3.387023 | 3.276702  | -0.248925 | H           | 0.768109  | -1.096103 | 5.803854  |
| H | -3.307217 | 4.936389  | 0.265670  | H           | -0.340697 | -0.213130 | 4.657805  |
| H | -1.370560 | 4.055313  | -1.827942 | O           | -1.147483 | -1.196813 | 6.351916  |
| H | -0.945821 | 5.195211  | -0.524580 | C           | -0.160903 | -1.107357 | 5.261891  |
| C | -4.245822 | 6.004111  | -1.778524 | C           | -2.241368 | -1.945176 | 5.958276  |
| O | -3.825976 | 4.669346  | -1.719276 | O           | -1.916536 | -2.561921 | 4.785352  |
| H | -3.433973 | 6.708289  | -1.622167 | <b>II-B</b> |           |           |           |
| H | -4.896838 | 6.067101  | -0.910863 | P           | 0.207523  | 0.342212  | 2.104109  |
| H | -4.846232 | 6.241584  | -2.679046 | O           | 0.921946  | 4.902812  | 0.908184  |
| H | -0.474581 | 4.751786  | 5.020443  | O           | 0.741640  | 3.058767  | -1.007709 |
| O | 1.185057  | 2.050514  | 5.824755  | O           | -1.095734 | 1.217714  | 1.906850  |
| O | 0.965437  | 2.179111  | 8.068894  | O           | 1.454803  | 5.829191  | -1.167892 |
| H | 1.560774  | 2.922390  | 3.939837  | C           | 0.619761  | 6.147036  | -2.337440 |
| C | 0.880901  | 2.638793  | 6.977222  | C           | -0.833863 | 6.140066  | -1.834069 |
| O | 0.413830  | 3.972431  | 6.766113  | O           | -0.828198 | 5.721002  | -0.443750 |
| C | 0.449835  | 4.270748  | 5.343527  | C           | 0.577751  | 5.441497  | -0.147623 |
| H | 1.279241  | 4.982864  | 5.133950  | H           | 0.950219  | 7.145300  | -2.641552 |
| H | -0.122612 | 2.363497  | 4.327133  | H           | -1.420525 | 5.396090  | -2.393267 |
| C | 0.752964  | 2.874364  | 4.702328  | H           | 0.807611  | 5.395842  | -3.139976 |
| H | -3.842561 | -2.408774 | 2.649000  | H           | -1.345917 | 7.088738  | -1.949066 |
| O | -4.319345 | -2.336778 | -0.164639 | C           | 1.973562  | 1.387538  | -2.256390 |
| O | -3.100278 | -4.170548 | -0.829380 | C           | 0.811281  | 2.417297  | -2.173362 |
| H | -3.209074 | -0.612628 | 0.194169  | H           | 2.097416  | 1.030919  | -1.205321 |
| C | -3.312171 | -3.286057 | -0.034603 | H           | 1.717752  | 0.480771  | -2.872224 |
| O | -2.604247 | -3.102804 | 1.112539  | H           | 1.095550  | 2.998549  | -3.154655 |
| C | -3.192870 | -1.982720 | 1.870639  | H           | -0.119428 | 1.830644  | -2.365803 |
| H | -2.414943 | -1.397360 | 2.344188  | C           | 4.317894  | 1.180032  | -2.749819 |
| H | -4.804601 | -0.751590 | 1.063266  | O           | 3.124462  | 2.044123  | -2.681221 |
| C | -3.908540 | -1.241042 | 0.722947  | H           | 4.530260  | 0.682727  | -1.784242 |
| O | 1.072325  | 0.765646  | 1.191014  | H           | 5.151917  | 1.929250  | -2.944424 |
| K | -0.215649 | -2.947217 | -0.216520 | H           | 4.158864  | 0.349449  | -3.500109 |
| O | 0.537879  | -1.625201 | 1.825340  | H           | 0.447270  | -0.085156 | 5.346349  |
| K | -2.563227 | 2.093632  | 1.758366  | O           | -0.281947 | -3.007440 | 6.171311  |
| O | -2.696165 | 1.690010  | 6.202815  | O           | -2.385384 | -2.580634 | 6.919450  |
| H | -2.954277 | 1.075763  | 8.215181  | H           | 1.763944  | -2.576312 | 6.122901  |
| H | -3.354872 | 3.443224  | 8.855606  | C           | -1.280898 | -2.205168 | 6.576471  |
| C | -2.874356 | 3.244221  | 7.887124  | O           | -0.902346 | -0.879874 | 6.661499  |
| O | -4.280469 | 2.480330  | 4.776329  | C           | 0.464303  | -0.759051 | 6.171903  |
| H | -1.313906 | 1.743083  | 7.818851  | H           | 1.069473  | -0.280867 | 6.972197  |
| C | -3.731270 | 2.556272  | 5.848277  | H           | 0.828265  | -2.054827 | 4.633873  |
| H | -2.110387 | 4.010234  | 7.691898  | C           | 0.812111  | -2.188861 | 5.729168  |
| C | -2.420976 | 1.844634  | 7.630826  | H           | -4.386755 | -1.112564 | 2.971959  |
| O | -4.010505 | 3.371336  | 6.928796  | O           | -3.703112 | 1.119166  | 0.703864  |
| H | 0.839255  | 1.787870  | 0.956619  | O           | -2.396681 | -0.218133 | -0.632103 |
| O | 2.444597  | -2.278315 | -1.691440 | H           | -4.357097 | 1.773731  | 2.623370  |
| H | 2.315066  | -1.840726 | 0.324607  | C           | -3.063249 | -0.056099 | 0.366079  |
| H | 2.732107  | 0.559612  | -0.068307 | O           | -3.295972 | -1.023510 | 1.286802  |
| C | 2.997575  | -0.093047 | -0.888097 | C           | -3.733457 | -0.379951 | 2.501339  |



|              |           |           |           |   |           |           |           |
|--------------|-----------|-----------|-----------|---|-----------|-----------|-----------|
| H            | -2.860736 | -0.158432 | 3.133394  | C | -3.028178 | 2.170912  | -3.748419 |
| H            | -5.474676 | 0.672461  | 1.741291  | O | -2.960130 | 3.299125  | -2.754121 |
| C            | -4.433948 | 0.872073  | 1.965872  | H | -2.082405 | 1.558485  | -3.654610 |
| O            | 0.572385  | -0.411652 | 0.704691  | H | -3.053830 | 2.667446  | -4.719731 |
| K            | -0.868109 | -2.586800 | 1.003017  | H | -3.985543 | 1.600037  | -3.747451 |
| O            | -0.008427 | -0.900730 | 2.988199  | H | 2.646227  | 2.200974  | 3.467921  |
| K            | 2.336592  | 2.759072  | 0.982508  | O | 2.148642  | 0.681333  | 6.348497  |
| O            | -2.948354 | 4.263648  | 2.973595  | O | 0.175149  | 1.709686  | 6.934269  |
| H            | -1.307290 | 3.039051  | 3.432200  | H | 4.008162  | 0.559115  | 5.373071  |
| H            | -1.902091 | 3.212663  | 5.889474  | C | 1.157692  | 1.612409  | 6.197786  |
| C            | -2.172521 | 4.121132  | 5.292379  | O | 1.394566  | 2.418340  | 5.149115  |
| O            | -5.006500 | 4.976225  | 3.498488  | C | 2.699135  | 2.124600  | 4.586339  |
| H            | -1.004098 | 4.762025  | 3.559486  | H | 3.514042  | 2.783235  | 4.983789  |
| C            | -3.941051 | 4.561841  | 3.864827  | H | 2.555322  | -0.087954 | 4.390917  |
| H            | -1.673141 | 5.006105  | 5.773485  | C | 2.941041  | 0.656904  | 5.107356  |
| C            | -1.759764 | 3.995431  | 3.741242  | H | -4.847996 | -3.206655 | 0.768365  |
| O            | -3.578975 | 4.488492  | 5.226006  | O | -4.100631 | -0.313831 | 0.336564  |
| H            | 0.814045  | 0.169235  | 0.006185  | O | -2.264315 | -0.651468 | -0.974864 |
| O            | 2.831487  | -2.692732 | 0.988744  | H | -4.551141 | -0.619387 | 2.383019  |
| H            | 4.225150  | -1.150555 | 1.034468  | C | -3.048991 | -1.017356 | -0.134759 |
| H            | 4.857619  | -2.664832 | 2.916407  | O | -2.980632 | -2.257654 | 0.398697  |
| C            | 3.874904  | -2.177146 | 2.982339  | C | -4.150159 | -2.490817 | 1.216103  |
| O            | 1.281224  | -4.142715 | 1.851250  | H | -3.748551 | -2.880961 | 2.154266  |
| H            | 2.662913  | -0.730445 | 1.790777  | H | -5.790677 | -1.029157 | 1.159118  |
| C            | 2.230723  | -3.402369 | 1.982561  | C | -4.734719 | -1.070625 | 1.406228  |
| H            | 3.773084  | -1.460030 | 3.767424  | O | 0.592716  | 0.359949  | 0.839174  |
| C            | 3.455175  | -1.530970 | 1.672233  | K | 0.245020  | -1.621200 | -0.901160 |
| O            | 2.831064  | -3.159695 | 3.183874  | O | -0.174559 | -1.844368 | 1.822808  |
| O            | 1.479947  | 1.022212  | 2.522990  | K | -1.343968 | 2.222741  | 3.617676  |
| K            | -1.500843 | 3.031635  | -0.025959 | O | -5.417927 | 2.946059  | 6.253660  |
| C            | -4.861806 | -1.482718 | 5.745220  | H | -5.989004 | 4.478590  | 7.468117  |
| H            | -4.842273 | -2.492337 | 6.243147  | H | -3.574522 | 5.199288  | 7.802051  |
| H            | -3.939610 | -1.360471 | 5.186913  | C | -3.776554 | 4.199830  | 7.390010  |
| O            | -7.260863 | 0.344976  | 4.107507  | O | -4.239190 | 2.738519  | 4.303938  |
| H            | -5.698301 | -0.714561 | 7.584248  | H | -5.390959 | 2.986394  | 8.337394  |
| H            | -4.148380 | 0.131165  | 6.927900  | C | -4.421286 | 3.291456  | 5.376029  |
| O            | -5.879725 | 0.546755  | 5.926116  | H | -3.019954 | 3.489477  | 7.746528  |
| C            | -5.112578 | -0.327381 | 6.725662  | C | -5.225399 | 3.727997  | 7.474393  |
| C            | -6.478528 | -0.142809 | 4.903629  | O | -3.592277 | 4.215999  | 5.955925  |
| O            | -6.084532 | -1.457549 | 4.896287  | H | 0.508810  | 1.319184  | 0.959603  |
| <b>TS2-B</b> |           |           |           | O | 3.082011  | -2.740593 | 0.748482  |
| P            | -0.319718 | -0.341434 | 2.150728  | H | 2.227913  | -2.124570 | 2.545550  |
| O            | -0.724526 | 4.467462  | 1.003203  | H | 2.901188  | 0.102158  | 1.680479  |
| O            | -0.511655 | 3.254943  | -1.074568 | C | 3.699171  | -0.670356 | 1.680208  |
| O            | -1.686553 | 0.249470  | 1.840384  | O | 3.118187  | -2.014672 | -1.371555 |
| O            | 1.376354  | 3.436746  | 0.930452  | H | 4.027372  | -2.619777 | 2.574988  |
| C            | 2.135237  | 3.176429  | -0.262884 | C | 3.432894  | -1.892645 | -0.200723 |
| C            | 2.293602  | 4.609408  | -0.717353 | H | 4.602639  | -0.337705 | 2.151893  |
| O            | 1.075450  | 5.287523  | -0.383106 | C | 3.247891  | -2.069790 | 2.039693  |
| C            | 0.278279  | 4.314880  | 0.300712  | O | 4.113177  | -0.837287 | 0.289574  |
| H            | 3.139752  | 2.690898  | -0.197421 | O | 0.216412  | -0.024475 | 3.533593  |
| H            | 2.472395  | 4.831845  | -1.773131 | K | -2.671551 | 2.311071  | -0.257733 |
| H            | 1.534529  | 2.448443  | -0.869169 | C | -1.511809 | -2.244991 | 4.904061  |
| H            | 3.091323  | 5.139431  | -0.156230 | H | -1.010389 | -3.190966 | 5.161423  |
| C            | -1.716239 | 3.998102  | -3.001549 | H | -1.305845 | -1.830082 | 3.935007  |
| C            | -0.438240 | 3.303245  | -2.465792 | O | -4.838364 | -1.398512 | 5.281372  |
| H            | -1.821452 | 4.961925  | -2.437723 | H | -1.506427 | -1.613744 | 7.075515  |
| H            | -1.509777 | 4.095446  | -4.106199 | H | -0.665209 | -0.455173 | 5.967113  |
| H            | -0.306034 | 2.296673  | -2.934801 | O | -2.798223 | -0.496383 | 5.771220  |
| H            | 0.448392  | 3.763655  | -2.837854 | C | -1.475116 | -1.195352 | 6.078078  |

|              |           |           |           |                                      |           |           |           |
|--------------|-----------|-----------|-----------|--------------------------------------|-----------|-----------|-----------|
| C            | -3.618507 | -1.519081 | 5.369141  | O                                    | -3.436190 | 3.812598  | 5.936771  |
| O            | -2.906741 | -2.628909 | 5.036561  | H                                    | 0.341136  | 2.012944  | -0.950943 |
| <b>III-B</b> |           |           |           | O                                    | 2.963866  | -3.183118 | 1.747946  |
| P            | -0.522448 | 0.679323  | 1.745070  | H                                    | 1.081872  | -2.378145 | 2.396993  |
| O            | -0.820470 | 4.848807  | 0.024107  | H                                    | 1.817855  | -0.093808 | 1.885669  |
| O            | 0.568270  | 2.735455  | -1.535106 | C                                    | 2.539624  | -0.916030 | 1.828449  |
| O            | -1.707577 | 1.432773  | 2.406469  | O                                    | 3.075876  | -3.452840 | -0.505173 |
| O            | 0.775062  | 3.742380  | 1.428595  | H                                    | 2.454786  | -2.372719 | 3.555068  |
| C            | 2.128454  | 3.237410  | 0.852251  | C                                    | 2.983608  | -2.701910 | 0.458764  |
| C            | 2.599683  | 4.530731  | 0.241815  | H                                    | 3.544344  | -0.524516 | 2.196290  |
| O            | 1.407345  | 5.043255  | -0.366695 | C                                    | 2.167509  | -2.258091 | 2.522254  |
| C            | 0.334049  | 4.481548  | 0.311728  | O                                    | 2.791871  | -1.379931 | 0.396822  |
| H            | 2.667715  | 2.825508  | 1.689526  | O                                    | 0.711595  | 1.245853  | 2.500588  |
| H            | 3.404608  | 4.459736  | -0.526350 | K                                    | -2.444156 | 2.602962  | 0.233872  |
| H            | 1.986138  | 2.470230  | 0.053032  | C                                    | -2.551461 | -1.295507 | 7.249008  |
| H            | 2.980686  | 5.249986  | 0.962767  | H                                    | -2.894560 | -0.819572 | 8.177940  |
| C            | -0.331626 | 2.647246  | -3.942116 | H                                    | -1.467353 | -1.360028 | 7.086730  |
| C            | 0.813347  | 2.500809  | -2.902015 | O                                    | -3.987530 | -4.164765 | 5.929954  |
| H            | -0.604033 | 3.727269  | -3.968866 | H                                    | -3.960349 | -0.054903 | 6.034437  |
| H            | -0.091781 | 2.301255  | -4.989821 | H                                    | -2.419100 | -0.264988 | 5.251679  |
| H            | 1.364372  | 1.596990  | -3.162546 | O                                    | -3.619800 | -1.946771 | 5.253806  |
| H            | 1.650182  | 3.217170  | -3.206906 | C                                    | -3.132902 | -0.769019 | 5.881121  |
| C            | -1.887986 | 0.850821  | -4.016616 | C                                    | -3.574979 | -3.041680 | 6.121335  |
| O            | -1.482716 | 2.004797  | -3.321566 | O                                    | -2.938042 | -2.713073 | 7.273004  |
| H            | -1.285244 | -0.019176 | -3.740674 | <b>Na<sub>2</sub>SnO<sub>3</sub></b> |           |           |           |
| H            | -1.885531 | 0.882282  | -5.114023 | <b>TS1-C</b>                         |           |           |           |
| H            | -2.953679 | 0.693604  | -3.705708 | Sn                                   | -0.954670 | -0.075590 | 2.396139  |
| H            | 2.352526  | 1.309090  | 3.941231  | O                                    | -3.849565 | 0.924168  | -0.458527 |
| O            | 0.070181  | -0.006383 | 5.558192  | O                                    | -1.474682 | 1.169880  | 1.000759  |
| O            | -1.037471 | 1.835538  | 6.311448  | O                                    | -2.507785 | -1.196690 | 2.787663  |
| H            | 1.892224  | -0.889096 | 6.057570  | O                                    | -2.004711 | 1.314905  | -1.925875 |
| C            | -0.041472 | 1.321585  | 5.810987  | C                                    | -0.947108 | 0.462198  | -2.389887 |
| O            | 1.079949  | 2.016532  | 5.395869  | C                                    | -1.129542 | -0.871730 | -1.602408 |
| C            | 2.143543  | 1.088007  | 5.007560  | O                                    | -2.383044 | -0.741916 | -0.862943 |
| H            | 2.950586  | 1.276466  | 5.725575  | C                                    | -2.715178 | 0.615269  | -0.864500 |
| H            | 1.350480  | -0.944758 | 4.368879  | H                                    | -1.140833 | 0.268920  | -3.422036 |
| C            | 1.499376  | -0.289413 | 5.247962  | H                                    | -0.401215 | -1.049793 | -0.788615 |
| H            | -3.359301 | -2.903919 | 2.392766  | H                                    | -0.010061 | 0.971892  | -2.182046 |
| O            | -4.078259 | -0.057014 | 0.952979  | H                                    | -1.322954 | -1.793705 | -2.133813 |
| O            | -2.981007 | -0.273706 | -1.019557 | C                                    | 0.258678  | 2.836748  | 0.807490  |
| H            | -4.358004 | -0.273358 | 2.967491  | C                                    | -1.134397 | 2.479124  | 1.192571  |
| C            | -3.284809 | -0.750943 | 0.069209  | H                                    | 0.865105  | 1.931874  | 0.910357  |
| O            | -2.847635 | -1.899998 | 0.578065  | H                                    | 0.353974  | 3.067156  | -0.286570 |
| C            | -3.155382 | -1.863524 | 2.076753  | H                                    | -1.420810 | 2.809725  | 2.238110  |
| H            | -2.165131 | -1.503920 | 2.429425  | H                                    | -1.792582 | 3.092483  | 0.615757  |
| H            | -5.304789 | -1.438232 | 1.886561  | C                                    | 1.705142  | 4.652666  | 1.354262  |
| C            | -4.363800 | -0.930626 | 2.071560  | O                                    | 0.610141  | 3.854264  | 1.666480  |
| O            | -0.507224 | 0.947644  | 0.203082  | H                                    | 2.600877  | 4.056686  | 1.288311  |
| K            | -0.444232 | -1.272040 | -0.930891 | H                                    | 1.800296  | 5.331122  | 2.168044  |
| O            | -0.485746 | -0.888142 | 1.841195  | H                                    | 1.699451  | 5.303353  | 0.437072  |
| K            | -0.540806 | 3.382911  | 3.524571  | H                                    | -3.231131 | 5.470740  | 4.990986  |
| O            | -3.290227 | 4.382052  | 3.755989  | O                                    | -1.601177 | 4.182504  | 6.584893  |
| H            | -4.801035 | 3.137066  | 3.104126  | O                                    | 0.257377  | 3.837662  | 5.264937  |
| H            | -5.364514 | 3.334344  | 5.443733  | H                                    | -2.975739 | 2.666996  | 6.323240  |
| C            | -4.354701 | 2.951978  | 5.252179  | C                                    | -0.913915 | 4.145433  | 5.435124  |
| O            | -1.745332 | 5.132763  | 5.301274  | O                                    | -1.773597 | 4.386748  | 4.380322  |
| H            | -3.209845 | 2.275227  | 3.453561  | C                                    | -3.126209 | 4.391497  | 4.866941  |
| C            | -2.781230 | 4.563039  | 5.024843  | H                                    | -3.732986 | 4.045608  | 4.040259  |
| H            | -4.229743 | 1.923637  | 5.655831  | H                                    | -3.592366 | 4.308739  | 7.028577  |
| C            | -3.936187 | 3.052574  | 3.777971  | C                                    | -2.964747 | 3.784981  | 6.242225  |

|             |           |           |           |    |           |           |           |
|-------------|-----------|-----------|-----------|----|-----------|-----------|-----------|
| H           | -5.601841 | -4.760538 | 2.104197  | C  | -1.132931 | 2.514322  | 1.180218  |
| O           | -5.712108 | -2.110896 | 3.529894  | H  | 0.909988  | 1.898961  | 0.951708  |
| O           | -7.310017 | -1.091656 | 2.329679  | H  | 0.382740  | 3.080111  | -0.226592 |
| H           | -3.657315 | -2.641785 | 3.229986  | H  | -1.213258 | 2.898687  | 2.244946  |
| C           | -6.491694 | -1.959676 | 2.457093  | H  | -1.903744 | 3.095360  | 0.616671  |
| O           | -6.237277 | -2.883742 | 1.439190  | C  | 1.727185  | 4.650427  | 1.360702  |
| C           | -5.220022 | -3.737566 | 1.961000  | O  | 0.618565  | 3.864256  | 1.675508  |
| H           | -4.424478 | -3.856250 | 1.214327  | H  | 2.703796  | 4.069348  | 1.275519  |
| H           | -4.683300 | -3.822012 | 4.093594  | H  | 1.769535  | 5.305123  | 2.265077  |
| C           | -4.662610 | -3.115128 | 3.239410  | H  | 1.556331  | 5.184544  | 0.428680  |
| O           | -1.301365 | 1.108332  | 4.114720  | H  | -3.316509 | 5.403127  | 4.995464  |
| O           | 0.936804  | 0.105380  | 2.504442  | O  | -1.617765 | 4.201579  | 6.593648  |
| Na          | 0.892437  | 1.641694  | 4.356210  | O  | 0.244235  | 3.859797  | 5.269966  |
| O           | 4.989318  | 1.983405  | 7.521156  | H  | -3.029458 | 2.709944  | 6.295866  |
| H           | 5.913879  | 0.337574  | 8.391555  | C  | -0.911852 | 4.146667  | 5.407795  |
| H           | 3.993591  | -0.934262 | 8.051932  | O  | -1.762493 | 4.369997  | 4.380485  |
| C           | 3.776351  | 0.131614  | 8.115193  | C  | -3.153551 | 4.387771  | 4.848735  |
| O           | 4.325619  | 2.049196  | 5.305705  | H  | -3.803832 | 4.018384  | 4.050186  |
| H           | 5.042264  | 1.426871  | 9.549305  | H  | -3.637397 | 4.242856  | 6.979848  |
| C           | 4.268462  | 1.583806  | 6.418054  | C  | -2.980668 | 3.768016  | 6.239276  |
| H           | 2.920248  | 0.357930  | 8.727137  | H  | -5.610560 | -4.763520 | 2.162997  |
| C           | 5.020484  | 0.932829  | 8.517379  | O  | -5.702037 | -2.109292 | 3.538736  |
| O           | 3.467317  | 0.600617  | 6.752226  | O  | -7.306675 | -1.082189 | 2.336043  |
| H           | -2.152667 | 1.302508  | 4.481441  | H  | -3.658592 | -2.629290 | 3.180899  |
| O           | 0.435760  | -5.094383 | 3.003405  | C  | -6.484262 | -1.976397 | 2.447847  |
| H           | 0.344088  | -4.174813 | 1.207661  | O  | -6.225256 | -2.881663 | 1.459270  |
| H           | 2.254009  | -2.512303 | 1.912518  | C  | -5.206484 | -3.754870 | 1.963040  |
| C           | 1.644990  | -3.070497 | 2.682794  | H  | -4.466938 | -3.991326 | 1.203104  |
| O           | 2.153672  | -6.357170 | 3.903114  | H  | -4.641924 | -3.863603 | 4.103854  |
| H           | -0.615497 | -3.351939 | 2.514829  | C  | -4.644565 | -3.128434 | 3.238244  |
| C           | 1.749487  | -5.335235 | 3.388958  | O  | -1.288507 | 1.117089  | 4.138750  |
| H           | 1.509923  | -2.312789 | 3.482282  | O  | 0.935961  | 0.113062  | 2.504272  |
| C           | 0.367901  | -3.826479 | 2.264951  | Na | 0.890823  | 1.641214  | 4.360459  |
| O           | 2.429546  | -4.138326 | 3.255247  | O  | 4.976727  | 1.975911  | 7.504394  |
| Na          | -3.799500 | 0.515402  | 2.110471  | H  | 5.938389  | 0.361387  | 8.440848  |
| C           | -5.504799 | 4.586190  | -0.011666 | H  | 3.948903  | -0.901496 | 8.111643  |
| H           | -5.951780 | 4.111217  | -0.827763 | C  | 3.767601  | 0.153488  | 8.112338  |
| H           | -5.816881 | 5.629368  | -0.080623 | O  | 4.335292  | 2.049762  | 5.278991  |
| O           | -5.073058 | 2.579540  | 2.786761  | H  | 4.928082  | 1.451215  | 9.517941  |
| H           | -3.682759 | 3.724821  | -0.828833 | C  | 4.291833  | 1.602097  | 6.402022  |
| H           | -3.420574 | 5.250153  | 0.135387  | H  | 2.880648  | 0.346732  | 8.739484  |
| O           | -3.797728 | 3.565435  | 1.251181  | C  | 5.004323  | 0.955973  | 8.489072  |
| C           | -4.017566 | 4.349529  | -0.005507 | O  | 3.483907  | 0.598802  | 6.757228  |
| C           | -4.984053 | 3.324262  | 1.805457  | H  | -2.270374 | 1.137208  | 4.347665  |
| O           | -6.044691 | 3.933092  | 1.178012  | O  | 0.434369  | -5.117524 | 3.014495  |
| <b>II-C</b> |           |           |           | H  | 0.407937  | -4.199041 | 1.214694  |
| Sn          | -0.962362 | -0.077859 | 2.398965  | H  | 2.237936  | -2.557839 | 1.974735  |
| O           | -3.856314 | 0.881185  | -0.483459 | C  | 1.630384  | -3.076410 | 2.701045  |
| O           | -1.468952 | 1.155317  | 0.979053  | O  | 2.155920  | -6.355782 | 3.901597  |
| O           | -2.515096 | -1.196116 | 2.764749  | H  | -0.604639 | -3.393078 | 2.522570  |
| O           | -2.005511 | 1.311261  | -1.919731 | C  | 1.757338  | -5.316600 | 3.386993  |
| C           | -0.968764 | 0.453079  | -2.393367 | H  | 1.527097  | -2.303572 | 3.532567  |
| C           | -1.127070 | -0.859351 | -1.606807 | C  | 0.364608  | -3.838541 | 2.255625  |
| O           | -2.338135 | -0.703483 | -0.850231 | O  | 2.437550  | -4.155923 | 3.292018  |
| C           | -2.696242 | 0.618848  | -0.905002 | Na | -3.798062 | 0.516047  | 2.105320  |
| H           | -1.273445 | 0.274165  | -3.424304 | C  | -5.514398 | 4.591054  | -0.022808 |
| H           | -0.332341 | -0.936356 | -0.843233 | H  | -6.028204 | 4.111703  | -0.904850 |
| H           | -0.023494 | 0.938986  | -2.225477 | H  | -5.784633 | 5.668291  | -0.025951 |
| H           | -1.330021 | -1.795738 | -2.163151 | O  | -5.042645 | 2.594194  | 2.785778  |
| C           | 0.282273  | 2.810289  | 0.819293  | H  | -3.663207 | 3.736605  | -0.848409 |

|              |           |           |           |              |           |           |           |
|--------------|-----------|-----------|-----------|--------------|-----------|-----------|-----------|
| H            | -3.456640 | 5.281710  | 0.088140  | H            | -2.925697 | -2.529844 | 4.252311  |
| O            | -3.814645 | 3.581168  | 1.255042  | C            | -3.479455 | -1.367860 | 5.896544  |
| C            | -4.020756 | 4.348898  | 0.012883  | O            | -1.319736 | -2.310456 | 5.714427  |
| C            | -5.009928 | 3.335660  | 1.833265  | H            | -1.188526 | 2.174947  | 2.507328  |
| O            | -6.049189 | 3.929862  | 1.194223  | O            | 2.077012  | -2.217328 | 0.339710  |
| <b>TS2-C</b> |           |           |           | H            | 2.870518  | -0.526756 | 1.240992  |
| Sn           | -0.530089 | -0.382440 | 2.332175  | H            | 1.793476  | 0.925019  | -0.423549 |
| O            | -2.672514 | 4.086445  | 0.623294  | C            | 2.042203  | -0.085373 | -0.786277 |
| O            | -0.790479 | 2.644109  | 1.215048  | O            | 0.391934  | -3.129406 | -0.868979 |
| O            | -1.804779 | -1.625305 | 1.872287  | H            | 3.795213  | -1.239164 | -0.089054 |
| O            | -1.435059 | 2.955662  | -1.068546 | C            | 1.059567  | -2.171841 | -0.551357 |
| C            | -1.486179 | 1.608675  | -1.617276 | H            | 2.600925  | -0.043199 | -1.714232 |
| C            | -2.249591 | 0.715101  | -0.608278 | C            | 2.802495  | -0.973311 | 0.236001  |
| O            | -2.925303 | 1.772010  | 0.157441  | O            | 0.818710  | -0.859714 | -0.984919 |
| C            | -2.153515 | 3.041329  | 0.190808  | Na           | -3.797570 | 0.515240  | 2.110582  |
| H            | -1.988478 | 1.495575  | -2.614789 | C            | -5.722472 | 3.621839  | 2.219815  |
| H            | -1.524059 | 0.051439  | 0.000220  | H            | -4.625753 | 3.816787  | 2.095189  |
| H            | -0.391641 | 1.447391  | -1.741426 | H            | -6.299629 | 4.053892  | 1.386344  |
| H            | -3.023614 | 0.021652  | -0.995393 | O            | -6.385614 | 0.592002  | 3.767122  |
| C            | 0.301712  | 4.631460  | 2.179808  | H            | -5.753155 | 4.589139  | 4.222496  |
| C            | 0.268128  | 3.632917  | 1.033313  | H            | -7.300818 | 4.604527  | 3.329147  |
| H            | 1.401156  | 4.930916  | 2.191454  | O            | -6.842932 | 2.783526  | 4.179440  |
| H            | -0.405868 | 5.458879  | 2.156199  | C            | -6.419171 | 4.035266  | 3.604774  |
| H            | -0.064420 | 4.193757  | 0.145737  | C            | -6.393272 | 1.766392  | 3.438971  |
| H            | 1.175468  | 3.054526  | 0.854608  | O            | -5.821615 | 2.186546  | 2.215114  |
| C            | -0.439852 | 4.477113  | 4.543849  | <b>III-C</b> |           |           |           |
| O            | 0.369283  | 3.921677  | 3.551991  | Sn           | -0.997656 | -0.190095 | 4.615793  |
| H            | -1.495228 | 4.271485  | 4.306988  | O            | -2.840838 | 1.736699  | -0.525421 |
| H            | -0.364894 | 5.570377  | 4.781977  | O            | -0.799294 | 2.015146  | 2.034753  |
| H            | -0.116297 | 4.033954  | 5.479589  | O            | -1.837218 | -1.875309 | 4.374974  |
| H            | 3.244831  | 3.393733  | 10.106564 | O            | -1.114907 | 0.249961  | -0.530465 |
| O            | 3.969816  | 3.681677  | 7.036491  | C            | -0.697524 | -0.822515 | 0.378047  |
| O            | 2.175638  | 2.894042  | 6.049449  | C            | -2.016818 | -1.281794 | 0.990827  |
| H            | 5.572956  | 3.135589  | 8.329726  | O            | -2.853981 | -0.075299 | 0.857469  |
| C            | 2.759475  | 3.066138  | 7.076893  | C            | -2.299827 | 0.733800  | -0.098238 |
| O            | 2.365554  | 2.737037  | 8.324502  | H            | -0.193052 | -1.599899 | -0.207404 |
| C            | 3.522840  | 2.838061  | 9.187061  | H            | -1.958103 | -1.551813 | 2.057118  |
| H            | 3.780593  | 1.777515  | 9.462988  | H            | -0.012913 | -0.382243 | 1.116014  |
| H            | 4.771521  | 4.580482  | 8.705732  | H            | -2.501624 | -2.089245 | 0.427818  |
| C            | 4.611474  | 3.589109  | 8.399655  | C            | 0.571689  | 3.465648  | 0.713192  |
| H            | -3.883201 | -4.483471 | -0.412600 | C            | -0.726499 | 3.336082  | 1.492556  |
| O            | -4.150191 | -3.788657 | 2.399832  | H            | 0.623436  | 2.671166  | -0.054324 |
| O            | -5.296532 | -1.781047 | 2.208919  | H            | 0.624367  | 4.448225  | 0.207488  |
| H            | -2.054200 | -3.808751 | 2.038402  | H            | -0.765551 | 4.098048  | 2.290457  |
| C            | -4.537764 | -2.653662 | 1.741999  | H            | -1.568054 | 3.529672  | 0.800537  |
| O            | -4.063588 | -2.600223 | 0.501846  | C            | 2.943942  | 3.288535  | 0.960606  |
| C            | -3.298731 | -3.822817 | 0.255949  | O            | 1.676382  | 3.324704  | 1.630235  |
| H            | -2.379014 | -3.570732 | -0.292712 | H            | 2.970352  | 2.481443  | 0.206930  |
| H            | -2.961158 | -5.403193 | 1.735408  | H            | 3.707693  | 3.081897  | 1.723798  |
| C            | -2.979319 | -4.330763 | 1.638876  | H            | 3.157093  | 4.251343  | 0.463896  |
| O            | -1.552374 | 1.326964  | 3.172420  | H            | -3.319923 | 5.459235  | 5.348226  |
| O            | 1.246841  | 0.089205  | 2.635325  | O            | -1.550305 | 3.402458  | 6.542073  |
| Na           | 0.891677  | 1.641742  | 4.357403  | O            | 0.334309  | 3.707168  | 5.300324  |
| O            | -2.409453 | -0.360342 | 5.867044  | H            | -3.280137 | 2.442343  | 5.947865  |
| H            | -3.856611 | -1.532558 | 6.940533  | C            | -0.868725 | 3.830418  | 5.451962  |
| H            | -3.063514 | -3.574744 | 5.815525  | O            | -1.675363 | 4.467078  | 4.565259  |
| C            | -2.721267 | -2.616706 | 5.356200  | C            | -3.046652 | 4.435278  | 5.054817  |
| O            | -0.145220 | -0.382347 | 5.748017  | H            | -3.688650 | 4.082709  | 4.235421  |
| H            | -4.312243 | -1.028187 | 5.277471  | H            | -3.498358 | 3.805528  | 7.138739  |
| C            | -1.193281 | -0.944204 | 5.749762  | C            | -2.974914 | 3.457542  | 6.239159  |

|                             |           |           |           |   |           |           |           |
|-----------------------------|-----------|-----------|-----------|---|-----------|-----------|-----------|
| H                           | -4.603942 | -4.761539 | 2.743147  | C | 1.880576  | 2.935461  | 0.151125  |
| O                           | -4.716910 | -2.759108 | 4.904645  | C | 0.525668  | 2.839883  | 0.840134  |
| O                           | -5.132870 | -0.869963 | 3.706231  | H | 1.961441  | 2.030227  | -0.489708 |
| H                           | -2.877321 | -3.689219 | 5.059027  | H | 1.956001  | 3.848643  | -0.435224 |
| C                           | -4.720360 | -2.018893 | 3.776691  | H | 0.413432  | 1.894369  | 1.389575  |
| O                           | -4.270974 | -2.714195 | 2.702872  | H | 0.185770  | 3.693017  | 1.439198  |
| C                           | -3.865420 | -4.048403 | 3.136684  | C | 3.325476  | 4.067691  | 1.754786  |
| H                           | -2.867071 | -4.250528 | 2.722383  | O | 2.984318  | 2.841115  | 1.020312  |
| H                           | -4.340096 | -4.784618 | 5.179185  | H | 4.132666  | 3.989700  | 2.450925  |
| C                           | -3.876514 | -3.932062 | 4.667632  | H | 2.464601  | 4.477498  | 2.349905  |
| O                           | -2.005542 | 1.438332  | 4.165222  | H | 3.623534  | 4.817347  | 1.029863  |
| O                           | 0.877708  | 0.147816  | 4.829886  | H | -3.988904 | 5.187688  | 4.384596  |
| Na                          | 1.078514  | 2.109520  | 3.609388  | O | -2.846802 | 2.912974  | 6.359186  |
| O                           | 4.082624  | 0.065898  | 5.393698  | O | -0.714034 | 3.431506  | 6.278226  |
| H                           | 2.324955  | -0.151676 | 6.471128  | H | -4.649560 | 2.554359  | 5.432588  |
| H                           | 1.996862  | 2.211695  | 6.617880  | C | -1.792969 | 3.556276  | 5.797921  |
| C                           | 3.029305  | 1.910881  | 6.394172  | O | -2.149338 | 4.292947  | 4.723891  |
| O                           | 4.258968  | 0.951629  | 3.293001  | C | -3.562173 | 4.178009  | 4.415624  |
| H                           | 3.843765  | 0.140336  | 7.457538  | H | -3.681780 | 3.712606  | 3.451125  |
| C                           | 3.902319  | 1.022767  | 4.447712  | H | -4.543917 | 4.142383  | 6.326704  |
| H                           | 3.749471  | 2.539040  | 6.938322  | C | -4.053404 | 3.428731  | 5.651807  |
| C                           | 3.270391  | 0.405804  | 6.560451  | H | -7.444914 | -4.091280 | 2.939937  |
| O                           | 3.252739  | 2.119108  | 4.967099  | O | -5.283144 | -2.247779 | 2.907974  |
| H                           | -1.370004 | 1.932747  | 2.921193  | O | -5.450697 | -1.359826 | 0.813874  |
| O                           | 0.823850  | -2.672835 | 2.446947  | H | -4.409619 | -4.067885 | 3.346270  |
| H                           | 2.634808  | -3.083433 | 3.385027  | C | -5.684865 | -2.257393 | 1.616723  |
| H                           | 1.479259  | -4.386134 | 5.113468  | O | -6.304482 | -3.468417 | 1.301879  |
| C                           | 0.850915  | -3.681436 | 4.554118  | C | -6.468866 | -4.267935 | 2.524894  |
| O                           | -0.797898 | -3.985065 | 1.536312  | H | -6.316889 | -5.366082 | 2.264618  |
| H                           | 1.678496  | -1.687387 | 4.076575  | H | -5.728581 | -3.517403 | 4.460618  |
| C                           | -0.044672 | -3.721027 | 2.454210  | C | -5.382583 | -3.609502 | 3.421458  |
| H                           | 0.141655  | -3.152351 | 5.209036  | O | 1.638099  | 0.127195  | 1.399194  |
| C                           | 1.638149  | -2.713481 | 3.663769  | O | 1.348804  | -0.779184 | 3.976641  |
| O                           | 0.053672  | -4.447498 | 3.599925  | O | 2.734026  | 5.513141  | 4.946902  |
| Na                          | -3.797380 | 0.890498  | 2.953056  | H | 1.444367  | 6.596495  | 6.251881  |
| C                           | -5.634284 | 2.853678  | -1.030457 | H | 2.230792  | 5.061610  | 7.975280  |
| H                           | -5.205389 | 2.045838  | -1.637695 | C | 2.172194  | 4.592931  | 7.000252  |
| H                           | -6.663092 | 3.077359  | -1.343829 | O | 4.842407  | 4.601048  | 4.811193  |
| O                           | -4.723769 | 2.993712  | 2.311063  | H | 0.817310  | 5.150593  | 5.472377  |
| H                           | -3.761194 | 3.931374  | -1.485688 | C | 3.749424  | 4.749059  | 5.361070  |
| H                           | -5.200149 | 5.017835  | -1.324646 | H | 1.578868  | 3.654447  | 7.044692  |
| O                           | -4.432473 | 4.257067  | 0.445497  | C | 1.689129  | 5.528978  | 5.907298  |
| C                           | -4.718147 | 4.096016  | -0.972878 | O | 3.547590  | 4.278695  | 6.628205  |
| C                           | -4.923355 | 3.195355  | 1.123794  | H | -0.574138 | 0.514223  | -0.518423 |
| O                           | -5.682389 | 2.389951  | 0.346945  | O | 3.593250  | -5.742030 | 5.049500  |
| <b>VO(OiPr)<sub>3</sub></b> |           |           |           | H | 3.793431  | -3.957238 | 6.115819  |
| <b>TS-D</b>                 |           |           |           | H | 1.771788  | -3.168694 | 4.918862  |
| V                           | 0.627762  | -0.741584 | 2.312048  | C | 2.360889  | -3.879829 | 4.345294  |
| O                           | -2.022924 | 4.122602  | 0.348631  | O | 2.019681  | -7.317375 | 4.623022  |
| O                           | -0.331283 | 2.714537  | -0.408446 | H | 4.621397  | -3.985209 | 4.542863  |
| O                           | 0.450427  | -2.415931 | 1.656736  | C | 2.381133  | -6.167628 | 4.582786  |
| O                           | -2.211540 | 2.900542  | -1.546802 | H | 2.511311  | -3.384705 | 3.355623  |
| C                           | -1.716321 | 1.867996  | -2.482325 | C | 3.693807  | -4.296213 | 5.051753  |
| C                           | -1.958506 | 0.414751  | -1.894737 | O | 1.638685  | -5.117569 | 4.140328  |
| O                           | -0.872551 | -0.121720 | -1.168977 | O | -0.845223 | 0.306978  | 2.270165  |
| C                           | -1.536129 | 3.286297  | -0.395995 | C | -6.836208 | 1.358920  | 0.784082  |
| H                           | -2.347528 | 2.008476  | -3.312961 | H | -6.054568 | 0.538733  | 0.704168  |
| H                           | -2.146698 | -0.216145 | -2.755709 | H | -7.719279 | 1.005957  | 0.334803  |
| H                           | -0.700786 | 2.065439  | -2.779168 | O | -6.624321 | 3.184861  | 3.766780  |
| H                           | -2.925440 | 0.404749  | -1.368145 | H | -5.344603 | 2.801034  | -0.271136 |

|             |           |           |           |   |           |           |           |
|-------------|-----------|-----------|-----------|---|-----------|-----------|-----------|
| H           | -7.014706 | 3.434014  | -0.063800 | H | -5.182637 | 5.686326  | 2.008302  |
| O           | -5.969647 | 3.436892  | 1.613966  | O | -3.813302 | 6.425578  | 4.806618  |
| C           | -6.203683 | 2.789256  | 0.345119  | O | -5.584238 | 6.567236  | 6.182681  |
| C           | -6.545470 | 2.747758  | 2.633960  | H | -3.046551 | 7.445972  | 3.188656  |
| O           | -7.044294 | 1.547708  | 2.237263  | C | -5.147214 | 6.413682  | 5.058965  |
| C           | 2.385979  | 0.068433  | 4.474271  | O | -5.869874 | 6.301761  | 3.933984  |
| C           | 2.138249  | 1.556323  | 4.391869  | C | -5.039965 | 6.444656  | 2.750929  |
| C           | 3.710012  | -0.228662 | 3.735373  | H | -5.204579 | 7.421526  | 2.233391  |
| H           | 2.468327  | -0.233433 | 5.540532  | H | -2.911901 | 5.662533  | 3.129179  |
| C           | 0.635769  | -2.920739 | 0.296268  | C | -3.583854 | 6.504782  | 3.354883  |
| H           | 1.111508  | -2.176023 | -0.346980 | H | -0.863042 | -8.720926 | 1.280088  |
| C           | -0.783275 | -3.315564 | -0.244269 | O | -0.505840 | -6.977576 | -1.100760 |
| C           | 1.537485  | -4.157411 | 0.426390  | O | -1.165502 | -5.002814 | -0.195442 |
| C           | -1.828439 | 0.418658  | 3.313123  | H | -1.256019 | -8.753068 | -1.919050 |
| C           | -1.836620 | -0.748414 | 4.317901  | C | -1.196837 | -6.221243 | -0.213589 |
| C           | -3.176495 | 0.563667  | 2.592935  | O | -1.905918 | -7.060456 | 0.652913  |
| H           | -1.564234 | 1.324715  | 3.885042  | C | -1.503235 | -8.459238 | 0.436342  |
| H           | 3.480014  | 0.038944  | 2.687720  | H | -2.370557 | -9.095971 | 0.547238  |
| H           | 3.885840  | -1.315029 | 3.752303  | H | 0.231451  | -8.914904 | -0.850112 |
| H           | 4.598583  | 0.208011  | 4.127474  | C | -0.732402 | -8.438249 | -0.946224 |
| H           | 2.077445  | 1.940105  | 3.373391  | O | -0.954640 | 0.941452  | 1.400117  |
| H           | 2.897712  | 2.112189  | 4.978400  | O | -2.214439 | -1.381977 | 0.726340  |
| H           | 1.206004  | 1.837439  | 4.896632  | O | 1.439989  | -4.230193 | 8.312985  |
| H           | 2.560133  | -3.822802 | 0.806712  | H | 1.572059  | -3.206054 | 10.095864 |
| H           | 1.627179  | -4.678701 | -0.529203 | H | -0.755809 | -2.419830 | 9.393539  |
| H           | 1.085774  | -4.821489 | 1.153292  | C | 0.049538  | -2.344549 | 8.673345  |
| H           | -1.401765 | -2.397619 | -0.158343 | O | 0.362152  | -5.084821 | 6.470955  |
| H           | -1.173613 | -4.149390 | 0.362644  | H | 2.259320  | -2.253066 | 8.779213  |
| H           | -0.622253 | -3.649614 | -1.279551 | C | 0.510026  | -4.235064 | 7.296674  |
| H           | -2.232556 | -1.723041 | 3.912526  | H | 0.132803  | -1.340102 | 8.271657  |
| H           | -2.489455 | -0.428321 | 5.210041  | C | 1.430600  | -2.953405 | 9.022351  |
| H           | -0.811000 | -0.852598 | 4.770339  | O | -0.306596 | -3.128280 | 7.437801  |
| H           | -3.266518 | -0.094248 | 1.732233  | H | 1.231938  | 5.339264  | 4.517461  |
| H           | -3.329122 | 1.565356  | 2.258561  | O | -4.883658 | 2.170695  | 2.560709  |
| H           | -4.027127 | 0.285315  | 3.341238  | H | -5.125210 | 2.232082  | 4.657403  |
| <b>II-D</b> |           |           |           | H | -2.899916 | 2.951155  | 4.857958  |
| V           | -0.957690 | -0.240636 | 0.289447  | C | -3.040903 | 2.234602  | 4.018468  |
| O           | 4.328739  | 3.866448  | 4.287562  | O | -4.018411 | 3.501459  | 0.925029  |
| O           | 1.837981  | 5.871767  | 4.049851  | H | -4.600204 | 0.669389  | 4.013231  |
| O           | 0.575264  | -1.135308 | 0.247657  | C | -3.894630 | 2.929492  | 1.979884  |
| O           | 2.337522  | 3.045866  | 3.810964  | H | -2.284224 | 1.441325  | 4.010433  |
| C           | 1.113782  | 2.883245  | 4.450287  | C | -4.471020 | 1.759867  | 3.893506  |
| C           | 1.625854  | 3.046094  | 6.007466  | O | -2.787891 | 3.019244  | 2.779860  |
| O           | 2.667115  | 3.896145  | 5.971332  | O | -1.130727 | 0.357806  | -1.331155 |
| C           | 3.181853  | 3.736788  | 4.568653  | C | 0.041729  | -1.646902 | 3.879544  |
| H           | 0.432112  | 3.765421  | 4.245539  | H | -0.182044 | -2.729119 | 3.911152  |
| H           | 1.994341  | 2.133668  | 6.436634  | H | -0.489907 | -1.141972 | 3.017853  |
| H           | 0.698126  | 1.944198  | 4.174819  | O | 0.025335  | 0.047072  | 6.956479  |
| H           | 0.743059  | 3.377219  | 6.530074  | H | 2.202540  | -2.102155 | 4.201552  |
| C           | 1.070654  | 5.756194  | 1.748928  | H | 1.873851  | -0.522177 | 3.280093  |
| C           | 1.232817  | 6.602272  | 2.994673  | O | 1.521481  | -0.507785 | 5.366424  |
| H           | 2.092281  | 5.452122  | 1.303531  | C | 1.527507  | -1.229834 | 4.076764  |
| H           | 0.583685  | 4.741416  | 1.850635  | C | 0.297623  | -0.507677 | 5.941723  |
| H           | 1.732598  | 7.488683  | 2.702811  | O | -0.602171 | -1.203381 | 5.137631  |
| H           | 0.270651  | 7.133037  | 3.174826  | C | -3.547053 | -1.450828 | 1.258895  |
| C           | -0.808480 | 6.805783  | 0.352207  | C | -3.482973 | -2.176233 | 2.598727  |
| O           | 0.570690  | 6.576641  | 0.628970  | C | -4.593668 | -2.097710 | 0.304455  |
| H           | -1.369568 | 6.367628  | -0.458883 | H | -3.911450 | -0.366529 | 1.333777  |
| H           | -1.031813 | 7.884923  | 0.185925  | C | 1.193257  | -2.021253 | -0.699025 |
| H           | -1.316200 | 6.571637  | 1.398767  | H | 0.403916  | -2.641955 | -1.144170 |

|                                                |           |           |           |             |           |           |           |
|------------------------------------------------|-----------|-----------|-----------|-------------|-----------|-----------|-----------|
| C                                              | 2.074318  | -3.003073 | 0.069876  | H           | 2.099573  | -1.585623 | 7.769359  |
| C                                              | 2.074759  | -1.241325 | -1.698172 | C           | 1.388429  | -2.013610 | 7.080411  |
| C                                              | -0.883215 | 1.781277  | -1.610193 | H           | -2.344817 | -3.581486 | 2.650590  |
| C                                              | -1.192036 | 1.991174  | -3.066915 | O           | -4.066155 | -1.824875 | 4.508684  |
| C                                              | 0.541449  | 2.317713  | -1.284542 | O           | -2.451389 | -0.270478 | 4.799806  |
| H                                              | -1.581280 | 2.394809  | -1.039944 | H           | -4.708708 | -3.794887 | 4.583927  |
| H                                              | -4.303142 | -3.149474 | 0.035727  | C           | -2.796506 | -1.413595 | 4.542693  |
| H                                              | -4.594667 | -1.486645 | -0.647451 | O           | -1.915251 | -2.437338 | 4.307548  |
| H                                              | -5.597044 | -2.056334 | 0.719627  | C           | -2.627032 | -3.522316 | 3.707074  |
| H                                              | -3.058665 | -3.193748 | 2.444834  | H           | -2.416486 | -4.449790 | 4.251228  |
| H                                              | -4.508224 | -2.324133 | 2.933038  | H           | -4.706527 | -3.035425 | 2.979594  |
| H                                              | -2.940377 | -1.600089 | 3.348535  | C           | -4.123641 | -3.162734 | 3.910296  |
| H                                              | 2.590321  | -0.439229 | -1.179462 | O           | -4.455913 | -1.058552 | -0.770640 |
| H                                              | 1.496405  | -0.750770 | -2.479825 | K           | -2.709882 | 1.981008  | 2.860954  |
| H                                              | 2.802505  | -1.943942 | -2.137625 | O           | -2.581302 | -1.786553 | 1.275275  |
| H                                              | 1.612554  | -3.467843 | 0.946612  | K           | -0.102928 | -1.421301 | 1.777987  |
| H                                              | 3.022768  | -2.567926 | 0.424372  | O           | -0.958522 | -3.319893 | -1.662918 |
| H                                              | 2.356489  | -3.835316 | -0.557660 | H           | -2.092067 | -2.836977 | -3.366835 |
| H                                              | -0.663943 | 1.230614  | -3.645714 | H           | -1.717205 | -0.462872 | -2.989909 |
| H                                              | -0.988081 | 3.002001  | -3.488015 | C           | -1.639437 | -1.090090 | -2.093366 |
| H                                              | -2.288446 | 1.862088  | -3.170302 | O           | 1.013020  | -2.740664 | -0.589578 |
| H                                              | 1.295101  | 1.984445  | -1.953308 | H           | -3.023798 | -2.770839 | -1.777085 |
| H                                              | 0.850812  | 1.907600  | -0.296308 | C           | 0.043301  | -2.478714 | -1.292097 |
| H                                              | 0.543687  | 3.396199  | -1.224380 | H           | -2.065571 | -0.620659 | -1.195517 |
| <b>Cartesian coordinates (in Å) related to</b> |           |           |           | C           | -2.072816 | -2.561819 | -2.296089 |
| <b>Figure S4 in the SI</b>                     |           |           |           | O           | -0.175988 | -1.224622 | -1.732547 |
| <b>K<sub>3</sub>VO<sub>4</sub></b>             |           |           |           | H           | -5.390670 | -0.805048 | -0.813904 |
| <b>TS1-A</b>                                   |           |           |           | O           | -4.667376 | 1.777042  | 5.182904  |
| V                                              | -3.598373 | -0.506993 | 0.779711  | H           | -5.343943 | -0.167731 | 4.948014  |
| O                                              | -1.117804 | 4.270957  | 0.300429  | H           | -7.377184 | 0.564762  | 6.034451  |
| O                                              | 0.989019  | 4.761789  | 1.079118  | C           | -6.440917 | 0.933277  | 6.493656  |
| O                                              | -4.422546 | 0.083122  | 2.092443  | O           | -5.142090 | 3.991694  | 5.353105  |
| O                                              | -0.843131 | 6.205607  | 1.499883  | H           | -4.403309 | 0.109216  | 6.471885  |
| C                                              | -0.566758 | 6.474490  | 2.857047  | C           | -5.380976 | 2.837422  | 5.633408  |
| C                                              | -1.094589 | 5.099933  | 3.621928  | H           | -6.492874 | 0.691980  | 7.572247  |
| O                                              | -0.471148 | 4.127438  | 2.966611  | C           | -5.159929 | 0.522388  | 5.779202  |
| C                                              | -0.450182 | 4.947395  | 1.100232  | O           | -6.433800 | 2.399693  | 6.402024  |
| H                                              | 0.516641  | 6.483095  | 2.873675  | O           | -2.633560 | 0.826155  | 0.343023  |
| H                                              | -2.156035 | 5.090812  | 3.786857  | K           | -1.851578 | 2.561176  | -1.271302 |
| H                                              | -1.011334 | 7.476942  | 3.096313  | C           | 1.762151  | 3.528244  | 5.369562  |
| H                                              | -0.689759 | 5.137056  | 4.648887  | H           | 1.150808  | 4.399864  | 5.540475  |
| C                                              | 2.224323  | 3.405665  | -0.734053 | H           | 2.370981  | 3.136900  | 6.210995  |
| C                                              | 1.739230  | 4.747552  | -0.256192 | O           | -0.194045 | 1.494434  | 3.439995  |
| H                                              | 3.234234  | 3.460751  | -1.155913 | H           | 2.603641  | 4.407500  | 3.426451  |
| H                                              | 2.274477  | 2.683458  | 0.093133  | H           | 3.566971  | 3.161134  | 4.245304  |
| H                                              | 2.663534  | 5.196238  | 0.042003  | O           | 1.777179  | 2.530748  | 3.261776  |
| H                                              | 1.152549  | 5.381526  | -0.989566 | C           | 2.531776  | 3.526515  | 4.040978  |
| C                                              | 1.736479  | 2.779609  | -3.050547 | C           | 0.712604  | 2.115581  | 3.924235  |
| O                                              | 1.271374  | 2.746746  | -1.650395 | O           | 0.694248  | 2.528511  | 5.200690  |
| H                                              | 2.610025  | 2.122270  | -3.027332 | <b>II-A</b> |           |           |           |
| H                                              | 2.100163  | 3.798855  | -3.374509 | V           | -0.160719 | -1.173695 | 2.782407  |
| H                                              | 0.841960  | 2.463784  | -3.684635 | O           | -0.621771 | 6.479079  | -1.962531 |
| H                                              | 0.663371  | 0.063711  | 6.681030  | O           | -0.154447 | 4.789776  | -0.628424 |
| O                                              | 2.076485  | -2.695911 | 6.002254  | O           | -1.435096 | -1.441466 | 1.589370  |
| O                                              | 2.144295  | -2.471603 | 3.766950  | O           | -1.708924 | 4.431222  | -2.247676 |
| H                                              | 0.826336  | -2.772642 | 7.632516  | C           | -1.334653 | 2.903843  | -2.324774 |
| C                                              | 1.726863  | -2.111396 | 4.830732  | C           | -2.402842 | 1.786800  | -2.102824 |
| O                                              | 0.891042  | -1.025188 | 4.981797  | O           | -3.009767 | 1.713215  | -0.815223 |
| C                                              | 0.468294  | -0.953469 | 6.350410  | C           | -0.870793 | 5.315736  | -1.685129 |
| H                                              | -0.619643 | -1.094411 | 6.454999  | H           | -1.089690 | 2.829526  | -3.375544 |

|   |           |           |           |              |           |           |           |
|---|-----------|-----------|-----------|--------------|-----------|-----------|-----------|
| H | -1.723117 | 0.897809  | -2.415092 | K            | -0.888060 | 1.967293  | 1.503270  |
| H | -0.388076 | 2.737450  | -1.807180 | C            | -5.822168 | 2.451876  | -1.305862 |
| H | -3.197382 | 1.923653  | -2.862015 | H            | -5.453448 | 2.279450  | -2.279595 |
| C | 1.794897  | 4.717220  | 0.815971  | H            | -6.923992 | 2.698828  | -1.389943 |
| C | 1.288325  | 4.884619  | -0.631748 | O            | -4.631227 | 1.732447  | 1.817828  |
| H | 2.920163  | 4.782538  | 0.834348  | H            | -4.055929 | 3.817805  | -1.379980 |
| H | 1.479129  | 5.554546  | 1.454660  | H            | -5.621422 | 4.702629  | -0.936061 |
| H | 1.521776  | 5.893151  | -1.052442 | O            | -4.787651 | 3.597736  | 0.545725  |
| H | 1.754028  | 4.072782  | -1.203481 | C            | -5.007482 | 3.761543  | -0.890119 |
| C | 2.088346  | 3.029628  | 2.401176  | C            | -4.955877 | 2.275238  | 0.768147  |
| O | 1.411917  | 3.398110  | 1.188855  | O            | -5.551621 | 1.588157  | -0.277730 |
| H | 1.789254  | 3.730165  | 3.244791  |              |           |           |           |
| H | 3.118082  | 3.234081  | 2.192967  | <b>TS2-A</b> |           |           |           |
| H | 1.834362  | 1.999138  | 2.674458  | V            | -1.268709 | -0.733818 | 2.876840  |
| H | -2.876952 | -0.181921 | 5.268610  | O            | -0.770216 | 3.632566  | -3.653287 |
| O | -3.033522 | 2.998010  | 4.750036  | O            | -0.222095 | 2.554431  | -1.686685 |
| O | -0.896353 | 3.581999  | 5.262420  | O            | -2.469982 | -0.075295 | 3.859079  |
| H | -4.846958 | 2.003458  | 4.886192  | O            | -2.182392 | 2.174408  | -2.679135 |
| C | -1.776276 | 2.755034  | 5.187702  | C            | -2.887414 | 1.721507  | -1.483874 |
| O | -1.696855 | 1.458745  | 5.650980  | C            | -3.099090 | 2.847946  | -0.278644 |
| C | -3.076395 | 0.811802  | 5.675768  | O            | -4.114021 | 2.501703  | 0.587122  |
| H | -3.546806 | 0.730078  | 6.680265  | C            | -1.040532 | 2.841806  | -2.739268 |
| H | -3.660209 | 1.303362  | 3.657276  | H            | -3.903970 | 1.487325  | -1.727173 |
| C | -3.753487 | 1.749225  | 4.671558  | H            | -3.261866 | 3.694690  | -0.905161 |
| H | -3.598530 | -4.340860 | 2.807220  | H            | -2.349260 | 0.849904  | -0.991306 |
| O | -3.438221 | -3.075850 | 5.532661  | H            | -2.122890 | 3.138869  | 0.297720  |
| O | -5.147673 | -1.602555 | 5.374297  | C            | 0.615746  | 4.906439  | -1.009170 |
| H | -1.498804 | -3.396161 | 4.780545  | C            | 0.910516  | 3.527434  | -1.445327 |
| C | -4.336524 | -2.354952 | 4.857372  | H            | 1.610558  | 5.420671  | -1.180281 |
| O | -4.210289 | -2.519793 | 3.559568  | H            | -0.110261 | 5.378044  | -1.639664 |
| C | -3.105303 | -3.488171 | 3.272015  | H            | 1.395957  | 3.624085  | -2.422986 |
| H | -2.460537 | -2.962719 | 2.540919  | H            | 1.548683  | 3.023022  | -0.723924 |
| H | -2.565220 | -4.816818 | 4.963546  | C            | 1.263709  | 5.664975  | 1.180986  |
| C | -2.515139 | -3.761758 | 4.649981  | O            | 0.242266  | 5.103945  | 0.382885  |
| O | 1.532706  | -1.354985 | 2.005266  | H            | 1.021485  | 5.603355  | 2.203888  |
| K | -3.389942 | -0.521538 | 0.237905  | H            | 1.344721  | 6.733630  | 0.873710  |
| O | -0.049906 | -2.336297 | 3.940107  | H            | 2.174613  | 5.084279  | 1.055050  |
| K | 0.814521  | -0.725890 | 5.824402  | H            | 1.115981  | -0.013067 | 6.269900  |
| O | 2.271563  | 2.823459  | 6.077986  | O            | -0.262481 | 2.787907  | 5.852346  |
| H | 2.669257  | 4.846791  | 6.147504  | O            | 1.333989  | 3.805146  | 4.586574  |
| H | 1.962016  | 4.759405  | 8.366364  | H            | -0.855615 | 1.608426  | 7.391261  |
| C | 1.354519  | 4.115392  | 7.733320  | C            | 1.009981  | 2.921923  | 5.331452  |
| O | 2.447769  | 0.900731  | 7.372443  | O            | 1.845070  | 1.928591  | 5.757555  |
| H | 1.014689  | 4.395344  | 5.590147  | C            | 1.107091  | 1.007776  | 6.629749  |
| C | 2.125503  | 2.080653  | 7.217042  | H            | 1.489415  | 1.035395  | 7.633691  |
| H | 0.296477  | 4.347201  | 7.861482  | H            | -0.899316 | 0.778428  | 5.784318  |
| C | 1.824206  | 4.151545  | 6.259922  | C            | -0.326984 | 1.449513  | 6.476258  |
| O | 1.584437  | 2.792641  | 8.188595  | H            | -2.412697 | -1.413638 | 7.568904  |
| H | 2.105992  | -0.998917 | 2.711489  | O            | -1.909094 | -3.885909 | 5.611767  |
| O | -1.164386 | -2.530478 | -1.519764 | O            | 0.331118  | -4.011813 | 5.686610  |
| H | 0.841562  | -2.462824 | -1.897300 | H            | -3.348364 | -2.462224 | 4.957139  |
| H | 0.796035  | -4.696240 | -0.490520 | C            | -0.691089 | -3.404555 | 5.927498  |
| C | 0.230652  | -3.816040 | -0.149881 | O            | -0.718984 | -2.195322 | 6.515829  |
| O | -3.116524 | -3.506584 | -0.956947 | C            | -2.092576 | -1.654312 | 6.535122  |
| H | 0.361787  | -1.637651 | -0.396955 | H            | -2.102878 | -0.692593 | 5.945908  |
| C | -1.918563 | -3.439898 | -0.808428 | H            | -3.710176 | -3.220118 | 6.477317  |
| H | 0.578390  | -3.558978 | 0.876999  | C            | -2.895411 | -2.797052 | 5.888025  |
| C | 0.182447  | -2.504556 | -1.018742 | O            | -1.816188 | -0.492876 | 1.116006  |
| O | -1.164092 | -4.221085 | 0.006009  | K            | -4.411010 | 0.981751  | 2.747231  |
| O | 0.035428  | 0.392097  | 3.460143  | O            | -0.939232 | -2.339383 | 3.238117  |
|   |           |           |           | K            | 1.806797  | -2.184544 | 3.585238  |



|              |           |           |           |                                    |           |           |           |
|--------------|-----------|-----------|-----------|------------------------------------|-----------|-----------|-----------|
| O            | 2.776656  | 0.749501  | 0.265537  | O                                  | 2.041600  | 4.080846  | 3.472007  |
| H            | 4.476974  | 1.887378  | 0.576497  | H                                  | -0.794912 | 2.046328  | 5.977802  |
| H            | 4.152741  | 1.870867  | 2.980040  | C                                  | 1.580995  | 3.406878  | 4.390921  |
| C            | 3.304741  | 1.510660  | 2.411741  | O                                  | 2.348466  | 2.801848  | 5.354651  |
| O            | 2.489996  | -1.430924 | 0.817407  | C                                  | 1.449860  | 1.995161  | 6.175269  |
| H            | 2.891998  | 2.830114  | 0.646889  | H                                  | 1.464714  | 2.421525  | 7.200208  |
| C            | 2.772011  | -0.286723 | 1.092766  | H                                  | 0.025181  | 1.020750  | 4.874012  |
| H            | 2.341545  | 1.876719  | 2.789723  | C                                  | 0.119538  | 1.940126  | 5.434911  |
| C            | 3.425642  | 1.910815  | 0.897551  | H                                  | -3.475247 | -0.430545 | 6.301067  |
| O            | 3.241642  | 0.052023  | 2.367167  | O                                  | -1.361489 | -2.875715 | 6.084885  |
| H            | -1.188660 | -0.590288 | 0.379049  | O                                  | 0.504831  | -1.824425 | 6.911609  |
| O            | -4.965508 | -2.292212 | 0.958658  | H                                  | -3.012377 | -3.009220 | 4.972847  |
| H            | -3.800228 | -3.627941 | -0.072090 | C                                  | -0.633857 | -1.776066 | 6.503864  |
| H            | -3.872249 | -4.866344 | 1.843450  | O                                  | -1.344443 | -0.633793 | 6.272717  |
| C            | -3.582160 | -3.825975 | 2.070587  | C                                  | -2.695104 | -0.946662 | 5.736348  |
| O            | -6.210348 | -1.658937 | 2.716858  | H                                  | -2.654400 | -0.617117 | 4.679467  |
| H            | -2.852246 | -2.257417 | 0.667471  | H                                  | -3.280059 | -2.891651 | 6.782158  |
| C            | -5.339144 | -2.353329 | 2.250482  | C                                  | -2.771918 | -2.488423 | 5.892601  |
| H            | -2.624152 | -3.770708 | 2.595234  | O                                  | 0.284919  | 0.697426  | 1.083555  |
| C            | -3.705117 | -2.969231 | 0.788868  | K                                  | -4.203169 | 1.330119  | 3.235192  |
| O            | -4.563422 | -3.222625 | 2.941371  | O                                  | -1.161358 | -1.663039 | 2.074875  |
| O            | 0.221641  | 0.122401  | 2.964561  | K                                  | 0.699230  | -3.200630 | 3.276387  |
| K            | -1.373853 | 2.681604  | 2.436546  | O                                  | 3.987293  | -2.194964 | 0.831262  |
| C            | -6.461688 | 4.276919  | 0.622356  | H                                  | 5.267508  | -0.541281 | 1.109209  |
| H            | -6.284552 | 3.558517  | -0.205084 | H                                  | 4.393162  | -0.424256 | 3.350096  |
| H            | -7.534071 | 4.331996  | 0.787223  | C                                  | 3.634644  | -0.724654 | 2.602263  |
| O            | -3.674437 | 3.799939  | 2.648215  | O                                  | 3.260193  | -4.140937 | 1.734073  |
| H            | -5.685124 | 6.085329  | -0.590133 | H                                  | 3.618306  | -0.207920 | 0.457946  |
| H            | -6.028525 | 6.358052  | 1.203279  | C                                  | 3.484949  | -2.963145 | 1.837158  |
| O            | -4.348169 | 5.234830  | 1.028352  | H                                  | 2.722936  | -0.103173 | 2.735663  |
| C            | -5.675836 | 5.587988  | 0.488494  | C                                  | 4.199343  | -0.811140 | 1.172594  |
| C            | -4.506473 | 4.122317  | 1.829478  | O                                  | 3.292096  | -2.179200 | 2.939711  |
| O            | -5.949115 | 3.748905  | 1.854795  | H                                  | 0.042258  | 0.336378  | 0.213046  |
| <b>III-A</b> |           |           |           | O                                  | -5.081914 | -1.003334 | 1.049746  |
| V            | -0.548155 | -0.182616 | 2.555755  | H                                  | -4.558599 | -1.193078 | -0.953723 |
| O            | -1.725848 | 0.838869  | -2.296746 | H                                  | -4.424366 | -3.532551 | -0.317984 |
| O            | -2.040553 | 3.097978  | -2.226179 | C                                  | -3.828067 | -2.830136 | 0.307233  |
| O            | -1.820162 | 0.721287  | 3.240352  | O                                  | -5.364860 | -1.645279 | 3.208052  |
| O            | -3.708612 | 1.653401  | -1.632579 | H                                  | -3.244689 | -0.704714 | 0.115900  |
| C            | -4.576762 | 2.835479  | -0.996517 | C                                  | -4.928389 | -1.888981 | 2.108373  |
| C            | -5.280074 | 2.166135  | 0.265368  | H                                  | -2.739327 | -2.970577 | 0.268122  |
| O            | -6.085588 | 2.954441  | 1.300390  | C                                  | -4.121391 | -1.346977 | 0.044595  |
| C            | -2.429952 | 1.830972  | -2.105486 | O                                  | -4.291956 | -3.012696 | 1.659803  |
| H            | -3.877037 | 3.682269  | -0.761062 | O                                  | 0.616575  | -0.324324 | 3.744196  |
| H            | -4.536942 | 1.506159  | 0.695278  | K                                  | -0.488188 | 3.024562  | 2.073136  |
| H            | -5.298358 | 2.997687  | -1.796736 | C                                  | -5.399463 | 4.970993  | 4.097911  |
| H            | -6.047897 | 1.507641  | -0.091188 | H                                  | -6.350199 | 5.513876  | 3.953707  |
| C            | -0.427888 | 4.809640  | -2.320745 | H                                  | -4.979982 | 4.964694  | 5.107728  |
| C            | -0.638807 | 3.265353  | -2.025404 | O                                  | -3.892149 | 3.437978  | 1.783197  |
| H            | -0.075758 | 5.037613  | -3.348279 | H                                  | -4.453671 | 6.737333  | 3.197570  |
| H            | -1.335873 | 5.333606  | -2.174518 | H                                  | -3.613690 | 5.273300  | 3.129388  |
| H            | -0.128883 | 2.545566  | -2.663935 | O                                  | -5.222928 | 5.315971  | 1.865756  |
| H            | -0.440495 | 3.047782  | -0.977352 | C                                  | -4.587161 | 5.648939  | 3.075135  |
| C            | 0.751488  | 5.303060  | -0.192520 | C                                  | -5.081128 | 3.838849  | 2.076120  |
| O            | 0.722781  | 5.365707  | -1.655746 | O                                  | -5.345644 | 3.644650  | 3.587641  |
| H            | 1.525431  | 5.958413  | 0.133827  | <b>K<sub>3</sub>PO<sub>4</sub></b> |           |           |           |
| H            | 0.919242  | 4.301867  | 0.202090  | <b>TS1-B</b>                       |           |           |           |
| H            | -0.238772 | 5.599434  | 0.243571  | P                                  | -0.612481 | 1.262360  | 2.896079  |
| H            | 1.842990  | 0.956921  | 6.176497  | O                                  | 1.960673  | 2.779149  | -0.698334 |
| O            | 0.240509  | 3.045534  | 4.467025  | O                                  | 1.060937  | 1.292430  | -2.237675 |

|   |           |           |           |             |           |           |           |
|---|-----------|-----------|-----------|-------------|-----------|-----------|-----------|
| O | -1.501133 | 0.167770  | 2.249869  | O           | 3.072521  | -2.458639 | 3.084579  |
| O | 0.337463  | 3.378567  | -2.200622 | H           | 2.710727  | 1.076429  | 4.697619  |
| C | -0.083855 | 4.462004  | -1.309722 | C           | 2.947351  | -1.707891 | 4.078805  |
| C | -1.339705 | 3.854654  | -0.782942 | H           | 1.163651  | -0.331688 | 6.075467  |
| O | -0.828406 | 2.572946  | -0.337746 | C           | 3.174139  | 0.251661  | 5.299469  |
| C | 1.128330  | 2.459074  | -1.556913 | O           | 2.077911  | -1.864330 | 5.068986  |
| H | 0.728824  | 4.594177  | -0.587899 | O           | -1.044234 | 1.594906  | 4.307353  |
| H | -2.015987 | 3.744714  | -1.703211 | K           | -3.395026 | 0.954300  | 0.585726  |
| H | -0.064390 | 5.361712  | -1.959829 | C           | -4.549825 | 5.979996  | 1.554998  |
| H | -1.854259 | 4.414497  | 0.014036  | H           | -4.080269 | 6.673291  | 0.832667  |
| C | 1.824842  | -0.965384 | -2.220839 | H           | -5.243277 | 6.540612  | 2.239562  |
| C | 2.152181  | 0.460882  | -1.896561 | O           | -5.325461 | 2.858342  | 0.202958  |
| H | 1.643330  | -0.992754 | -3.323926 | H           | -2.506619 | 5.348428  | 1.949470  |
| H | 2.652008  | -1.581840 | -1.941474 | H           | -3.674677 | 4.843290  | 3.249905  |
| H | 2.256915  | 0.663375  | -0.796810 | O           | -3.886562 | 3.685118  | 1.752175  |
| H | 3.076765  | 0.792896  | -2.438710 | C           | -3.531727 | 5.011244  | 2.179103  |
| C | -0.523628 | -1.132945 | -2.166760 | C           | -4.960584 | 3.803982  | 0.917913  |
| O | 0.712187  | -1.437181 | -1.465700 | O           | -5.230979 | 5.104613  | 0.650822  |
| H | -1.272823 | -1.955937 | -1.966587 | <b>II-B</b> |           |           |           |
| H | -0.304471 | -0.915493 | -3.207532 | P           | -0.596159 | 0.469003  | 3.703741  |
| H | -0.956458 | -0.246983 | -1.746275 | O           | 0.948074  | 3.302294  | -3.029072 |
| H | -1.971803 | -2.474140 | 5.434803  | O           | 0.841472  | 1.950637  | -1.171660 |
| O | -4.232300 | -0.336146 | 5.986706  | O           | -1.108961 | -0.444924 | 2.571345  |
| O | -5.941563 | -1.429197 | 4.823668  | O           | -0.590512 | 3.713299  | -1.444468 |
| H | -2.165900 | 0.269445  | 6.158007  | C           | -1.573677 | 3.051509  | -0.659253 |
| C | -4.800928 | -1.284576 | 5.170506  | C           | -1.861670 | 3.701169  | 0.699472  |
| O | -3.808001 | -2.085875 | 4.651151  | O           | -2.298019 | 2.665146  | 1.569633  |
| C | -2.525161 | -1.605776 | 5.076824  | C           | 0.479090  | 3.021052  | -1.955810 |
| H | -1.943492 | -1.062662 | 4.255324  | H           | -2.548058 | 3.163773  | -1.204863 |
| H | -2.900266 | -1.135691 | 7.243742  | H           | -2.736756 | 4.469932  | 0.592313  |
| C | -2.859153 | -0.624704 | 6.236141  | H           | -1.414255 | 1.966446  | -0.425311 |
| H | -5.757714 | -4.543615 | 2.140021  | H           | -1.025140 | 4.240872  | 1.200250  |
| O | -3.650985 | -2.237117 | 1.306030  | C           | 1.172267  | 0.147760  | -2.717548 |
| O | -1.810770 | -3.611684 | 0.772356  | C           | 1.790414  | 1.170967  | -1.796014 |
| H | -5.443175 | -1.767271 | 2.161712  | H           | 0.303963  | 0.613496  | -3.279332 |
| C | -2.946861 | -3.421237 | 1.204617  | H           | 1.926489  | -0.059075 | -3.505447 |
| O | -3.694011 | -4.439281 | 1.723532  | H           | 2.348017  | 0.510584  | -1.101723 |
| C | -4.911191 | -3.917901 | 2.350153  | H           | 2.684917  | 1.719402  | -1.287722 |
| H | -4.768056 | -3.845156 | 3.467335  | C           | 0.350409  | -2.046579 | -2.923678 |
| H | -5.604683 | -2.803705 | 0.708767  | O           | 0.818023  | -1.029917 | -1.989588 |
| C | -5.039118 | -2.607893 | 1.601943  | H           | 0.666261  | -1.722010 | -3.981597 |
| O | -1.066424 | 2.651250  | 2.064638  | H           | -0.757152 | -2.076019 | -2.930101 |
| K | 0.464215  | -1.549730 | 1.454944  | H           | 0.999354  | -2.946883 | -2.715567 |
| O | 0.860382  | 0.858384  | 2.838541  | H           | -4.808168 | 0.587249  | 7.205387  |
| K | -0.770306 | 3.924021  | 4.634777  | O           | -4.203095 | 0.338046  | 4.029166  |
| O | 3.632348  | 3.419498  | 3.877938  | O           | -6.013622 | -0.975426 | 3.424387  |
| H | 4.605548  | 3.788339  | 2.088913  | H           | -2.762684 | 1.293443  | 5.376436  |
| H | 2.664489  | 4.994028  | 1.574345  | C           | -5.313225 | -0.492572 | 4.281149  |
| C | 2.386636  | 4.017172  | 1.954098  | O           | -5.520464 | -0.567544 | 5.600650  |
| O | 2.169141  | 4.297396  | 5.379135  | C           | -4.427122 | 0.133822  | 6.289165  |
| H | 3.686020  | 2.239003  | 2.184700  | H           | -3.672827 | -0.700995 | 6.511262  |
| C | 2.492408  | 4.031397  | 4.210390  | H           | -4.370998 | 2.059872  | 5.164145  |
| H | 1.703241  | 3.416491  | 1.324866  | C           | -3.865895 | 1.077654  | 5.284702  |
| C | 3.700134  | 3.290429  | 2.437700  | H           | -1.324582 | -4.790442 | 3.389895  |
| O | 1.666351  | 4.241583  | 3.181950  | O           | -3.102522 | -2.877068 | 1.902188  |
| H | -0.846791 | 2.454095  | 0.883763  | O           | -1.813165 | -2.691529 | 0.005181  |
| O | 3.792533  | -0.601952 | 4.255889  | H           | -2.761495 | -2.173518 | 3.810401  |
| H | 3.980495  | 0.709009  | 5.877898  | C           | -1.927256 | -2.925613 | 1.176404  |
| H | 2.517225  | -1.154965 | 6.935450  | O           | -0.879196 | -3.427913 | 1.902758  |
| C | 2.200966  | -0.711976 | 5.986231  | C           | -1.358379 | -3.727602 | 3.243647  |

|              |           |           |           |   |           |           |           |
|--------------|-----------|-----------|-----------|---|-----------|-----------|-----------|
| H            | -0.679162 | -3.172337 | 3.937418  | C | 3.637051  | -0.786489 | -2.603301 |
| H            | -3.514740 | -3.804654 | 3.717903  | O | 2.995156  | 0.478813  | -2.878916 |
| C            | -2.772835 | -3.142911 | 3.302830  | H | 3.318800  | -1.702879 | -3.227197 |
| O            | -1.289995 | 1.857067  | 3.647020  | H | 3.487125  | -1.075084 | -1.542796 |
| K            | 1.106050  | -0.322025 | 1.110981  | H | 4.739932  | -0.693839 | -2.756655 |
| O            | 0.927286  | 0.742050  | 3.348581  | H | -3.674187 | -1.271449 | 6.905795  |
| K            | 0.704821  | 2.998392  | 4.929593  | O | -5.012505 | 0.232514  | 4.715365  |
| O            | 4.018571  | 3.988951  | 3.276913  | O | -5.680465 | -1.330779 | 3.225245  |
| H            | 4.721961  | 3.955012  | 1.316243  | H | -3.283837 | 1.110628  | 5.191251  |
| H            | 2.542644  | 4.878645  | 0.695513  | C | -5.031678 | -1.042820 | 4.206523  |
| C            | 2.497393  | 4.119076  | 1.480189  | O | -4.182317 | -1.831188 | 4.968007  |
| O            | 2.720914  | 4.889128  | 4.870406  | C | -3.376881 | -0.982947 | 5.889163  |
| H            | 3.924978  | 2.479811  | 1.819851  | H | -2.346596 | -1.028818 | 5.639162  |
| C            | 2.916695  | 4.513572  | 3.727422  | H | -4.350210 | 0.876042  | 6.581606  |
| H            | 1.759096  | 3.360808  | 1.128743  | C | -3.933565 | 0.430676  | 5.676725  |
| C            | 3.868133  | 3.572076  | 1.899352  | H | -1.014944 | -5.179532 | 3.035839  |
| O            | 2.049430  | 4.799711  | 2.699144  | O | -3.160346 | -3.236781 | 2.314660  |
| H            | -1.783116 | 2.395522  | 2.452262  | O | -2.303440 | -2.174079 | 0.461503  |
| O            | 3.297888  | -0.606180 | 4.706388  | H | -2.423043 | -2.687510 | 4.140508  |
| H            | 2.688060  | -1.389091 | 6.547552  | C | -2.216079 | -2.961250 | 1.394209  |
| H            | 2.013832  | -3.463236 | 5.369995  | O | -1.019427 | -3.607429 | 1.735553  |
| C            | 1.862594  | -2.504324 | 4.824069  | C | -1.122356 | -4.081321 | 3.100989  |
| O            | 3.887283  | -0.905247 | 2.510204  | H | -0.320083 | -3.600752 | 3.612410  |
| H            | 1.522192  | -0.435038 | 5.617368  | H | -3.102120 | -4.390347 | 4.006133  |
| C            | 3.336657  | -1.279442 | 3.516119  | C | -2.496121 | -3.616842 | 3.554312  |
| H            | 0.800987  | -2.399984 | 4.588249  | O | -2.354681 | 1.963891  | 3.541426  |
| C            | 2.316785  | -1.194865 | 5.544117  | K | 0.339170  | -1.223682 | 1.556500  |
| O            | 2.669241  | -2.518787 | 3.574322  | O | -0.114244 | 1.242019  | 2.507483  |
| O            | -0.817705 | -0.190437 | 5.106748  | K | -0.166029 | 3.979282  | 4.384893  |
| K            | -3.656581 | 0.379982  | 1.424269  | O | 4.364577  | 3.095528  | 2.355814  |
| C            | -5.304022 | 4.860229  | 1.833534  | H | 4.549657  | 3.194442  | 0.298391  |
| H            | -4.335035 | 5.315758  | 1.972731  | H | 2.179141  | 2.881041  | 0.226057  |
| H            | -6.167167 | 5.351951  | 2.363202  | C | 2.676464  | 2.219523  | 0.973873  |
| O            | -5.818482 | 2.788095  | -0.952486 | O | 3.059929  | 3.600127  | 4.095673  |
| H            | -4.178135 | 3.011485  | 2.345294  | H | 4.827932  | 1.557401  | 0.944654  |
| H            | -5.755464 | 3.204697  | 3.224876  | C | 3.213412  | 3.188414  | 2.988743  |
| O            | -5.972333 | 2.619813  | 1.357380  | H | 2.361242  | 1.203882  | 0.802754  |
| C            | -5.179480 | 3.406829  | 2.302280  | C | 4.192924  | 2.451307  | 1.019762  |
| C            | -5.834321 | 3.271774  | 0.180320  | O | 2.245291  | 2.635126  | 2.234355  |
| O            | -5.561252 | 4.599633  | 0.373035  | H | -2.823740 | 2.376324  | 2.464970  |
| <b>TS2-B</b> |           |           |           | O | 3.394587  | 0.641037  | 4.651709  |
| P            | -1.113936 | 0.882615  | 3.606076  | H | 2.703624  | 0.452619  | 6.614613  |
| O            | 1.386307  | 4.303957  | -1.950272 | H | 2.101437  | -1.872772 | 5.767356  |
| O            | 0.592214  | 2.143446  | -1.836665 | C | 1.765934  | -1.011497 | 5.154265  |
| O            | -1.747122 | -0.544291 | 3.275149  | O | 4.016171  | -0.202325 | 2.658624  |
| O            | -0.234570 | 3.840864  | -0.502694 | H | 1.366956  | 1.044493  | 5.516344  |
| C            | -1.343074 | 3.032099  | -0.157140 | C | 3.332726  | -0.262845 | 3.668650  |
| C            | -2.273349 | 3.601793  | 0.925618  | H | 0.634113  | -0.945228 | 5.021008  |
| O            | -3.120081 | 2.561881  | 1.267420  | C | 2.247973  | 0.403116  | 5.604852  |
| C            | 0.612191  | 3.449492  | -1.527256 | O | 2.425874  | -1.244893 | 3.880752  |
| H            | -1.973534 | 2.852503  | -1.018002 | O | -0.622289 | 1.008625  | 5.052555  |
| H            | -2.898645 | 4.377773  | 0.490014  | K | -4.147799 | 0.242036  | 1.470978  |
| H            | -1.011901 | 2.071497  | 0.253538  | C | -5.241351 | 4.766429  | 2.093347  |
| H            | -1.722456 | 3.968796  | 1.780281  | H | -4.386617 | 5.508328  | 2.085394  |
| C            | 1.688736  | 0.411625  | -3.263690 | H | -6.171317 | 5.294299  | 2.184770  |
| C            | 1.089782  | 1.857096  | -3.230058 | O | -5.492350 | 2.028887  | -0.090086 |
| H            | 1.018989  | -0.153439 | -2.515071 | H | -4.138863 | 3.154084  | 3.394659  |
| H            | 1.576796  | -0.110388 | -4.254317 | H | -5.792407 | 3.803956  | 3.838711  |
| H            | 1.828154  | 2.676711  | -3.478230 | O | -5.742467 | 2.525118  | 2.081454  |
| H            | 0.217603  | 1.864502  | -3.931306 | C | -5.127668 | 3.515369  | 2.986202  |

|              |           |           |           |                                      |           |           |           |
|--------------|-----------|-----------|-----------|--------------------------------------|-----------|-----------|-----------|
| C            | -5.487270 | 2.867958  | 0.810935  | O                                    | 3.048947  | 3.150501  | 3.745864  |
| O            | -5.233738 | 4.188628  | 0.700482  | H                                    | -3.030188 | 1.670802  | 4.193999  |
| <b>III-B</b> |           |           |           | O                                    | 0.076056  | -3.347268 | 1.453849  |
| P            | -1.124542 | 0.474454  | 2.810330  | H                                    | -1.153287 | -2.495336 | 2.901085  |
| O            | 2.514398  | 3.303682  | 0.053565  | H                                    | 0.621119  | -1.623819 | 4.076385  |
| O            | 1.100304  | 3.608650  | -1.740935 | C                                    | 0.943604  | -2.490883 | 3.470747  |
| O            | -1.558189 | -0.403803 | 1.586328  | O                                    | 1.452651  | -2.208593 | 0.041003  |
| O            | 0.326969  | 3.991118  | 0.252697  | H                                    | -0.506417 | -4.166177 | 3.276218  |
| C            | 0.478638  | 4.105108  | 1.720751  | C                                    | 1.089222  | -2.487053 | 1.173595  |
| C            | -0.421191 | 5.212913  | 2.210146  | H                                    | 1.628188  | -3.171771 | 3.993984  |
| O            | -1.831376 | 4.835227  | 2.262547  | C                                    | -0.287051 | -3.174109 | 2.862186  |
| C            | 1.423890  | 3.609987  | -0.415335 | O                                    | 1.649371  | -1.978851 | 2.292645  |
| H            | 0.242905  | 3.110382  | 2.156554  | O                                    | -1.017233 | -0.333508 | 4.133296  |
| H            | -0.387156 | 6.083324  | 1.540634  | K                                    | -3.871777 | 1.002653  | 1.182957  |
| H            | 1.526329  | 4.355416  | 1.943231  | C                                    | -4.335812 | 4.117699  | 4.663163  |
| H            | -0.094510 | 5.504905  | 3.219695  | H                                    | -3.715256 | 4.482832  | 5.492956  |
| C            | 1.953393  | 1.808013  | -3.166996 | H                                    | -5.250949 | 4.724046  | 4.582800  |
| C            | 2.167302  | 3.228087  | -2.653219 | O                                    | -1.629324 | 4.523406  | 4.529783  |
| H            | 0.932270  | 1.709319  | -3.566594 | H                                    | -5.384069 | 2.580005  | 5.695483  |
| H            | 2.666063  | 1.619740  | -3.993496 | H                                    | -5.253141 | 2.301378  | 3.955541  |
| H            | 3.136648  | 3.347940  | -2.150317 | O                                    | -3.571703 | 1.809915  | 5.105834  |
| H            | 2.104058  | 3.937088  | -3.493031 | C                                    | -4.683396 | 2.643465  | 4.842111  |
| C            | 3.422980  | 0.529968  | -1.750984 | C                                    | -2.295589 | 4.543427  | 3.499375  |
| O            | 2.070041  | 0.794331  | -2.163706 | O                                    | -3.626563 | 4.356204  | 3.401543  |
| H            | 3.848157  | 1.377267  | -1.186281 | <b>Na<sub>2</sub>SnO<sub>3</sub></b> |           |           |           |
| H            | 4.061789  | 0.303885  | -2.622376 | <b>TS1-C</b>                         |           |           |           |
| H            | 3.376505  | -0.356667 | -1.101056 | Sn                                   | -0.680208 | -1.759999 | 3.992083  |
| H            | -3.860727 | -2.754863 | 4.284209  | O                                    | -2.062509 | 2.167978  | 2.532948  |
| O            | -5.857433 | -0.596811 | 4.877001  | O                                    | -1.298568 | 3.558902  | 0.748585  |
| O            | -6.301663 | 0.129202  | 2.756494  | O                                    | -0.956253 | -3.631027 | 4.002233  |
| H            | -4.170221 | -0.250206 | 6.023228  | O                                    | -3.105644 | 1.676391  | 0.017756  |
| C            | -5.600175 | -0.471234 | 3.552791  | C                                    | -2.254529 | 1.366925  | -1.069847 |
| O            | -4.443654 | -1.088040 | 3.198986  | C                                    | -0.718170 | 1.213517  | -0.456288 |
| C            | -3.801606 | -1.661708 | 4.383031  | O                                    | -0.735379 | 1.213880  | 0.933995  |
| H            | -2.751480 | -1.294772 | 4.394864  | C                                    | -1.594145 | 2.171438  | 1.382926  |
| H            | -4.972602 | -1.869099 | 6.262733  | H                                    | -2.565319 | 0.383662  | -1.513013 |
| C            | -4.655187 | -1.109220 | 5.537077  | H                                    | -0.074287 | 2.020239  | -0.858658 |
| H            | -1.915854 | -3.151314 | -2.270751 | H                                    | -2.180685 | 2.138122  | -1.869229 |
| O            | -3.462699 | -1.335669 | -0.701505 | H                                    | -0.333625 | 0.239995  | -0.728864 |
| O            | -2.768274 | 0.666626  | -1.542661 | C                                    | 0.920308  | 4.318643  | 1.440256  |
| H            | -2.322804 | -2.340007 | 0.700932  | C                                    | -0.624444 | 4.426878  | 1.640941  |
| C            | -2.586111 | -0.519911 | -1.343903 | H                                    | 1.260005  | 3.859794  | 0.480272  |
| O            | -1.466821 | -1.192241 | -1.731085 | H                                    | 1.269482  | 5.362203  | 1.343123  |
| C            | -1.623983 | -2.602495 | -1.363391 | H                                    | -0.808693 | 4.294154  | 2.779046  |
| H            | -0.658289 | -2.955333 | -0.978740 | H                                    | -0.971062 | 5.454185  | 1.395485  |
| H            | -3.422261 | -3.386010 | -0.325339 | C                                    | 3.015884  | 3.526125  | 2.242055  |
| C            | -2.724457 | -2.540309 | -0.304912 | O                                    | 1.589979  | 3.720507  | 2.616669  |
| O            | -2.218764 | 1.614058  | 3.016543  | H                                    | 3.692914  | 3.077119  | 3.077352  |
| K            | 0.309573  | 0.520185  | -0.016616 | H                                    | 3.510098  | 4.458709  | 1.976620  |
| O            | 0.230724  | 1.185120  | 2.488430  | H                                    | 2.986481  | 2.934628  | 1.323949  |
| K            | -0.729135 | 2.042540  | 5.422747  | H                                    | -3.519665 | 4.847389  | 4.830142  |
| O            | 2.392717  | 1.407861  | 5.011137  | O                                    | -3.009622 | 1.838684  | 5.935407  |
| H            | 3.544089  | -0.030201 | 4.040585  | O                                    | -0.775066 | 1.834844  | 5.979796  |
| H            | 4.693776  | 1.985874  | 3.243007  | H                                    | -4.857641 | 2.328217  | 5.003663  |
| C            | 3.605741  | 1.974004  | 3.083552  | C                                    | -1.805031 | 2.403251  | 5.721720  |
| O            | 1.785842  | 3.516384  | 5.606434  | O                                    | -1.873776 | 3.670024  | 5.234345  |
| H            | 1.990785  | 0.488187  | 3.202701  | C                                    | -3.223361 | 3.788660  | 4.617211  |
| C            | 2.364868  | 2.757100  | 4.851768  | H                                    | -3.271209 | 3.475705  | 3.577788  |
| H            | 3.369080  | 2.061865  | 2.013559  | H                                    | -4.445758 | 3.195665  | 6.455023  |
| C            | 2.885037  | 0.803096  | 3.768800  | C                                    | -4.009071 | 2.809205  | 5.529688  |

|             |           |           |           |    |           |           |           |
|-------------|-----------|-----------|-----------|----|-----------|-----------|-----------|
| H           | -2.712374 | -4.816126 | 0.107089  | C  | -0.060717 | 3.166191  | 0.357518  |
| O           | -4.293437 | -3.148276 | 2.164652  | H  | 0.115961  | 4.775100  | -1.046799 |
| O           | -4.753719 | -1.388456 | 0.842814  | H  | 0.289449  | 5.111339  | 0.658499  |
| H           | -2.705838 | -4.079695 | 3.058757  | H  | 0.379394  | 2.864567  | 1.372420  |
| C           | -4.124930 | -2.398681 | 1.034716  | H  | -1.114966 | 3.182149  | 0.340417  |
| O           | -3.090553 | -2.815902 | 0.244206  | C  | 2.780970  | 3.322927  | -0.658569 |
| C           | -2.549789 | -4.046974 | 0.817230  | O  | 2.009023  | 4.521790  | -0.346807 |
| H           | -1.491889 | -3.786869 | 1.095787  | H  | 2.501368  | 2.502891  | 0.010684  |
| H           | -3.813920 | -5.193167 | 2.232790  | H  | 3.821142  | 3.487230  | -0.357190 |
| C           | -3.312993 | -4.227658 | 2.152810  | H  | 2.778088  | 2.915147  | -1.690292 |
| O           | -2.348803 | -0.646442 | 3.423749  | H  | -2.707543 | 2.622595  | 4.611177  |
| O           | 0.634611  | -0.502893 | 4.115923  | O  | -0.376620 | 4.038111  | 4.507014  |
| Na          | 0.891398  | 1.640957  | 4.358917  | O  | 0.464021  | 3.188348  | 6.443923  |
| O           | 3.162505  | 5.226231  | 4.948882  | H  | -1.804573 | 5.568531  | 4.189609  |
| H           | 2.745025  | 7.283638  | 5.377414  | C  | -0.500628 | 3.554430  | 5.796045  |
| H           | 0.735504  | 6.416607  | 6.378028  | O  | -1.790563 | 3.600689  | 6.180218  |
| C           | 0.932872  | 5.914049  | 5.426133  | C  | -2.613971 | 3.650723  | 4.960784  |
| O           | 2.879813  | 3.026577  | 5.532655  | H  | -3.611758 | 4.083244  | 5.181505  |
| H           | 2.231618  | 6.609805  | 3.739177  | H  | -1.909107 | 4.117081  | 3.065177  |
| C           | 2.393958  | 4.174813  | 5.424898  | C  | -1.706182 | 4.456493  | 4.086874  |
| H           | 0.043355  | 6.079022  | 4.867167  | H  | -4.432069 | -1.147158 | 5.432374  |
| C           | 2.298194  | 6.409627  | 4.788497  | O  | -6.223196 | -2.533027 | 3.806412  |
| O           | 1.143307  | 4.480861  | 5.756487  | O  | -6.308393 | -0.986447 | 2.082893  |
| H           | -1.998482 | 0.265979  | 3.623952  | H  | -7.349839 | -2.393503 | 5.592321  |
| O           | 1.631328  | -4.677629 | 1.693970  | C  | -6.143106 | -1.274566 | 3.281850  |
| H           | 2.862047  | -5.885015 | 2.755552  | O  | -6.007454 | -0.341477 | 4.272870  |
| H           | 1.106757  | -6.882998 | 4.109643  | C  | -5.546486 | -1.043277 | 5.496287  |
| C           | 0.829663  | -6.010333 | 3.494204  | H  | -5.942598 | -0.523919 | 6.383725  |
| O           | 0.378354  | -5.586348 | -0.011630 | H  | -5.802706 | -3.213666 | 5.713199  |
| H           | 2.490031  | -4.334001 | 3.538245  | C  | -6.290547 | -2.391042 | 5.262302  |
| C           | 0.704834  | -5.565475 | 1.176528  | O  | -2.882304 | -1.098290 | 3.475391  |
| H           | 0.046469  | -5.334705 | 3.922037  | O  | -1.172299 | 1.305789  | 3.651099  |
| C           | 2.081713  | -5.209613 | 2.986589  | Na | 0.891218  | 1.641044  | 4.360996  |
| O           | 0.265918  | -6.387656 | 2.170540  | O  | 3.938023  | 0.271197  | 2.298563  |
| Na          | -3.798842 | 0.516560  | 2.109579  | H  | 3.637706  | -1.256617 | 0.993928  |
| C           | -5.380110 | 3.928149  | -1.044802 | H  | 1.883468  | -1.992700 | 2.771559  |
| H           | -5.273939 | 3.401195  | -2.054530 | C  | 2.918369  | -1.689492 | 3.137582  |
| H           | -6.293268 | 4.600319  | -1.126849 | O  | 3.057522  | 1.714701  | 3.811096  |
| O           | -5.612538 | 3.355949  | 2.329646  | H  | 4.921283  | -1.506906 | 2.175307  |
| H           | -3.341122 | 4.213995  | -0.498573 | C  | 3.222141  | 0.540085  | 3.412626  |
| H           | -4.204775 | 5.809031  | -0.954152 | H  | 3.410328  | -2.432053 | 3.775737  |
| O           | -4.885591 | 4.954672  | 0.833773  | C  | 3.918717  | -1.161902 | 2.066648  |
| C           | -4.265737 | 4.796282  | -0.515784 | O  | 2.725663  | -0.557531 | 4.009812  |
| C           | -5.356284 | 3.750681  | 1.181029  | H  | -2.757787 | -2.066811 | 3.584679  |
| O           | -5.611207 | 2.994314  | 0.033101  | O  | -0.635490 | -3.959151 | 6.343806  |
| <b>II-C</b> |           |           |           | H  | 0.889903  | -2.876712 | 6.942081  |
| Sn          | -1.070642 | -0.416693 | 2.697348  | H  | -0.572446 | -1.039574 | 7.066151  |
| O           | 0.854488  | 0.863597  | 1.067498  | C  | -0.683021 | -1.640397 | 6.143708  |
| O           | 0.172838  | 2.194988  | -0.647092 | O  | -2.916961 | -4.249213 | 6.389430  |
| O           | 0.273081  | -1.867004 | 2.993351  | H  | 0.759616  | -3.043315 | 5.133996  |
| O           | -1.825174 | 0.026577  | 0.886536  | C  | -1.927483 | -3.554655 | 6.364057  |
| C           | -1.771774 | -1.002504 | -0.077979 | H  | -0.683614 | -1.073168 | 5.194397  |
| C           | -0.270693 | -1.293939 | -0.612618 | C  | 0.254348  | -2.876701 | 6.100821  |
| O           | 0.209131  | 0.085760  | -1.027215 | O  | -2.035736 | -2.179465 | 6.311720  |
| C           | 0.419677  | 1.005311  | -0.070546 | Na | -3.798651 | 0.515714  | 2.109082  |
| H           | -2.039737 | -1.992008 | 0.327084  | C  | -4.400812 | 4.658786  | -1.288537 |
| H           | -0.336099 | -1.800937 | -1.570415 | H  | -5.326901 | 4.514629  | -1.921172 |
| H           | -2.389032 | -0.752995 | -0.928823 | H  | -3.959667 | 5.740287  | -1.222914 |
| H           | 0.510901  | -1.780745 | 0.031680  | O  | -3.989516 | 2.812881  | 1.756562  |
| C           | 0.607869  | 4.419943  | -0.148309 | H  | -3.531742 | 3.149778  | -2.429590 |

|              |           |           |           |              |           |           |           |
|--------------|-----------|-----------|-----------|--------------|-----------|-----------|-----------|
| H            | -2.291474 | 4.063384  | -1.824579 | H            | 2.354837  | -3.376580 | 5.309526  |
| O            | -3.240196 | 2.765719  | -0.413782 | C            | 3.415683  | -2.632533 | 3.559983  |
| C            | -3.316150 | 3.660405  | -1.523645 | O            | 2.075297  | -1.361873 | 5.042391  |
| C            | -3.975421 | 3.192005  | 0.567895  | H            | -2.240000 | -2.061194 | 2.187648  |
| O            | -4.745183 | 4.322911  | 0.208572  | O            | -1.299652 | -2.174034 | 7.617062  |
| <b>TS2-C</b> |           |           |           | H            | -0.526666 | -0.404718 | 6.854255  |
| Sn           | -0.803910 | -0.102589 | 1.993653  | H            | -2.140268 | -0.297654 | 5.236510  |
| O            | 1.655232  | 0.234798  | -0.172744 | C            | -1.951555 | -1.322851 | 5.497698  |
| O            | 1.522552  | 2.465731  | -0.705273 | O            | -3.396921 | -2.719985 | 8.312404  |
| O            | 0.537353  | -1.472634 | 2.092548  | H            | 0.127956  | -1.865138 | 6.106495  |
| O            | -1.302112 | 0.821300  | -0.011800 | C            | -2.645455 | -2.254499 | 7.475541  |
| C            | -1.352957 | -0.284273 | -0.943952 | H            | -1.748486 | -1.933977 | 4.588465  |
| C            | -0.362944 | -0.145887 | -2.061947 | C            | -0.763079 | -1.410278 | 6.466588  |
| O            | 0.359097  | 1.143590  | -2.027100 | O            | -3.090383 | -1.732290 | 6.274422  |
| C            | 1.140956  | 1.152444  | -0.827897 | Na           | -3.797699 | 0.516353  | 2.110429  |
| H            | -1.384156 | -1.218426 | -0.447512 | C            | -3.612186 | 2.575463  | -2.346855 |
| H            | -0.730120 | -0.304818 | -3.057030 | H            | -4.235083 | 3.404008  | -2.677507 |
| H            | -2.361713 | -0.175442 | -1.319698 | H            | -3.038987 | 2.141288  | -3.235865 |
| H            | 0.426549  | -0.889828 | -1.928144 | O            | -2.679914 | 2.609843  | 1.059223  |
| C            | 2.454398  | 4.481138  | 0.366340  | H            | -5.397852 | 1.188250  | -1.829991 |
| C            | 2.212656  | 2.999078  | 0.481563  | H            | -4.096474 | 0.378107  | -2.212531 |
| H            | 2.844052  | 4.885311  | -0.579410 | O            | -4.013387 | 1.345373  | -0.350173 |
| H            | 1.505481  | 5.078338  | 0.410712  | C            | -4.295578 | 1.298675  | -1.710845 |
| H            | 3.127576  | 2.505589  | 0.682982  | C            | -2.857741 | 2.254174  | -0.035340 |
| H            | 1.646362  | 2.814783  | 1.432964  | O            | -2.588803 | 2.946429  | -1.267299 |
| C            | 4.743182  | 4.662601  | 1.319061  | <b>III-C</b> |           |           |           |
| O            | 3.346757  | 4.896142  | 1.499731  | Sn           | -2.091919 | 0.122449  | 5.199480  |
| H            | 4.925886  | 3.574918  | 1.570059  | O            | 0.202028  | -0.715019 | 3.660405  |
| H            | 5.279690  | 5.271508  | 2.098094  | O            | 0.593699  | -0.847582 | 1.369387  |
| H            | 4.999980  | 4.796019  | 0.258549  | O            | -0.710366 | 1.206357  | 5.901323  |
| H            | -4.385231 | 2.589181  | 4.145037  | O            | -2.023299 | -1.060220 | 1.372133  |
| O            | -1.645050 | 3.613902  | 4.725681  | C            | -2.674163 | -2.319693 | 1.893811  |
| O            | -1.041288 | 2.476329  | 6.607931  | C            | -1.577766 | -2.937878 | 2.880269  |
| H            | -2.851248 | 5.282711  | 4.489558  | O            | -0.201614 | -2.702850 | 2.581526  |
| C            | -1.891038 | 2.914934  | 5.846406  | C            | 0.142978  | -1.396201 | 2.620106  |
| O            | -3.240858 | 2.745722  | 5.999157  | H            | -3.682704 | -2.284935 | 2.315868  |
| C            | -3.985579 | 3.347335  | 4.865969  | H            | -1.582847 | -4.020460 | 2.846832  |
| H            | -4.883746 | 3.867581  | 5.308232  | H            | -2.713163 | -3.120170 | 1.186638  |
| H            | -2.748924 | 4.112992  | 3.092500  | H            | -1.901186 | -2.492924 | 3.868770  |
| C            | -2.854757 | 4.233826  | 4.202785  | C            | 2.856390  | -1.360711 | 0.298771  |
| H            | -6.278838 | -0.970325 | 6.946180  | C            | 1.840117  | -0.382017 | 0.972903  |
| O            | -6.032391 | -1.638576 | 3.904869  | H            | 2.284348  | -2.032099 | -0.306986 |
| O            | -6.191148 | 0.468778  | 3.069302  | H            | 3.499340  | -0.744758 | -0.362341 |
| H            | -7.217773 | -3.039131 | 4.873294  | H            | 2.300673  | 0.269722  | 1.765275  |
| C            | -6.427678 | -0.344501 | 3.980611  | H            | 1.582976  | 0.341030  | 0.127338  |
| O            | -6.971121 | -0.073450 | 5.166591  | C            | 4.712349  | -2.870324 | 0.771482  |
| C            | -6.892921 | -1.237798 | 6.055828  | O            | 3.602324  | -2.066203 | 1.309737  |
| H            | -7.902211 | -1.395634 | 6.424730  | H            | 5.354082  | -2.168625 | 0.214319  |
| H            | -5.489090 | -2.875883 | 5.409360  | H            | 4.390803  | -3.644654 | 0.044978  |
| C            | -6.375734 | -2.367663 | 5.114552  | H            | 5.223529  | -3.368957 | 1.610048  |
| O            | -2.502851 | -1.132521 | 2.223295  | H            | 0.951909  | 6.913846  | 2.035876  |
| O            | -0.962119 | 1.361966  | 3.370970  | O            | 0.092947  | 4.781239  | 3.524366  |
| Na           | 0.890157  | 1.641456  | 4.358850  | O            | 1.593553  | 3.246654  | 2.872672  |
| O            | 3.711119  | -1.225252 | 3.465542  | H            | -1.674944 | 5.278801  | 2.505505  |
| H            | 3.211231  | -2.989874 | 2.474648  | C            | 0.955867  | 4.272385  | 2.617237  |
| H            | 1.304346  | -3.036454 | 3.908070  | O            | 1.001910  | 4.948872  | 1.448616  |
| C            | 2.192100  | -2.687093 | 4.482727  | C            | 0.208031  | 6.154933  | 1.662033  |
| O            | 3.011662  | 0.643443  | 4.573693  | H            | -0.238307 | 6.405928  | 0.679408  |
| H            | 4.301822  | -3.141609 | 4.001933  | H            | -0.909319 | 6.602549  | 3.516019  |
| C            | 2.887962  | -0.564945 | 4.362160  | C            | -0.740377 | 5.781449  | 2.818458  |

|                             |           |           |           |   |           |           |           |
|-----------------------------|-----------|-----------|-----------|---|-----------|-----------|-----------|
| H                           | -4.377644 | 2.930480  | -2.617449 | C | 2.209137  | 0.416982  | 8.340556  |
| O                           | -3.386590 | 2.447314  | 0.448913  | C | 2.665740  | 1.392790  | 7.153779  |
| O                           | -1.255228 | 3.324382  | 0.209403  | H | 1.746491  | -0.546831 | 7.968243  |
| H                           | -5.155194 | 1.571386  | -0.113700 | H | 3.161153  | 0.102359  | 8.847036  |
| C                           | -2.320303 | 2.948254  | -0.265676 | H | 2.672766  | 2.466638  | 7.429011  |
| O                           | -2.597425 | 3.029748  | -1.594175 | H | 3.663161  | 1.015065  | 6.748033  |
| C                           | -3.909773 | 2.403736  | -1.807251 | C | 1.392158  | 0.761067  | 10.626069 |
| H                           | -3.694942 | 1.376554  | -2.109499 | O | 1.409912  | 1.177868  | 9.222358  |
| H                           | -5.130227 | 3.361590  | -0.198995 | H | 0.962773  | 1.702321  | 11.013429 |
| C                           | -4.573563 | 2.452544  | -0.401164 | H | 2.457231  | 0.507679  | 10.820077 |
| O                           | -1.886193 | -1.766024 | 6.089065  | H | 0.635301  | -0.083476 | 10.809560 |
| O                           | -3.763190 | 0.413567  | 4.266324  | H | -2.493006 | 4.986309  | 6.405595  |
| Na                          | 0.890916  | 1.640805  | 4.359665  | O | -3.286955 | 5.270680  | 3.339370  |
| O                           | 2.097472  | -0.512818 | 6.041231  | O | -1.201946 | 5.112175  | 2.472136  |
| H                           | 1.050225  | -2.162215 | 6.783137  | H | -4.557854 | 6.169816  | 4.765621  |
| H                           | 3.417599  | -3.023699 | 6.556060  | C | -1.914040 | 5.335330  | 3.427803  |
| C                           | 2.981303  | -2.655582 | 5.615952  | O | -1.489223 | 5.507038  | 4.707069  |
| O                           | 3.741259  | 0.656512  | 5.055523  | C | -2.661564 | 5.675917  | 5.576695  |
| H                           | 0.952345  | -1.902217 | 5.062333  | H | -2.669956 | 6.712089  | 6.000059  |
| C                           | 3.281515  | -0.401827 | 5.406392  | H | -4.259838 | 4.389411  | 4.955104  |
| H                           | 2.875722  | -3.498789 | 4.924251  | C | -3.823203 | 5.349866  | 4.678249  |
| C                           | 1.683046  | -1.920689 | 5.880380  | H | 2.336884  | -1.409842 | -2.197556 |
| O                           | 3.818762  | -1.628098 | 5.122561  | O | 4.587023  | -3.640509 | -1.612935 |
| H                           | -2.470655 | -2.366528 | 5.582949  | O | 3.394019  | -5.542512 | -1.768420 |
| O                           | -6.057727 | 1.693394  | 2.846599  | H | 4.865073  | -1.559991 | -1.479487 |
| H                           | -7.556841 | 0.218008  | 3.172567  | C | 3.504782  | -4.353843 | -1.929147 |
| H                           | -7.871363 | 1.209192  | 5.455808  | O | 2.425799  | -3.575600 | -2.192837 |
| C                           | -6.869337 | 1.366317  | 5.022504  | C | 2.861601  | -2.210868 | -1.696133 |
| O                           | -5.474667 | 3.850304  | 3.129519  | H | 2.893427  | -2.203859 | -0.613667 |
| H                           | -5.946032 | -0.199400 | 3.823382  | H | 4.531908  | -2.192472 | -3.181733 |
| C                           | -6.046094 | 2.868793  | 3.563273  | C | 4.268119  | -2.290976 | -2.071877 |
| H                           | -6.113811 | 1.045668  | 5.772896  | O | -0.370302 | -0.372290 | 0.610236  |
| C                           | -6.673951 | 0.651495  | 3.687430  | O | -1.716199 | -1.616561 | 2.706491  |
| O                           | -6.666456 | 2.759670  | 4.765865  | O | -3.631874 | 1.344128  | 8.185893  |
| Na                          | -3.796396 | 0.516444  | 2.109644  | H | -1.718545 | 1.018771  | 9.058108  |
| C                           | -0.886733 | -0.552548 | -1.240514 | H | -0.710775 | 1.042981  | 6.806962  |
| H                           | -0.575482 | -0.037541 | -2.217885 | C | -1.818970 | 0.943196  | 6.875807  |
| H                           | 0.015119  | -0.425334 | -0.557080 | O | -4.288389 | 3.370550  | 7.215985  |
| O                           | -3.959665 | -0.658462 | 0.215578  | H | -2.572453 | -0.450965 | 8.327790  |
| H                           | -1.246803 | -2.471739 | -2.285726 | C | -3.544096 | 2.399529  | 7.233870  |
| H                           | -0.595475 | -2.504077 | -0.608849 | H | -2.259837 | 0.196997  | 6.162055  |
| O                           | -2.612470 | -2.122165 | -0.815799 | C | -2.380115 | 0.619150  | 8.253684  |
| C                           | -1.288262 | -2.011167 | -1.278550 | O | -2.439719 | 2.241893  | 6.488579  |
| C                           | -2.772383 | -0.865938 | 0.031380  | H | 1.042970  | 1.553366  | 0.216617  |
| O                           | -1.973224 | 0.161811  | -0.703146 | O | -5.638069 | -2.826435 | 4.745308  |
| <b>VO(OiPr)<sub>3</sub></b> |           |           |           | H | -4.970385 | -2.911050 | 2.775316  |
| <b>TS-D</b>                 |           |           |           | H | -3.771267 | -0.875829 | 3.136410  |
| V                           | -1.828659 | -0.792162 | 1.059067  | C | -4.685500 | -0.961048 | 3.726033  |
| O                           | 3.100278  | 2.686821  | 4.799780  | O | -4.799748 | -2.476293 | 6.872354  |
| O                           | 1.777455  | 1.221244  | 5.956232  | H | -6.480795 | -2.012306 | 3.014827  |
| O                           | -2.633610 | -2.027471 | 0.028911  | C | -4.891288 | -2.150988 | 5.704906  |
| O                           | 1.208125  | 1.908193  | 3.920098  | H | -5.322392 | -0.061347 | 3.706981  |
| C                           | 1.704892  | 1.922567  | 2.575784  | C | -5.480175 | -2.226544 | 3.433151  |
| C                           | 0.698860  | 2.704345  | 1.770799  | O | -4.252819 | -1.123061 | 5.129932  |
| O                           | 1.189409  | 2.534306  | 0.403895  | O | -2.960106 | 0.525179  | 1.343452  |
| C                           | 2.117706  | 1.987936  | 4.913975  | C | 2.678745  | 1.779142  | -2.068662 |
| H                           | 2.713971  | 2.288294  | 2.430060  | H | 3.680331  | 1.413101  | -1.884875 |
| H                           | 0.536236  | 3.770272  | 2.059625  | H | 2.793421  | 1.676658  | -3.171318 |
| H                           | 1.680182  | 0.861074  | 2.223363  | O | -0.630433 | 2.951586  | -1.287045 |
| H                           | -0.375991 | 2.379185  | 1.937133  | H | 3.274025  | 3.715703  | -0.990418 |

|             |           |           |           |   |           |           |           |
|-------------|-----------|-----------|-----------|---|-----------|-----------|-----------|
| H           | 3.217517  | 3.775024  | -2.738805 | H | 0.513130  | 5.296034  | 0.513961  |
| O           | 1.359916  | 3.583685  | -1.916835 | O | -2.357446 | 5.124883  | 2.005383  |
| C           | 2.727113  | 3.227440  | -1.872631 | O | -3.775329 | 5.325850  | 0.280625  |
| C           | 0.532389  | 2.854762  | -1.248140 | H | -0.730627 | 5.674628  | 3.146686  |
| O           | 1.554028  | 1.169622  | -1.556987 | C | -2.646678 | 5.340455  | 0.675555  |
| C           | -0.749942 | -2.596551 | 3.166159  | O | -1.512915 | 5.666704  | -0.049390 |
| C           | -0.967924 | -3.807855 | 2.277120  | C | -0.368170 | 5.770677  | 0.942518  |
| C           | -0.784765 | -3.039637 | 4.686074  | H | -0.156379 | 6.861468  | 1.062412  |
| H           | 0.250743  | -2.233486 | 2.954542  | H | -0.581983 | 4.053378  | 2.307468  |
| C           | -2.759145 | -2.015558 | -1.382851 | C | -0.897099 | 5.102798  | 2.226528  |
| H           | -3.085628 | -3.028583 | -1.585096 | H | 0.523950  | -4.423057 | -2.093759 |
| C           | -1.428447 | -1.590954 | -1.919518 | O | 1.903610  | -1.622231 | -1.624780 |
| C           | -3.803440 | -0.979595 | -1.920908 | O | 4.025509  | -2.179222 | -1.248805 |
| C           | -3.062120 | 1.894549  | 1.841812  | H | -0.128855 | -1.879217 | -1.375588 |
| C           | -3.518983 | 1.907195  | 3.364561  | C | 2.893750  | -2.542432 | -1.380465 |
| C           | -3.996158 | 2.687660  | 1.021893  | O | 2.463673  | -3.830024 | -1.450128 |
| H           | -2.055214 | 2.312849  | 1.843210  | C | 1.019328  | -3.770675 | -1.389399 |
| H           | 0.154465  | -3.617005 | 4.848086  | H | 0.722134  | -3.891490 | -0.358117 |
| H           | -1.686987 | -3.584234 | 4.886466  | H | 0.445379  | -2.294964 | -3.017956 |
| H           | -0.759003 | -2.144455 | 5.341306  | C | 0.698346  | -2.362483 | -1.969928 |
| H           | -1.660491 | -4.547420 | 2.684320  | O | -1.766266 | 0.872696  | 1.774599  |
| H           | 0.025846  | -4.232024 | 2.053665  | O | -2.997899 | -1.447749 | 2.345128  |
| H           | -1.385867 | -3.531483 | 1.300929  | O | -0.181809 | 3.120588  | 6.224761  |
| H           | -3.627090 | 0.026409  | -1.448097 | H | 0.937770  | 1.777643  | 7.305840  |
| H           | -4.829477 | -1.334435 | -1.683634 | H | -0.368434 | 0.112174  | 6.296749  |
| H           | -3.737470 | -0.869137 | -2.991822 | C | -1.029594 | 0.956601  | 6.630633  |
| H           | -0.589521 | -2.010237 | -1.381391 | O | -1.557136 | 3.643255  | 4.512565  |
| H           | -1.364085 | -0.489680 | -1.838957 | H | -0.462565 | 2.543483  | 8.129353  |
| H           | -1.340468 | -1.737447 | -3.002751 | C | -1.113128 | 2.833854  | 5.289207  |
| H           | -4.612305 | 1.664144  | 3.483302  | H | -1.845398 | 0.589928  | 7.210661  |
| H           | -3.365695 | 2.900549  | 3.833213  | C | -0.122154 | 2.085589  | 7.204731  |
| H           | -2.937066 | 1.069777  | 3.831550  | O | -1.557375 | 1.582633  | 5.393538  |
| H           | -3.909833 | 2.492519  | 0.009218  | H | 2.707674  | 0.518279  | -1.122648 |
| H           | -3.912560 | 3.728869  | 1.296022  | O | -5.189996 | -3.016642 | 4.068007  |
| H           | -5.043991 | 2.423937  | 1.394239  | H | -5.321376 | -2.572844 | 1.993999  |
| <b>II-D</b> |           |           |           | H | -6.844256 | -0.778662 | 2.425997  |
| V           | -3.265962 | 0.335846  | 2.007114  | C | -6.816207 | -1.523753 | 3.225143  |
| O           | 3.961257  | 0.712466  | 5.797058  | O | -4.364501 | -1.672889 | 5.678635  |
| O           | 2.901819  | -1.162555 | 6.573748  | H | -6.557342 | -3.633687 | 2.666679  |
| O           | -4.115531 | 0.511969  | 0.472276  | C | -5.155636 | -1.827420 | 4.773797  |
| O           | 1.869759  | 0.141978  | 5.096968  | H | -7.835517 | -1.751860 | 3.579191  |
| C           | 1.983401  | 1.194586  | 4.038537  | C | -5.965226 | -2.748176 | 2.861940  |
| C           | 2.803148  | 0.547836  | 2.922355  | O | -6.095267 | -0.934795 | 4.328042  |
| O           | 2.688165  | 1.383315  | 1.647639  | O | -4.298036 | 1.101250  | 3.253580  |
| C           | 3.030860  | -0.077332 | 5.825840  | C | 2.754187  | 2.354071  | -1.602449 |
| H           | 0.900198  | 1.456980  | 3.724312  | H | 3.643470  | 2.916755  | -1.923299 |
| H           | 2.412512  | -0.485806 | 2.671579  | H | 2.182008  | 2.272335  | -2.504722 |
| H           | 2.411869  | 2.041085  | 4.547176  | O | 1.239547  | -0.229015 | 0.784542  |
| H           | 3.849382  | 0.571894  | 3.227680  | H | 2.572511  | 3.399532  | 0.387924  |
| C           | 3.196636  | -1.887005 | 8.860400  | H | 1.302822  | 3.790867  | -0.864799 |
| C           | 3.968655  | -1.392081 | 7.619681  | O | 1.190772  | 2.009532  | 0.243289  |
| H           | 2.322540  | -2.496193 | 8.507975  | C | 1.993254  | 3.040066  | -0.474500 |
| H           | 3.855329  | -2.559670 | 9.413405  | C | 1.692013  | 0.898464  | 0.868168  |
| H           | 4.432399  | -0.427040 | 7.861796  | O | 3.312972  | 1.092796  | -1.209321 |
| H           | 4.579600  | -2.193197 | 7.236426  | C | -1.615200 | -2.129204 | 2.373271  |
| C           | 2.424699  | -1.248501 | 11.104465 | C | -1.933856 | -3.620099 | 2.142687  |
| O           | 2.803726  | -0.768239 | 9.769662  | C | -0.993210 | -1.878350 | 3.716969  |
| H           | 2.770056  | -2.294908 | 11.326465 | H | -1.056662 | -1.643895 | 1.556152  |
| H           | 1.281215  | -1.269370 | 11.185254 | C | -3.836708 | 0.681196  | -0.974871 |
| H           | 2.910514  | -0.499764 | 11.745512 | H | -4.687289 | 0.153026  | -1.488311 |



|   |           |           |           |
|---|-----------|-----------|-----------|
| C | -2.515576 | 0.038262  | -1.352831 |
| C | -3.992667 | 2.141369  | -1.449762 |
| C | -4.573967 | 2.474377  | 3.772179  |
| C | -5.176814 | 2.317763  | 5.134795  |
| C | -5.538300 | 2.971366  | 2.685492  |
| H | -3.599850 | 2.993786  | 3.780463  |
| H | -0.068775 | -2.454041 | 3.830530  |
| H | -1.647920 | -2.307365 | 4.508761  |
| H | -0.776295 | -0.866622 | 4.039395  |
| H | -2.259630 | -4.105389 | 3.071094  |
| H | -0.999272 | -4.069373 | 1.779798  |
| H | -2.756917 | -3.743093 | 1.418014  |
| H | -3.148743 | 2.817429  | -1.128440 |
| H | -4.914060 | 2.659050  | -1.222377 |
| H | -4.007762 | 2.069788  | -2.566670 |
| H | -2.405097 | -0.989937 | -0.941601 |
| H | -1.633033 | 0.675008  | -1.012247 |
| H | -2.446528 | -0.083325 | -2.458958 |
| H | -5.920747 | 1.460649  | 5.171922  |
| H | -5.765702 | 3.214560  | 5.404359  |
| H | -4.374296 | 2.104196  | 5.824896  |
| H | -6.274589 | 3.642485  | 3.059875  |
| H | -6.018094 | 2.140008  | 2.202312  |
| H | -4.900624 | 3.560467  | 2.036029  |
